# Supplementary material for: A SARS-CoV-2-Human Protein-Protein Interaction Map Reveals Drug Targets and Potential Drug-Repurposing
Source: bioRxiv preprint, doi:10.1101/2020.03.22.002386, version 3 (2020-03-27)
Supplement: Supplementary Table 1 [file 002386_file11.xlsx]

## Sheet: Unthresholded SARS CoV2 PPIs
Bait	Preys	PreyGene	MIST	Saint_BFDR	AvgSpec	Spec	CtrlCounts	FoldChange	SaintScore
SARS-CoV2 E	A0A0U1RRE5	NBDY	0.32236	0.5	1.67	1|1|3	3|0|2|3|2|0|0|3|1|2|1	1.08	0.04
SARS-CoV2 E	A1KXE4	FAM168B	0.0123017	0.69	0.33	0|1|0	1|0|0|0|0|1|0|0|1|2|1	0.61	0
SARS-CoV2 E	A6NDG6	PGP	0.318945	0.62	3.33	1|3|6	2|3|6|4|5|4|4|5|6|3|3	0.81	0
SARS-CoV2 E	A6NHQ2	FBLL1	0.0461757	0.69	0.33	0|0|1	0|0|0|0|0|0|0|0|1|0|0	3.33	0
SARS-CoV2 E	E9PRG8	C11orf98	0.344609	0.44	1.33	1|1|2	1|1|0|1|2|1|1|0|0|0|2	1.63	0.1
SARS-CoV2 E	O00139	KIF2A	0.0321901	0.32	0.67	0|0|2	0|0|0|0|0|0|0|1|1|0|0	3.67	0.3
SARS-CoV2 E	O00165	HAX1	0.0101989	0.23	0.67	0|0|2	0|0|0|0|0|0|0|0|0|0|0	6.67	0.32
SARS-CoV2 E	O00170	AIP	0.285578	0.69	2	2|1|3	6|4|6|5|2|1|3|4|5|4|4	0.5	0
SARS-CoV2 E	O00178	GTPBP1	0.240946	0.39	1	0|1|2	1|1|1|1|1|0|0|0|0|0|0	2.2	0.19
SARS-CoV2 E	O00203	AP3B1	0.96355	0	4.67	2|6|6	0|0|0|0|0|0|0|0|0|0|0	46.67	0.99
SARS-CoV2 E	O00244	ATOX1	0.322849	0.63	2.67	1|3|4	4|3|4|8|3|4|4|5|3|1|0	0.75	0
SARS-CoV2 E	O00422	SAP18	0.0619738	0.69	0.33	0|0|1	0|1|1|0|0|0|0|0|1|0|0	1.22	0
SARS-CoV2 E	O00443	PIK3C2A	0.275017	0.69	0.67	0|1|1	0|0|0|0|0|0|0|0|1|0|0	6.67	0
SARS-CoV2 E	O00458	IFRD1	0.268575	0.69	0.67	0|1|1	0|0|0|1|0|0|0|0|0|0|0	6.67	0
SARS-CoV2 E	O00479	HMGN4	0.161693	0.47	1.67	0|1|4	1|2|1|2|2|2|3|1|0|2|3	0.96	0.07
SARS-CoV2 E	O00483	NDUFA4	0.312458	0.69	1	1|1|1	0|0|1|0|0|0|0|1|1|0|1	2.75	0
SARS-CoV2 E	O00488	ZNF593	0.0475793	0.36	0.67	0|0|2	0|0|0|1|2|0|0|1|0|0|0	1.83	0.23
SARS-CoV2 E	O00541	PES1	0.235679	0.37	3.67	0|4|7	1|2|1|6|5|4|0|0|2|1|2	1.68	0.23
SARS-CoV2 E	O00567	NOP56	0.204319	0.17	1.67	0|3|2	0|3|1|1|0|0|0|1|2|0|0	2.29	0.34
SARS-CoV2 E	O00571	DDX3X	0.327035	0.6	3	2|4|3	5|4|1|1|3|2|2|5|4|3|3	1	0
SARS-CoV2 E	O00743	PPP6C	0.0270812	0.69	0.33	0|0|1	0|0|0|0|0|0|0|0|0|0|0	3.33	0
SARS-CoV2 E	O14556	GAPDHS	0.00965906	0.69	0.33	0|0|1	0|1|1|2|1|1|1|0|0|1|1	0.41	0
SARS-CoV2 E	O14617	AP3D1	0.460963	0.18	1.67	0|1|4	0|0|0|0|0|0|0|0|0|0|0	16.67	0.33
SARS-CoV2 E	O14654	IRS4	0.293701	0.05	2	2|3|1	0|0|0|1|0|0|0|0|0|0|0	20	0.65
SARS-CoV2 E	O14730	RIOK3	0.209432	0.69	0.33	0|1|0	0|0|0|0|0|0|0|0|0|0|0	3.33	0
SARS-CoV2 E	O14735	CDIPT	0.0354576	0.69	0.33	1|0|0	0|0|0|0|0|0|0|0|0|0|0	3.33	0
SARS-CoV2 E	O14757	CHEK1	0.344767	0.6	2	1|2|3	2|2|2|4|3|1|1|4|5|2|2	0.79	0
SARS-CoV2 E	O14776	TCERG1	0.0417299	0.69	0.33	0|0|1	0|0|0|0|0|0|0|0|0|0|0	3.33	0
SARS-CoV2 E	O14965	AURKA	0.0133515	0.48	0.67	0|2|0	0|1|1|2|2|0|3|1|1|0|0	0.67	0.06
SARS-CoV2 E	O15042	U2SURP	0.336988	0.69	19	12|22|23	25|31|14|16|16|24|23|14|25|17|21	0.92	0
SARS-CoV2 E	O15145	ARPC3	0.215369	0.69	0.67	0|1|1	2|1|0|1|0|1|0|1|1|0|1	0.92	0
SARS-CoV2 E	O15235	MRPS12	0.305616	0.59	3.33	1|6|3	6|2|6|6|4|3|1|6|3|1|2	0.92	0
SARS-CoV2 E	O15347	HMGB3	0.227397	0.56	6.67	0|10|10	2|6|3|14|9|4|1|0|3|8|5	1.33	0.01
SARS-CoV2 E	O15371	EIF3D	0.262385	0.69	0.67	0|1|1	0|0|0|1|0|0|0|0|1|0|0	3.67	0
SARS-CoV2 E	O15372	EIF3H	0.235578	0.69	0.67	0|1|1	0|0|0|1|0|0|0|0|0|0|0	6.67	0
SARS-CoV2 E	O43175	PHGDH	0.322417	0.16	3.67	2|5|4	1|2|5|2|0|1|1|1|2|1|0	2.52	0.38
SARS-CoV2 E	O43290	SART1	0.234452	0.36	1	0|1|2	0|0|0|1|1|0|0|1|1|0|0	2.75	0.23
SARS-CoV2 E	O43390	HNRNPR	0.00619531	0.69	0.33	0|0|1	0|7|5|3|0|0|0|0|2|0|0	0.22	0
SARS-CoV2 E	O43396	TXNL1	0.190333	0.5	1.33	0|1|3	3|1|3|3|0|0|0|1|3|2|1	0.86	0.04
SARS-CoV2 E	O43482	OIP5	0.313568	0.69	1	1|1|1	3|1|1|1|1|2|2|0|2|1|1	0.73	0
SARS-CoV2 E	O43583	DENR	0.193306	0.38	1.33	0|1|3	1|0|0|4|1|2|0|0|1|0|0	1.63	0.2
SARS-CoV2 E	O43663	PRC1	0.0128412	0.69	0.33	0|0|1	0|0|3|1|1|0|0|2|0|1|0	0.46	0
SARS-CoV2 E	O43670	ZNF207	0.228413	0.15	2	0|4|2	0|1|1|2|3|1|0|0|0|0|0	2.75	0.41
SARS-CoV2 E	O43684	BUB3	0.216929	0.54	4.33	0|5|8	5|4|3|6|5|2|2|2|5|5|3	1.13	0.02
SARS-CoV2 E	O43809	NUDT21	0.221721	0.45	2.33	0|4|3	1|2|2|4|2|2|1|1|0|2|2	1.35	0.1
SARS-CoV2 E	O43813	LANCL1	0.0404765	0.69	0.33	0|0|1	1|1|1|0|0|1|0|0|1|0|0	0.73	0
SARS-CoV2 E	O43837	IDH3B	0.30158	0.69	1	1|1|1	2|3|4|3|2|1|1|1|2|4|3	0.42	0
SARS-CoV2 E	O60547	GMDS	0.0201404	0.69	0.33	0|0|1	0|0|2|0|0|0|0|1|2|1|1	0.52	0
SARS-CoV2 E	O60563	CCNT1	0.102648	0.69	0.33	0|1|0	0|0|0|0|0|0|0|0|0|0|0	3.33	0
SARS-CoV2 E	O60716	CTNND1	0.219447	0.42	1.67	0|2|3	0|3|3|0|1|0|0|1|1|3|1	1.41	0.14
SARS-CoV2 E	O60762	DPM1	0.170345	0.19	1.33	0|3|1	0|0|0|0|0|0|0|0|0|0|0	13.33	0.33
SARS-CoV2 E	O60828	PQBP1	0.117851	0.33	0.67	0|0|2	0|0|0|2|0|0|0|0|0|0|0	3.67	0.29
SARS-CoV2 E	O60832	DKC1	0.207268	0.69	0.67	0|1|1	1|2|1|1|1|1|0|0|2|0|1	0.73	0
SARS-CoV2 E	O60841	EIF5B	0.219158	0.65	6.33	0|8|11	8|9|10|13|14|6|2|3|6|5|5	0.86	0
SARS-CoV2 E	O60869	EDF1	0.32917	0.17	5	1|5|9	3|4|2|5|2|2|1|1|2|2|3	2.04	0.34
SARS-CoV2 E	O60884	DNAJA2	0.304976	0	3	3|2|4	0|0|0|0|0|0|0|0|0|0|0	30	0.98
SARS-CoV2 E	O60885	BRD4	0.978488	0	2.67	2|2|4	0|0|0|0|0|0|0|0|0|0|0	26.67	0.97
SARS-CoV2 E	O75190	DNAJB6	0.0406858	0.69	0.33	1|0|0	0|0|0|0|0|0|0|1|0|0|0	3.33	0
SARS-CoV2 E	O75340	PDCD6	0.215707	0.64	3	0|4|5	3|4|8|7|4|4|4|3|5|4|3	0.67	0
SARS-CoV2 E	O75367	MACROH2A1	0.015783	0.69	0.33	0|0|1	0|4|3|2|0|0|0|0|0|0|0	0.41	0
SARS-CoV2 E	O75400	PRPF40A	0.328298	0.57	4	1|5|6	3|3|3|5|3|5|2|2|4|3|5	1.16	0
SARS-CoV2 E	O75475	PSIP1	0.214666	0.69	0.67	0|1|1	1|1|2|4|1|0|0|2|0|1|1	0.56	0
SARS-CoV2 E	O75531	BANF1	0.380126	0.4	1.67	1|2|2	2|2|3|4|0|0|0|0|0|0|0	1.67	0.16
SARS-CoV2 E	O75533	SF3B1	0.169381	0.37	1.67	0|1|4	1|1|1|1|0|1|1|1|2|0|3	1.53	0.23
SARS-CoV2 E	O75554	WBP4	0.137028	0.69	0.33	0|0|1	0|0|0|0|0|0|0|0|0|0|0	3.33	0
SARS-CoV2 E	O75694	NUP155	0.3313	0.42	3.67	1|4|6	5|1|2|1|2|2|1|1|4|5|2	1.55	0.13
SARS-CoV2 E	O75817	POP7	0.422467	0.69	0.33	0|1|0	0|0|0|0|0|0|0|0|0|0|0	3.33	0
SARS-CoV2 E	O75821	EIF3G	0.264278	0.69	0.67	0|1|1	0|0|0|0|2|0|0|0|0|0|0	3.67	0
SARS-CoV2 E	O75937	DNAJC8	0.220653	0.35	5.33	0|6|10	3|2|1|9|5|3|1|1|2|4|3	1.73	0.25
SARS-CoV2 E	O75940	SMNDC1	0.346566	0.51	5	3|7|5	3|4|3|4|5|5|1|2|3|2|3	1.57	0.04
SARS-CoV2 E	O76031	CLPX	0.23716	0.69	0.67	1|1|0	0|1|0|1|1|0|0|0|0|1|0	1.83	0
SARS-CoV2 E	O94832	MYO1D	0.109803	0.69	0.33	1|0|0	0|0|0|0|0|0|0|0|0|0|0	3.33	0
SARS-CoV2 E	O94903	PLPBP	0.336235	0.64	4	3|4|5	7|6|4|4|3|3|4|4|4|5|6	0.88	0
SARS-CoV2 E	O95218	ZRANB2	0.338293	0.33	1	1|0|2	0|0|2|0|0|0|0|0|0|0|0	5.5	0.29
SARS-CoV2 E	O95232	LUC7L3	0.328474	0.69	15	10|18|17	18|19|18|21|25|18|17|18|21|8|14	0.84	0
SARS-CoV2 E	O95336	PGLS	0.00887048	0.69	0.33	0|0|1	1|0|0|0|1|1|0|1|2|2|7	0.24	0
SARS-CoV2 E	O95372	LYPLA2	0.315911	0.69	1	1|1|1	2|2|3|2|0|0|0|0|0|0|0	1.22	0
SARS-CoV2 E	O95456	PSMG1	0.280915	0.69	0.67	0|1|1	0|0|0|0|0|0|0|0|0|0|1	6.67	0
SARS-CoV2 E	O95801	TTC4	0.0648687	0.69	0.33	0|0|1	0|0|0|0|0|0|0|0|0|0|0	3.33	0
SARS-CoV2 E	O95881	TXNDC12	0.321311	0.69	2.67	1|4|3	5|5|7|5|5|4|2|6|4|4|3	0.59	0
SARS-CoV2 E	P00403	MT-CO2	0.0101438	0.69	0.33	0|0|1	0|0|0|0|0|0|0|0|0|0|0	3.33	0
SARS-CoV2 E	P00441	SOD1	0.015673	0.69	0.33	0|0|1	3|1|1|0|0|0|0|0|1|1|0	0.52	0
SARS-CoV2 E	P00492	HPRT1	0.332236	0.46	3.33	1|5|4	2|3|3|2|1|2|1|2|4|2|2	1.53	0.08
SARS-CoV2 E	P00558	PGK1	0.207536	0.69	0.67	0|1|1	1|2|1|2|3|0|0|0|1|1|2	0.56	0
SARS-CoV2 E	P01889	HLA-B	0.254791	0.69	0.67	0|1|1	0|0|0|0|0|0|0|0|0|0|0	6.67	0
SARS-CoV2 E	P04075	ALDOA	0.0117646	0.69	0.33	0|0|1	1|1|1|1|2|0|0|1|2|0|1	0.37	0
SARS-CoV2 E	P04080	CSTB	0.332479	0.65	5	3|6|6	5|7|6|4|5|5|5|6|8|3|5	0.93	0
SARS-CoV2 E	P04406	GAPDH	0.326681	0.62	3.67	2|3|6	7|6|3|4|2|3|3|4|7|2|4	0.9	0
SARS-CoV2 E	P04792	HSPB1	0.0146166	0.69	0.33	0|1|0	0|0|0|1|1|0|0|1|0|0|0	1.22	0
SARS-CoV2 E	P04843	RPN1	0.3477	0	8.33	6|10|9	0|0|0|0|0|0|0|0|0|0|0	83.33	1
SARS-CoV2 E	P04844	RPN2	0.324322	0.05	2.33	1|2|4	0|0|0|0|0|0|0|0|0|0|0	23.33	0.65
SARS-CoV2 E	P05023	ATP1A1	0.330669	0	8.67	8|9|9	0|0|0|0|0|0|0|0|1|0|0	86.67	1
SARS-CoV2 E	P05114	HMGN1	0.203491	0.49	3.67	0|7|4	1|4|4|6|6|0|1|2|3|2|4	1.22	0.06
SARS-CoV2 E	P05141	SLC25A5	0.322795	0.53	4.67	3|5|6	3|4|4|5|3|2|4|3|5|0|0	1.56	0.02
SARS-CoV2 E	P05165	PCCA	0.334588	0.69	13.33	7|14|19	24|29|17|10|11|21|24|7|29|21|21	0.69	0
SARS-CoV2 E	P05166	PCCB	0.343262	0.68	12	7|14|15	18|20|6|5|6|19|18|4|27|16|13	0.87	0
SARS-CoV2 E	P05198	EIF2S1	0.258519	0.12	1.33	0|2|2	0|0|0|3|0|0|0|0|0|0|0	4.89	0.54
SARS-CoV2 E	P05204	HMGN2	0.323315	0.64	6.33	2|8|9	4|3|7|8|6|5|6|7|9|9|5	1.01	0
SARS-CoV2 E	P05386	RPLP1	0.208408	0.69	0.67	0|1|1	1|2|1|1|0|0|0|0|4|0|0	0.81	0
SARS-CoV2 E	P05387	RPLP2	0.345111	0.53	4	2|5|5	2|8|5|6|0|1|0|0|6|1|2	1.42	0.02
SARS-CoV2 E	P05388	RPLP0	0.207457	0.4	1	0|2|1	0|2|1|2|0|0|0|0|1|0|0	1.83	0.17
SARS-CoV2 E	P06493	CDK1	0.373986	0.11	3	1|3|5	0|0|0|0|0|0|0|0|2|1|2	6.6	0.6
SARS-CoV2 E	P06576	ATP5F1B	0.323031	0.54	4.67	2|5|7	4|4|8|5|4|2|2|2|2|2|3	1.35	0.02
SARS-CoV2 E	P06733	ENO1	0.325911	0.69	4	2|4|6	12|7|7|8|7|4|6|4|6|4|5	0.63	0
SARS-CoV2 E	P06748	NPM1	0.190428	0.69	3	0|6|3	4|15|14|15|2|0|0|1|10|3|2	0.5	0
SARS-CoV2 E	P07195	LDHB	0.0117302	0.41	0.67	0|0|2	1|1|1|1|1|0|0|0|2|0|0	1.05	0.15
SARS-CoV2 E	P07305	H1-0	0.216486	0.69	0.67	0|1|1	1|2|3|1|1|0|0|0|1|0|0	0.81	0
SARS-CoV2 E	P07355	ANXA2	0.224341	0.53	1.33	0|2|2	2|2|2|2|0|2|1|1|2|2|1	0.86	0.02
SARS-CoV2 E	P07437	TUBB	0.305205	0.62	4.33	4|5|4	5|4|7|3|6|2|2|5|4|2|3	1.11	0
SARS-CoV2 E	P07814	EPRS1	0.00819183	0.69	0.33	0|0|1	0|0|1|1|2|1|1|1|0|0|2	0.41	0
SARS-CoV2 E	P07910	HNRNPC	0.227821	0.42	3	0|3|6	0|7|7|3|0|0|1|0|6|0|0	1.38	0.14
SARS-CoV2 E	P08195	SLC3A2	0.341171	0	2.67	2|3|3	0|0|0|0|0|0|0|0|0|0|0	26.67	0.98
SARS-CoV2 E	P08237	PFKM	0.0105685	0.69	0.33	0|1|0	0|0|0|0|0|0|0|0|0|0|0	3.33	0
SARS-CoV2 E	P08559	PDHA1	0.0273276	0.69	0.33	0|1|0	0|0|0|0|0|0|0|0|0|0|0	3.33	0
SARS-CoV2 E	P08579	SNRPB2	0.341509	0.41	1.33	1|1|2	0|1|1|1|1|0|1|1|1|0|0	2.1	0.15
SARS-CoV2 E	P08621	SNRNP70	0.0499019	0.4	0.67	0|2|0	0|1|0|9|0|0|0|0|0|0|0	0.73	0.16
SARS-CoV2 E	P08670	VIM	0.191155	0.69	2	0|2|4	1|12|12|16|0|0|1|0|8|0|0	0.44	0
SARS-CoV2 E	P08708	RPS17	0.333244	0.68	10.67	5|13|14	15|13|13|16|12|9|7|12|14|8|6	0.94	0
SARS-CoV2 E	P08865	RPSA	0.318338	0.65	5.33	5|6|5	7|3|6|10|3|4|4|7|6|6|4	0.98	0
SARS-CoV2 E	P09234	SNRPC	0.0347205	0.69	0.33	0|0|1	0|0|2|1|0|0|0|0|0|0|0	1.22	0
SARS-CoV2 E	P09429	HMGB1	0.308969	0.66	9.67	2|12|15	12|10|7|18|12|5|7|4|11|7|7	1.06	0
SARS-CoV2 E	P09543	CNP	0.228124	0.08	1.33	0|2|2	0|0|0|1|0|0|0|0|0|0|0	13.33	0.64
SARS-CoV2 E	P09651	HNRNPA1	0.345865	0.55	3.33	2|3|5	3|7|7|7|0|1|0|1|6|0|0	1.15	0.01
SARS-CoV2 E	P09661	SNRPA1	0.221797	0.51	1	0|1|2	0|2|1|2|1|1|1|1|1|1|2	0.85	0.04
SARS-CoV2 E	P09874	PARP1	0.314069	0.69	31.67	8|39|48	31|42|33|61|47|31|14|30|32|34|29	0.91	0
SARS-CoV2 E	P0DPB5	POLR1D	0.344646	0.69	1	1|1|1	1|0|0|1|1|1|1|1|1|0|0	1.57	0
SARS-CoV2 E	P10321	HLA-C	0.223827	0.23	1	1|0|2	0|0|0|0|0|0|0|0|0|0|0	10	0.32
SARS-CoV2 E	P10412	H1-4	0.194734	0.34	1.67	0|1|4	0|1|4|0|0|0|0|0|3|0|0	2.29	0.26
SARS-CoV2 E	P10599	TXN	0.319097	0.67	6.67	5|6|9	8|7|12|8|10|5|7|8|10|5|9	0.82	0
SARS-CoV2 E	P10809	HSPD1	0.301233	0.67	6.33	5|4|10	12|8|8|3|5|4|6|6|13|12|12	0.78	0
SARS-CoV2 E	P11021	HSPA5	0.327988	0.62	19.33	13|22|23	15|11|10|11|12|10|12|7|11|12|10	1.76	0
SARS-CoV2 E	P11142	HSPA8	0.320101	0.69	14.33	7|15|21	22|15|22|24|23|9|12|19|21|11|14	0.82	0
SARS-CoV2 E	P11177	PDHB	0.00891859	0.69	0.33	0|1|0	0|0|0|1|0|0|0|0|0|0|0	3.33	0
SARS-CoV2 E	P11387	TOP1	0.332447	0.67	11	4|13|16	11|12|16|13|12|10|10|7|10|5|8	1.06	0
SARS-CoV2 E	P11498	PC	0.325736	0.69	61	51|70|62	88|80|55|48|44|63|67|42|86|64|68	0.95	0
SARS-CoV2 E	P11586	MTHFD1	0.295411	0.64	3	1|2|6	8|3|8|9|2|2|2|2|7|7|5	0.6	0
SARS-CoV2 E	P12004	PCNA	0.00452153	0.69	0.33	0|0|1	0|0|0|0|0|0|0|0|0|0|0	3.33	0
SARS-CoV2 E	P12236	SLC25A6	0.207141	0.52	1.67	3|1|1	2|2|2|2|2|1|1|2|1|1|2	1.02	0.03
SARS-CoV2 E	P12270	TPR	0.00907441	0.69	0.33	0|0|1	1|1|0|0|2|1|1|1|1|1|1	0.37	0
SARS-CoV2 E	P12956	XRCC6	0.0212891	0.52	0.67	0|0|2	0|7|2|5|0|1|0|0|1|0|0	0.46	0.03
SARS-CoV2 E	P13010	XRCC5	0.0132998	0.69	0.33	0|0|1	0|6|0|3|0|0|0|0|0|0|0	0.41	0
SARS-CoV2 E	P13639	EEF2	0.322047	0.69	4.67	2|6|6	13|14|8|10|8|3|7|9|8|3|6	0.58	0
SARS-CoV2 E	P13797	PLS3	0.207222	0.52	2	0|2|4	3|2|3|1|2|2|1|1|3|3|2	0.96	0.03
SARS-CoV2 E	P13984	GTF2F2	0.215326	0.23	1	0|1|2	0|0|0|0|0|0|0|0|0|0|0	10	0.32
SARS-CoV2 E	P14174	MIF	0.313723	0.69	1.33	1|2|1	3|3|1|2|2|3|4|1|2|1|2	0.61	0
SARS-CoV2 E	P14618	PKM	0.259965	0.59	2.33	3|1|3	8|3|1|3|0|1|2|2|3|4|2	0.89	0
SARS-CoV2 E	P14866	HNRNPL	0.225188	0.58	5	0|6|9	5|13|11|7|1|0|1|1|10|1|1	1.08	0
SARS-CoV2 E	P15311	EZR	0.0515231	0.69	0.33	0|0|1	0|0|0|0|0|0|0|0|0|0|0	3.33	0
SARS-CoV2 E	P15880	RPS2	0.330861	0.64	7.33	5|9|8	7|7|6|10|8|4|5|4|8|3|4	1.22	0
SARS-CoV2 E	P16104	H2AX	0.0487712	0.69	0.33	0|0|1	1|1|0|0|0|0|0|0|0|0|0	1.83	0
SARS-CoV2 E	P16152	CBR1	0.326979	0.69	3.67	2|5|4	7|8|6|6|8|3|5|5|8|5|6	0.6	0
SARS-CoV2 E	P16402	H1-3	0.23106	0.69	0.67	0|1|1	1|2|2|1|0|0|1|0|1|0|0	0.92	0
SARS-CoV2 E	P16403	H1-2	0.341102	0.63	4.33	3|5|5	3|7|6|4|4|5|2|2|5|3|4	1.06	0
SARS-CoV2 E	P16615	ATP2A2	0.289596	0	3.67	4|5|2	0|0|0|0|0|0|0|0|0|0|0	36.67	0.99
SARS-CoV2 E	P17096	HMGA1	0.19406	0.69	1	0|1|2	3|3|1|4|1|2|2|1|5|1|1	0.46	0
SARS-CoV2 E	P17480	UBTF	0.442452	0.04	2	0|3|3	0|0|0|0|0|0|0|0|0|0|0	20	0.66
SARS-CoV2 E	P17812	CTPS1	0.323489	0.62	2.67	1|3|4	3|4|5|5|5|2|1|1|4|5|1	0.81	0
SARS-CoV2 E	P17844	DDX5	0.331937	0.67	10.67	8|11|13	10|10|14|9|12|11|8|10|10|6|7	1.1	0
SARS-CoV2 E	P17858	PFKL	0.00828609	0.23	0.67	0|0|2	0|0|0|0|0|0|0|0|0|0|0	6.67	0.32
SARS-CoV2 E	P17987	TCP1	0.204343	0.38	1.33	0|2|2	0|0|1|2|2|0|0|0|1|2|1	1.63	0.2
SARS-CoV2 E	P18085	ARF4	0.228725	0.69	0.67	1|0|1	0|0|0|0|0|0|0|0|0|0|0	6.67	0
SARS-CoV2 E	P18124	RPL7	0.350796	0.4	3	2|4|3	1|2|3|3|0|0|1|0|5|1|1	1.94	0.17
SARS-CoV2 E	P18621	RPL17	0.32826	0.65	5	2|6|7	6|6|5|6|5|4|2|5|7|7|8	0.9	0
SARS-CoV2 E	P18754	RCC1	0.0291708	0.44	0.67	0|2|0	1|1|2|2|0|1|0|0|1|0|1	0.81	0.1
SARS-CoV2 E	P19338	NCL	0.211372	0.6	3.67	0|6|5	1|14|9|13|0|0|0|0|8|0|0	0.9	0
SARS-CoV2 E	P20042	EIF2S2	0.324754	0.11	1.67	0|3|2	0|0|0|3|0|0|0|0|0|0|0	6.11	0.57
SARS-CoV2 E	P20290	BTF3	0.207089	0.69	0.67	0|1|1	0|1|1|4|3|0|0|0|0|1|0	0.73	0
SARS-CoV2 E	P20700	LMNB1	0.270345	0.41	4	1|2|9	3|9|6|4|1|1|0|0|9|0|0	1.33	0.15
SARS-CoV2 E	P21741	MDK	0.328965	0.57	2.33	2|2|3	4|0|4|3|3|2|2|1|4|0|0	1.12	0.01
SARS-CoV2 E	P21796	VDAC1	0.302197	0.23	1.33	1|2|1	0|0|0|0|0|0|0|0|0|0|0	13.33	0.32
SARS-CoV2 E	P21912	SDHB	0.686283	0	8.67	7|10|9	0|0|1|0|0|0|0|0|0|0|0	86.67	1
SARS-CoV2 E	P22061	PCMT1	0.330558	0.69	13	8|16|15	16|14|18|20|22|14|13|17|20|7|16	0.81	0
SARS-CoV2 E	P22087	FBL	0.321614	0.16	4	1|4|7	1|3|4|5|1|1|0|1|2|1|0	2.32	0.36
SARS-CoV2 E	P22102	GART	0.157801	0.58	1.67	0|1|4	4|2|7|4|1|3|2|3|4|0|0	0.61	0
SARS-CoV2 E	P22314	UBA1	0.0524204	0.34	0.67	0|0|2	0|0|0|0|1|0|0|0|1|1|0	2.44	0.26
SARS-CoV2 E	P22626	HNRNPA2B1	0.338308	0.68	8.67	3|12|11	9|28|26|26|0|2|4|1|21|2|1	0.79	0
SARS-CoV2 E	P23025	XPA	0.172097	0.69	0.33	0|1|0	1|0|0|0|0|0|0|0|0|0|0	3.33	0
SARS-CoV2 E	P23193	TCEA1	0.363487	0.11	4.33	1|5|7	1|1|0|3|1|2|0|0|0|3|0	4.33	0.61
SARS-CoV2 E	P23246	SFPQ	0.3128	0.58	4	1|4|7	1|10|6|8|2|2|2|2|5|4|1	1.02	0
SARS-CoV2 E	P23284	PPIB	0.330405	0.69	20	14|22|24	21|25|24|22|20|21|18|18|23|20|21	0.94	0
SARS-CoV2 E	P23396	RPS3	0.327188	0.67	13.67	10|17|14	21|10|15|15|8|5|6|12|12|12|8	1.21	0
SARS-CoV2 E	P23528	CFL1	0.316782	0.69	2.67	1|4|3	6|7|6|6|5|6|2|3|8|2|4	0.53	0
SARS-CoV2 E	P23588	EIF4B	0.281193	0.23	1	0|2|1	0|0|0|1|0|0|0|0|0|0|0	10	0.32
SARS-CoV2 E	P23921	RRM1	0.0203973	0.69	0.33	0|0|1	2|0|0|1|0|0|0|0|0|2|1	0.61	0
SARS-CoV2 E	P24666	ACP1	0.0274876	0.52	0.67	0|0|2	2|0|2|3|2|0|0|1|3|0|1	0.52	0.03
SARS-CoV2 E	P25205	MCM3	0.328149	0.6	3	1|4|4	6|4|4|3|4|0|0|2|3|2|7	0.94	0
SARS-CoV2 E	P25398	RPS12	0.324395	0.63	5.33	2|8|6	8|7|7|7|5|3|4|4|9|2|3	0.99	0
SARS-CoV2 E	P25440	BRD2	0.906593	0	7	3|10|8	0|0|0|1|0|0|0|0|0|0|0	70	1
SARS-CoV2 E	P25705	ATP5F1A	0.310539	0.63	6.67	6|7|7	4|5|7|4|8|5|3|4|5|6|4	1.33	0
SARS-CoV2 E	P25789	PSMA4	0.0741109	0.69	0.33	0|1|0	0|0|0|0|0|0|0|0|0|0|0	3.33	0
SARS-CoV2 E	P26196	DDX6	0.33922	0.54	1.67	1|2|2	1|3|1|1|3|3|0|0|3|1|2	1.02	0.02
SARS-CoV2 E	P26368	U2AF2	0.338601	0.68	17.67	8|23|22	15|16|16|24|18|16|11|13|16|10|11	1.17	0
SARS-CoV2 E	P26373	RPL13	0.318357	0.59	5	5|5|5	3|4|6|4|1|3|3|3|5|4|3	1.41	0
SARS-CoV2 E	P26583	HMGB2	0.292129	0.64	16	2|24|22	9|13|12|20|16|14|4|13|13|7|10	1.34	0
SARS-CoV2 E	P26599	PTBP1	0.208177	0.65	3	0|4|5	7|7|6|6|3|3|2|3|8|5|4	0.61	0
SARS-CoV2 E	P26641	EEF1G	0.332257	0.63	4	3|4|5	5|3|6|5|5|3|5|4|4|2|4	0.96	0
SARS-CoV2 E	P26885	FKBP2	0.334846	0.52	1.33	1|2|1	1|2|2|2|1|1|1|0|2|1|1	1.05	0.03
SARS-CoV2 E	P27635	RPL10	0.326656	0.64	4.67	2|7|5	7|6|6|6|5|5|5|7|6|3|3	0.87	0
SARS-CoV2 E	P27694	RPA1	0.251913	0.69	0.67	0|1|1	0|1|0|1|1|0|0|0|1|0|0	1.83	0
SARS-CoV2 E	P27695	APEX1	0.220658	0.41	8.67	0|15|11	6|5|3|15|8|5|2|4|2|2|3	1.73	0.15
SARS-CoV2 E	P27816	MAP4	0.208026	0.57	3	0|3|6	6|2|3|4|2|4|3|2|4|4|3	0.89	0.01
SARS-CoV2 E	P27824	CANX	0.366705	0	7.67	3|10|10	0|0|0|0|0|0|0|0|0|0|0	76.67	1
SARS-CoV2 E	P28070	PSMB4	0.218883	0.49	1.67	1|4|0	2|2|2|0|1|1|3|0|1|5|3	0.92	0.06
SARS-CoV2 E	P29372	MPG	0.314282	0.67	5.67	5|7|5	6|6|8|8|10|4|6|6|7|8|6	0.83	0
SARS-CoV2 E	P29597	TYK2	0.241339	0.69	0.67	0|1|1	0|0|1|1|0|1|0|0|1|1|1	1.22	0
SARS-CoV2 E	P29692	EEF1D	0.35453	0.55	4.67	4|5|5	2|1|4|1|4|3|3|3|6|2|3	1.6	0.01
SARS-CoV2 E	P30041	PRDX6	0.00751548	0.69	0.67	0|2|0	3|6|5|4|3|2|1|1|2|2|1	0.24	0
SARS-CoV2 E	P30048	PRDX3	0.312053	0.58	1.33	1|2|1	3|1|4|2|2|0|0|1|2|2|3	0.73	0
SARS-CoV2 E	P30050	RPL12	0.336221	0.5	2.67	1|4|3	2|5|5|4|0|0|2|0|5|0|0	1.28	0.04
SARS-CoV2 E	P30101	PDIA3	0.291248	0.65	4.67	1|4|9	8|7|8|9|6|4|2|4|8|7|6	0.74	0
SARS-CoV2 E	P30153	PPP2R1A	0.0107141	0.69	0.33	0|0|1	0|0|1|0|0|0|0|0|2|1|1	0.73	0
SARS-CoV2 E	P30405	PPIF	0.221065	0.52	1	0|2|1	1|3|2|1|1|0|1|2|2|0|1	0.79	0.03
SARS-CoV2 E	P30419	NMT1	0.252086	0.11	1.67	0|2|3	0|0|0|2|0|0|0|0|0|0|1	6.11	0.57
SARS-CoV2 E	P30533	LRPAP1	0.225313	0.53	4	0|5|7	2|7|2|7|4|3|1|1|2|5|3	1.19	0.02
SARS-CoV2 E	P30536	TSPO	0.31109	0.69	0.67	1|1|0	0|0|0|0|0|0|0|0|0|0|0	6.67	0
SARS-CoV2 E	P31040	SDHA	0.573486	0	16.67	13|21|16	2|0|2|1|0|0|0|0|1|0|0	30.56	1
SARS-CoV2 E	P31153	MAT2A	0.19717	0.44	1	0|2|1	1|0|1|1|1|0|1|1|2|0|1	1.22	0.1
SARS-CoV2 E	P31689	DNAJA1	0.315358	0.17	6	5|5|8	0|0|2|6|7|0|0|7|1|1|1	2.64	0.34
SARS-CoV2 E	P31942	HNRNPH3	0.0206706	0.69	0.33	0|1|0	0|2|1|7|0|0|0|0|0|0|0	0.37	0
SARS-CoV2 E	P31943	HNRNPH1	0.208308	0.57	1.33	0|2|2	1|4|3|3|0|1|1|2|2|1|3	0.7	0.01
SARS-CoV2 E	P32119	PRDX2	0.0299938	0.69	0.33	0|1|0	1|0|1|0|1|0|0|0|1|0|1	0.73	0
SARS-CoV2 E	P32121	ARRB2	0.32745	0.68	8.33	3|10|12	14|12|17|10|9|8|10|8|15|5|8	0.79	0
SARS-CoV2 E	P32969	RPL9	0.320049	0.69	6.33	5|7|7	6|8|10|12|8|6|6|7|5|4|8	0.87	0
SARS-CoV2 E	P33316	DUT	0.337296	0.63	4.33	2|5|6	4|5|5|6|5|5|5|5|6|2|3	0.93	0
SARS-CoV2 E	P33992	MCM5	0.334429	0.53	3.33	2|3|5	4|3|3|3|1|1|1|1|2|7|2	1.31	0.02
SARS-CoV2 E	P35030	PRSS3	0.312864	0.69	1	1|1|1	1|1|1|1|1|1|1|1|1|1|1	1	0
SARS-CoV2 E	P35080	PFN2	0.314455	0.69	1	1|1|1	1|1|0|1|2|2|1|1|2|1|1	0.85	0
SARS-CoV2 E	P35226	BMI1	0.0534879	0.69	0.33	0|1|0	0|1|0|1|0|0|0|0|1|0|0	1.22	0
SARS-CoV2 E	P35232	PHB	0.314832	0.64	4.67	3|3|8	4|4|10|3|6|3|8|4|6|7|6	0.84	0
SARS-CoV2 E	P35268	RPL22	0.286646	0.66	4	1|3|8	5|6|5|7|10|7|6|8|7|7|7	0.59	0
SARS-CoV2 E	P35269	GTF2F1	0.257444	0.16	1.33	0|2|2	0|0|0|3|1|1|0|0|0|1|0	2.44	0.35
SARS-CoV2 E	P35610	SOAT1	0.052548	0.23	0.67	0|2|0	0|0|0|0|0|0|0|0|0|0|0	6.67	0.32
SARS-CoV2 E	P35637	FUS	0.00843413	0.69	0.33	0|0|1	1|2|4|2|0|0|0|0|2|2|1	0.26	0
SARS-CoV2 E	P35659	DEK	0.333576	0.68	9.33	5|12|11	9|11|12|16|13|6|7|10|12|8|8	0.92	0
SARS-CoV2 E	P35754	GLRX	0.0757952	0.69	0.33	0|0|1	0|0|0|0|0|0|0|0|1|0|0	3.33	0
SARS-CoV2 E	P35998	PSMC2	0.0242438	0.69	0.33	0|0|1	0|0|0|0|0|0|0|0|0|0|0	3.33	0
SARS-CoV2 E	P36542	ATP5F1C	0.166386	0.33	1.33	0|3|1	0|0|0|2|0|0|0|0|0|2|0	3.67	0.29
SARS-CoV2 E	P36578	RPL4	0.333647	0.44	4.33	3|6|4	0|5|8|8|0|0|0|0|6|0|0	1.77	0.11
SARS-CoV2 E	P36873	PPP1CC	0.29444	0.69	0.67	0|1|1	1|1|1|0|1|0|0|0|1|1|0	1.22	0
SARS-CoV2 E	P36969	GPX4	0.332746	0.51	2.33	1|3|3	2|3|3|4|3|0|0|2|3|0|0	1.28	0.03
SARS-CoV2 E	P37108	SRP14	0.199735	0.61	1.67	0|3|2	2|3|3|3|5|2|1|3|3|2|3	0.61	0
SARS-CoV2 E	P37802	TAGLN2	0.224236	0.38	1.33	0|2|2	2|1|1|1|0|0|0|0|3|0|1	1.63	0.19
SARS-CoV2 E	P38432	COIL	0.237258	0.69	0.33	0|1|0	0|0|0|0|0|0|0|0|0|0|0	3.33	0
SARS-CoV2 E	P38646	HSPA9	0.322271	0.68	13.33	7|17|16	17|12|18|17|18|15|12|9|13|14|15	0.92	0
SARS-CoV2 E	P38919	EIF4A3	0.40419	0.14	2.33	1|3|3	1|2|2|1|0|0|1|0|1|0|0	3.21	0.44
SARS-CoV2 E	P39019	RPS19	0.32625	0.67	8.33	3|12|10	14|12|9|14|6|4|5|7|8|10|8	0.95	0
SARS-CoV2 E	P39023	RPL3	0.219704	0.47	3.67	0|6|5	1|7|9|4|0|0|0|0|9|0|0	1.34	0.07
SARS-CoV2 E	P39656	DDOST	0.270301	0.23	1.33	2|1|1	0|0|0|0|0|0|0|0|0|0|0	13.33	0.32
SARS-CoV2 E	P39748	FEN1	0.215861	0.61	6.67	0|8|12	11|9|3|14|9|4|2|1|1|5|10	1.06	0
SARS-CoV2 E	P40227	CCT6A	0.213794	0.1	1.67	0|2|3	0|0|0|1|0|0|0|0|1|0|0	9.17	0.62
SARS-CoV2 E	P40429	RPL13A	0.0146015	0.69	0.33	0|0|1	0|2|1|1|0|0|0|0|2|0|0	0.61	0
SARS-CoV2 E	P40616	ARL1	0.322609	0.69	1	1|1|1	0|0|0|0|0|0|0|0|0|0|0	10	0
SARS-CoV2 E	P40939	HADHA	0.394266	0.01	5.67	4|6|7	0|0|1|3|0|0|0|0|0|0|0	15.58	0.97
SARS-CoV2 E	P41091	EIF2S3	0.365201	0.69	0.67	0|1|1	0|0|0|1|0|0|0|0|0|0|0	6.67	0
SARS-CoV2 E	P41214	EIF2D	0.126659	0.33	0.67	0|0|2	0|0|0|2|0|0|0|0|0|0|0	3.67	0.29
SARS-CoV2 E	P41223	BUD31	0.199941	0.59	2	0|2|4	3|3|3|4|4|1|2|3|3|3|2	0.71	0
SARS-CoV2 E	P41240	CSK	0.0596696	0.69	0.33	0|0|1	0|0|0|0|0|0|0|0|1|0|0	3.33	0
SARS-CoV2 E	P41567	EIF1	0.015049	0.69	0.33	0|1|0	0|0|0|2|1|0|0|0|0|0|0	1.22	0
SARS-CoV2 E	P42167	TMPO	0.220256	0.23	1	0|1|2	0|0|0|0|0|0|0|0|0|0|0	10	0.32
SARS-CoV2 E	P42575	CASP2	0.229178	0.41	1	0|1|2	2|1|1|0|0|0|0|0|1|1|1	1.57	0.15
SARS-CoV2 E	P42677	RPS27	0.320017	0.69	2	1|2|3	4|5|3|5|2|2|4|4|4|2|2	0.59	0
SARS-CoV2 E	P42766	RPL35	0.295711	0.69	2.67	3|2|3	5|2|2|3|3|3|3|3|4|2|4	0.86	0
SARS-CoV2 E	P43243	MATR3	0.00794483	0.69	1	0|0|3	0|14|10|5|0|0|0|0|4|0|0	0.33	0
SARS-CoV2 E	P43487	RANBP1	0.0149969	0.69	0.33	0|1|0	1|0|0|0|0|0|0|0|0|0|1	1.83	0
SARS-CoV2 E	P45880	VDAC2	0.273629	0	5	7|5|3	0|0|0|0|0|0|0|0|0|0|0	50	1
SARS-CoV2 E	P45973	CBX5	0.0229726	0.69	0.33	0|0|1	0|1|1|1|1|0|0|0|0|0|1	0.73	0
SARS-CoV2 E	P46109	CRKL	0.328091	0.69	11	7|12|14	18|15|15|18|16|12|15|12|18|14|14	0.72	0
SARS-CoV2 E	P46776	RPL27A	0.201174	0.69	0.67	0|1|1	0|3|3|2|2|2|2|1|2|1|1	0.39	0
SARS-CoV2 E	P46777	RPL5	0.185417	0.42	1.33	0|1|3	0|2|1|10|0|0|0|0|1|0|0	1.05	0.14
SARS-CoV2 E	P46778	RPL21	0.342618	0.53	4	2|5|5	4|4|3|4|4|3|1|1|2|3|1	1.47	0.02
SARS-CoV2 E	P46779	RPL28	0.330321	0.53	2	1|3|2	1|2|2|2|2|2|1|2|3|1|2	1.1	0.02
SARS-CoV2 E	P46781	RPS9	0.31271	0.64	3.33	3|3|4	1|4|4|4|3|6|2|2|6|6|5	0.85	0
SARS-CoV2 E	P46782	RPS5	0.321301	0.44	6.67	4|11|5	6|7|2|10|4|3|3|2|3|4|2	1.59	0.11
SARS-CoV2 E	P46783	RPS10	0.203099	0.62	2.33	0|4|3	5|4|2|7|3|1|1|4|2|3|4	0.71	0
SARS-CoV2 E	P46977	STT3A	0.220687	0.23	1	1|2|0	0|0|0|0|0|0|0|0|0|0|0	10	0.32
SARS-CoV2 E	P47756	CAPZB	0.00979482	0.58	0.67	0|0|2	2|1|3|4|2|1|0|3|3|0|1	0.37	0
SARS-CoV2 E	P47813	EIF1AX	0.348078	0.47	1.67	1|2|2	1|2|2|1|2|1|2|1|1|0|0	1.41	0.07
SARS-CoV2 E	P47914	RPL29	0.201688	0.69	0.67	1|1|0	1|1|1|1|1|0|0|1|1|0|1	0.92	0
SARS-CoV2 E	P48047	ATP5PO	0.203646	0.69	0.67	0|1|1	1|0|1|1|1|0|0|0|1|1|1	1.05	0
SARS-CoV2 E	P48444	ARCN1	0.207037	0.69	0.67	0|1|1	0|0|0|0|0|0|0|0|0|0|0	6.67	0
SARS-CoV2 E	P48507	GCLM	0.350821	0.53	1.67	1|2|2	2|1|1|1|1|1|1|1|4|2|2	1.08	0.02
SARS-CoV2 E	P48643	CCT5	0.00745497	0.34	0.67	0|0|2	0|1|0|0|1|0|0|1|0|0|0	2.44	0.26
SARS-CoV2 E	P48729	CSNK1A1	0.22844	0.69	0.67	0|1|1	1|0|1|1|0|0|1|2|0|0|1	1.05	0
SARS-CoV2 E	P48730	CSNK1D	0.199791	0.53	1	0|1|2	2|3|3|2|1|0|0|1|0|1|2	0.73	0.02
SARS-CoV2 E	P49207	RPL34	0.292053	0.35	1.33	2|1|1	0|2|0|0|0|0|0|0|0|0|1	4.89	0.26
SARS-CoV2 E	P49327	FASN	0.0136233	0.69	0.33	0|0|1	0|0|0|1|0|0|0|0|0|0|0	3.33	0
SARS-CoV2 E	P49368	CCT3	0.206477	0.36	1	1|2|0	0|0|1|0|2|0|0|0|1|0|0	2.75	0.23
SARS-CoV2 E	P49411	TUFM	0.198264	0.69	0.67	0|1|1	3|0|0|0|0|0|0|0|2|4|1	0.73	0
SARS-CoV2 E	P49458	SRP9	0.324675	0.57	3	1|4|4	1|2|4|5|4|2|3|3|4|1|1	1.1	0.01
SARS-CoV2 E	P49589	CARS1	0.109179	0.69	0.33	0|0|1	0|0|0|0|0|0|0|0|1|0|1	1.83	0
SARS-CoV2 E	P49674	CSNK1E	0.337862	0.49	2	1|2|3	1|3|0|3|1|2|1|1|2|2|1	1.29	0.05
SARS-CoV2 E	P49756	RBM25	0.222281	0.55	4	0|6|6	6|4|4|5|3|3|3|1|4|2|2	1.19	0.01
SARS-CoV2 E	P49790	NUP153	0.0231315	0.69	0.33	0|0|1	0|0|0|0|1|1|1|0|0|0|0	1.22	0
SARS-CoV2 E	P49915	GMPS	0.216558	0.5	1.67	0|3|2	0|3|1|2|1|2|2|2|1|1|3	1.02	0.04
SARS-CoV2 E	P50402	EMD	0.387039	0	8	4|8|12	1|0|2|2|0|0|0|0|1|0|0	14.67	0.98
SARS-CoV2 E	P50454	SERPINH1	0.198565	0.69	0.67	0|1|1	1|0|3|2|0|0|0|1|1|2|2	0.61	0
SARS-CoV2 E	P50579	METAP2	0.0530265	0.23	0.67	0|0|2	0|0|0|1|0|0|0|0|0|0|0	6.67	0.32
SARS-CoV2 E	P50750	CDK9	0.233771	0.69	0.67	0|1|1	0|0|0|1|1|0|0|0|0|0|0	3.67	0
SARS-CoV2 E	P50914	RPL14	0.364816	0.38	3.33	2|4|4	3|5|4|1|0|0|1|0|3|0|1	2.04	0.2
SARS-CoV2 E	P50990	CCT8	0.00278039	0.69	0.33	0|1|0	1|0|0|0|0|1|0|0|0|0|1	1.22	0
SARS-CoV2 E	P50991	CCT4	0.300254	0.42	2	2|2|2	0|0|1|2|5|0|1|2|0|1|1	1.69	0.13
SARS-CoV2 E	P51571	SSR4	0.317997	0.15	2.33	2|3|2	1|1|1|1|0|1|1|1|1|1|0	2.85	0.4
SARS-CoV2 E	P51610	HCFC1	0.313	0.69	1	1|1|1	1|2|1|1|2|1|0|2|2|1|0	0.85	0
SARS-CoV2 E	P51858	HDGF	0.0117935	0.69	0.33	0|0|1	0|2|2|3|0|1|0|1|1|0|1	0.33	0
SARS-CoV2 E	P51970	NDUFA8	0.216833	0.41	1.33	1|0|3	1|3|2|2|1|0|0|0|1|1|0	1.33	0.15
SARS-CoV2 E	P51991	HNRNPA3	0.20927	0.61	1.67	0|3|2	1|9|10|6|0|0|0|0|4|1|0	0.59	0
SARS-CoV2 E	P52272	HNRNPM	0.328496	0.54	10.33	3|12|16	7|16|12|8|2|1|3|2|12|4|3	1.62	0.02
SARS-CoV2 E	P52292	KPNA2	0.200339	0.23	1	0|2|1	0|0|0|1|0|0|0|0|0|0|0	10	0.32
SARS-CoV2 E	P52597	HNRNPF	0.204266	0.62	2.33	0|3|4	4|6|3|12|2|1|0|1|5|1|4	0.66	0
SARS-CoV2 E	P52907	CAPZA1	0.00697833	0.69	0.33	0|0|1	1|0|0|1|0|1|0|1|3|1|1	0.41	0
SARS-CoV2 E	P52926	HMGA2	0.220935	0.69	0.67	0|1|1	0|0|0|1|1|1|1|1|2|0|0	1.05	0
SARS-CoV2 E	P53350	PLK1	0.292762	0.69	2	2|1|3	6|8|6|2|2|1|0|3|5|1|3	0.59	0
SARS-CoV2 E	P53582	METAP1	0.296161	0.69	0.67	0|1|1	0|0|0|2|0|0|0|0|0|0|0	3.67	0
SARS-CoV2 E	P53597	SUCLG1	0.220076	0.69	0.67	0|1|1	0|0|1|1|1|0|0|0|0|0|0	2.44	0
SARS-CoV2 E	P53618	COPB1	0.168042	0.32	1.33	0|1|3	0|0|1|1|0|0|0|2|0|0|0	3.67	0.3
SARS-CoV2 E	P53985	SLC16A1	0.216753	0.23	1	1|2|0	0|0|0|0|0|0|0|0|0|0|0	10	0.32
SARS-CoV2 E	P53999	SUB1	0.328314	0.69	9.67	5|12|12	12|13|15|15|13|11|12|10|13|11|11	0.78	0
SARS-CoV2 E	P54136	RARS1	0.0148093	0.69	0.33	0|1|0	2|0|0|0|1|1|1|0|0|2|2	0.41	0
SARS-CoV2 E	P54577	YARS1	0.270778	0.1	3	0|4|5	0|0|0|4|0|0|0|0|0|0|0	8.25	0.63
SARS-CoV2 E	P54727	RAD23B	0.0475195	0.69	0.33	0|0|1	0|0|0|0|0|0|0|0|0|0|0	3.33	0
SARS-CoV2 E	P54819	AK2	0.0253786	0.69	0.33	0|0|1	1|0|3|1|0|0|0|0|0|0|0	0.73	0
SARS-CoV2 E	P54886	ALDH18A1	0.213794	0.69	2	0|3|3	6|1|5|3|0|1|2|3|5|5|5	0.61	0
SARS-CoV2 E	P55010	EIF5	0.250999	0.13	2	0|2|4	0|0|0|5|0|0|0|0|0|1|0	3.67	0.51
SARS-CoV2 E	P55060	CSE1L	0.0168349	0.69	0.33	1|0|0	0|0|0|0|0|0|0|0|0|0|0	3.33	0
SARS-CoV2 E	P55081	MFAP1	0.217443	0.62	2.33	0|3|4	4|4|3|3|4|4|4|3|5|1|2	0.69	0
SARS-CoV2 E	P55084	HADHB	0.476675	0.18	2	1|0|5	0|0|0|0|0|0|0|0|0|0|0	20	0.33
SARS-CoV2 E	P55145	MANF	0.224027	0.5	5	0|7|8	2|5|2|10|5|5|1|1|3|2|3	1.41	0.04
SARS-CoV2 E	P55209	NAP1L1	0.019843	0.69	0.33	0|1|0	0|0|0|3|0|0|0|0|0|0|0	1.22	0
SARS-CoV2 E	P55769	SNU13	0.30538	0.57	1.67	1|3|1	3|2|2|2|2|2|1|2|4|2|1	0.8	0.01
SARS-CoV2 E	P55884	EIF3B	0.272354	0.69	0.67	1|1|0	0|0|0|0|2|0|0|0|0|0|0	3.67	0
SARS-CoV2 E	P56182	RRP1	0.25384	0.69	0.67	0|1|1	0|1|0|1|0|0|0|0|0|0|0	3.67	0
SARS-CoV2 E	P56192	MARS1	0.0115561	0.69	0.33	0|0|1	0|0|0|0|0|0|0|0|0|0|0	3.33	0
SARS-CoV2 E	P56270	MAZ	0.304221	0.65	3.67	1|6|4	8|5|8|6|7|4|2|5|10|1|3	0.68	0
SARS-CoV2 E	P57060	RWDD2B	0.201888	0.69	1	0|1|2	2|3|1|3|3|1|2|0|3|2|2	0.5	0
SARS-CoV2 E	P57088	TMEM33	0.346656	0	2.33	2|2|3	0|0|0|0|0|0|0|0|0|0|0	23.33	0.97
SARS-CoV2 E	P57737	CORO7	0.443804	0.69	1	1|1|1	0|0|0|0|0|0|0|0|0|0|0	10	0
SARS-CoV2 E	P57772	EEFSEC	0.68551	0.69	0.33	0|0|1	0|0|0|0|0|0|0|0|0|0|0	3.33	0
SARS-CoV2 E	P60228	EIF3E	0.705053	0.69	1	1|1|1	0|0|0|0|0|0|0|0|0|0|0	10	0
SARS-CoV2 E	P60468	SEC61B	0.310929	0.69	1	1|1|1	1|1|2|1|0|0|0|0|0|0|1	1.83	0
SARS-CoV2 E	P60507	ERVFC1	0.25706	0.69	0.67	0|1|1	0|0|0|0|0|1|0|0|1|1|0	2.44	0
SARS-CoV2 E	P60604	UBE2G2	0.0323655	0.69	0.33	0|1|0	0|0|0|0|0|0|0|0|0|0|0	3.33	0
SARS-CoV2 E	P60709	ACTB	0.216693	0.69	0.67	0|1|1	1|1|1|1|1|1|0|1|2|0|0	0.81	0
SARS-CoV2 E	P60842	EIF4A1	0.247856	0.69	0.67	1|1|0	0|0|1|1|0|0|0|0|0|0|0	3.67	0
SARS-CoV2 E	P60866	RPS20	0.329945	0.66	6.33	4|8|7	7|6|8|9|6|5|4|6|6|6|7	1	0
SARS-CoV2 E	P60891	PRPS1	0.233685	0.69	0.67	0|1|1	0|0|0|0|0|0|0|0|0|0|0	6.67	0
SARS-CoV2 E	P60981	DSTN	0.31222	0.69	1	1|1|1	1|1|2|2|2|2|0|1|1|0|0	0.92	0
SARS-CoV2 E	P61024	CKS1B	0.171845	0.69	0.33	0|0|1	0|0|0|0|0|0|0|0|0|0|0	3.33	0
SARS-CoV2 E	P61221	ABCE1	0.0327617	0.69	0.33	0|0|1	1|0|0|0|0|1|1|0|0|0|1	0.92	0
SARS-CoV2 E	P61247	RPS3A	0.324761	0.68	8.33	3|9|13	9|15|15|16|15|10|6|8|12|7|7	0.76	0
SARS-CoV2 E	P61289	PSME3	0.114957	0.69	0.33	0|0|1	0|0|0|0|0|0|0|0|0|0|0	3.33	0
SARS-CoV2 E	P61313	RPL15	0.21799	0.35	1.67	0|3|2	0|4|2|3|0|0|0|0|2|0|0	1.67	0.24
SARS-CoV2 E	P61353	RPL27	0.304082	0.69	1	1|1|1	0|3|0|1|0|0|1|0|1|0|1	1.57	0
SARS-CoV2 E	P61513	RPL37A	0.329334	0.6	3.33	2|4|4	3|5|4|3|5|2|3|3|3|2|2	1.05	0
SARS-CoV2 E	P61619	SEC61A1	0.338993	0.05	2	1|3|2	0|0|0|0|0|0|0|0|0|0|0	20	0.65
SARS-CoV2 E	P61758	VBP1	0.0661636	0.69	0.33	0|0|1	0|0|0|0|0|0|0|1|0|0|0	3.33	0
SARS-CoV2 E	P61927	RPL37	0.326687	0.69	1	1|1|1	0|0|1|2|1|1|1|1|1|0|0	1.38	0
SARS-CoV2 E	P61956	SUMO2	0.338088	0.69	0.67	0|1|1	0|0|0|0|1|0|0|1|0|0|0	3.67	0
SARS-CoV2 E	P61978	HNRNPK	0.318665	0.67	7.67	2|10|11	13|14|12|15|11|5|7|6|11|4|4	0.83	0
SARS-CoV2 E	P62081	RPS7	0.324228	0.68	10.33	4|12|15	11|19|12|15|19|11|9|14|12|12|11	0.78	0
SARS-CoV2 E	P62241	RPS8	0.322882	0.69	2.67	2|3|3	2|5|4|6|3|2|1|0|6|1|3	0.89	0
SARS-CoV2 E	P62244	RPS15A	0.207518	0.52	2.67	0|3|5	2|2|4|4|3|3|1|1|3|1|3	1.09	0.03
SARS-CoV2 E	P62249	RPS16	0.324518	0.66	10.67	9|12|11	12|8|10|11|7|6|4|6|10|8|6	1.33	0
SARS-CoV2 E	P62258	YWHAE	0.00720235	0.69	0.33	0|1|0	0|1|1|1|0|0|0|0|2|0|0	0.73	0
SARS-CoV2 E	P62263	RPS14	0.333531	0.64	5.67	3|8|6	4|7|6|9|7|3|3|5|7|6|6	0.99	0
SARS-CoV2 E	P62266	RPS23	0.303126	0.69	6.67	7|6|7	9|7|7|8|5|7|6|8|9|6|7	0.93	0
SARS-CoV2 E	P62269	RPS18	0.334204	0.65	8.33	6|10|9	8|6|8|6|4|8|4|6|9|7|8	1.24	0
SARS-CoV2 E	P62273	RPS29	0.324559	0.61	2.67	2|3|3	5|3|5|4|2|1|1|5|4|1|1	0.92	0
SARS-CoV2 E	P62277	RPS13	0.319367	0.64	5	4|4|7	5|5|5|7|5|5|4|6|7|2|5	0.98	0
SARS-CoV2 E	P62280	RPS11	0.332669	0.66	8.67	6|9|11	8|11|10|9|8|9|6|9|8|2|4	1.13	0
SARS-CoV2 E	P62304	SNRPE	0.22812	0.36	1	0|1|2	0|1|1|2|0|0|0|0|0|0|0	2.75	0.23
SARS-CoV2 E	P62306	SNRPF	0.198317	0.43	1	0|2|1	1|1|1|2|0|0|0|1|1|1|0	1.38	0.12
SARS-CoV2 E	P62314	SNRPD1	0.0370415	0.69	0.33	0|0|1	0|0|1|2|0|0|0|0|0|0|0	1.22	0
SARS-CoV2 E	P62316	SNRPD2	0.21398	0.47	1	0|2|1	1|2|3|2|1|0|0|0|0|0|1	1.1	0.08
SARS-CoV2 E	P62318	SNRPD3	0.218149	0.69	0.67	0|1|1	1|1|1|2|1|1|1|1|1|1|1	0.61	0
SARS-CoV2 E	P62424	RPL7A	0.331709	0.48	2.33	1|3|3	0|7|4|5|0|0|0|0|4|0|0	1.28	0.06
SARS-CoV2 E	P62633	CNBP	0.305149	0.66	9.33	10|9|9	12|7|15|12|8|7|6|8|10|0|0	1.21	0
SARS-CoV2 E	P62701	RPS4X	0.331862	0.68	9	5|10|12	9|11|11|11|14|7|10|13|12|5|7	0.9	0
SARS-CoV2 E	P62750	RPL23A	0.331974	0.68	7.67	4|10|9	9|7|11|12|13|6|5|10|14|7|6	0.84	0
SARS-CoV2 E	P62753	RPS6	0.290461	0.6	2.67	2|1|5	4|5|4|6|4|2|3|1|3|2|2	0.81	0
SARS-CoV2 E	P62805	H4-16	0.351431	0.62	9.33	5|10|13	7|16|17|11|1|3|6|0|12|1|2	1.35	0
SARS-CoV2 E	P62826	RAN	0.326924	0.61	2	1|2|3	1|5|4|5|2|1|1|1|4|3|3	0.73	0
SARS-CoV2 E	P62829	RPL23	0.316624	0.67	8	7|9|8	8|10|10|6|11|5|6|11|10|6|6	0.99	0
SARS-CoV2 E	P62841	RPS15	0.19763	0.61	1.67	0|3|2	4|3|4|2|4|2|1|2|2|1|4	0.63	0
SARS-CoV2 E	P62847	RPS24	0.320093	0.69	6	5|6|7	7|8|8|10|8|6|7|6|7|6|7	0.83	0
SARS-CoV2 E	P62851	RPS25	0.321084	0.64	7.67	7|8|8	9|2|8|8|5|6|2|5|6|7|5	1.34	0
SARS-CoV2 E	P62854	RPS26	0.33959	0.5	1.67	1|2|2	1|2|1|2|2|0|0|2|1|1|3	1.22	0.04
SARS-CoV2 E	P62857	RPS28	0.292909	0.69	2.67	3|3|2	5|2|3|3|3|3|1|3|5|5|3	0.81	0
SARS-CoV2 E	P62861	FAU	0.331864	0.62	3.67	2|4|5	4|5|4|4|4|3|4|1|3|5|5	0.96	0
SARS-CoV2 E	P62888	RPL30	0.321008	0.67	7.33	6|8|8	10|10|9|9|6|8|7|7|9|4|4	0.97	0
SARS-CoV2 E	P62899	RPL31	0.328439	0.66	4.67	3|5|6	7|5|7|5|7|6|6|5|6|3|5	0.83	0
SARS-CoV2 E	P62906	RPL10A	0.332393	0.14	2.67	1|2|5	0|2|3|0|0|0|1|0|2|0|0	3.67	0.44
SARS-CoV2 E	P62910	RPL32	0.300677	0.56	1.67	1|3|1	0|4|4|5|1|2|1|1|2|1|1	0.83	0.01
SARS-CoV2 E	P62913	RPL11	0.326591	0.69	6	3|8|7	10|11|12|10|8|4|6|9|9|4|6	0.74	0
SARS-CoV2 E	P62917	RPL8	0.00959891	0.38	0.67	0|0|2	0|1|1|2|0|0|0|0|1|0|0	1.47	0.19
SARS-CoV2 E	P62937	PPIA	0.316552	0.67	7.33	2|9|11	9|11|10|9|10|6|7|9|10|7|8	0.84	0
SARS-CoV2 E	P62942	FKBP1A	0.322787	0.69	2	1|2|3	4|6|7|6|5|3|1|3|6|3|3	0.47	0
SARS-CoV2 E	P62979	RPS27A	0.326615	0.58	3.33	2|5|3	6|3|4|4|3|3|2|3|5|0|1	1.08	0
SARS-CoV2 E	P62987	UBA52	0.33002	0.59	3.33	2|4|4	4|3|3|4|4|3|4|4|4|0|0	1.11	0
SARS-CoV2 E	P62995	TRA2B	0.0319054	0.69	0.33	0|0|1	0|1|1|2|0|0|0|0|1|0|0	0.73	0
SARS-CoV2 E	P63104	YWHAZ	0.222396	0.69	0.67	0|1|1	0|0|1|1|0|0|0|0|1|0|0	2.44	0
SARS-CoV2 E	P63151	PPP2R2A	0.0508829	0.69	0.33	0|0|1	0|0|1|0|0|0|0|0|0|0|0	3.33	0
SARS-CoV2 E	P63167	DYNLL1	0.317023	0.38	1.67	2|1|2	1|1|1|1|1|2|1|0|1|0|0	2.04	0.2
SARS-CoV2 E	P63173	RPL38	0.321476	0.69	14.33	12|17|14	19|15|18|19|18|15|12|13|16|16|12	0.91	0
SARS-CoV2 E	P63208	SKP1	0.213025	0.69	0.67	0|1|1	2|1|1|1|1|0|0|1|0|0|2	0.81	0
SARS-CoV2 E	P63220	RPS21	0.340246	0.41	2.67	2|3|3	2|1|1|3|2|1|0|1|1|2|1	1.96	0.15
SARS-CoV2 E	P63241	EIF5A	0.222143	0.34	1	0|2|1	0|1|0|0|0|0|1|0|0|0|1	3.67	0.26
SARS-CoV2 E	P63244	RACK1	0.373677	0.15	6.33	3|9|7	6|2|5|7|0|0|0|0|1|4|2	2.58	0.39
SARS-CoV2 E	P63261	ACTG1	0.01457	0.69	0.33	0|0|1	1|1|0|0|1|0|0|0|1|0|0	0.92	0
SARS-CoV2 E	P68036	UBE2L3	0.339485	0.46	1.33	1|2|1	1|1|1|1|1|1|1|0|1|1|1	1.47	0.08
SARS-CoV2 E	P68371	TUBB4B	0.207174	0.69	0.67	1|1|0	1|0|1|1|1|0|0|1|0|0|0	1.47	0
SARS-CoV2 E	P78346	RPP30	0.238111	0.13	1.33	0|2|2	0|0|0|1|1|1|1|0|0|0|0	3.67	0.46
SARS-CoV2 E	P78347	GTF2I	0.22595	0.69	0.67	0|1|1	1|1|3|1|1|0|0|0|1|0|0	0.92	0
SARS-CoV2 E	P78527	PRKDC	0.18486	0.31	2	1|0|5	0|0|3|2|0|0|0|1|0|0|0	3.67	0.31
SARS-CoV2 E	P78549	NTHL1	0.302438	0.69	1	1|1|1	2|3|3|3|3|1|0|0|3|2|1	0.52	0
SARS-CoV2 E	P82912	MRPS11	0.205445	0.57	1.67	0|3|2	2|2|3|3|3|3|1|1|2|1|2	0.8	0.01
SARS-CoV2 E	P82921	MRPS21	0.217371	0.69	0.67	0|1|1	1|0|1|1|1|1|0|1|1|0|2	0.81	0
SARS-CoV2 E	P82932	MRPS6	0.0353067	0.69	0.33	0|1|0	0|0|0|1|0|0|0|1|0|0|0	1.83	0
SARS-CoV2 E	P82979	SARNP	0.281467	0.1	2	0|4|2	0|0|0|2|0|0|0|0|0|0|0	11	0.62
SARS-CoV2 E	P83731	RPL24	0.31058	0.62	4.33	4|6|3	3|2|4|7|4|3|4|5|6|4|3	1.06	0
SARS-CoV2 E	P83881	RPL36A	0.315464	0.69	2	2|2|2	2|3|2|2|1|2|3|1|2|2|3	0.96	0
SARS-CoV2 E	P84090	ERH	0.313917	0.6	1.67	1|1|3	1|2|3|4|3|3|2|2|4|2|1	0.68	0
SARS-CoV2 E	P84098	RPL19	0.345326	0.58	3.67	2|5|4	1|7|4|5|1|0|2|2|5|3|5	1.15	0
SARS-CoV2 E	P84101	SERF2	0.208144	0.5	1.67	0|3|2	1|2|1|3|1|3|1|0|1|2|3	1.02	0.04
SARS-CoV2 E	P84103	SRSF3	0.325137	0.65	6.67	5|6|9	7|7|10|10|6|6|5|9|4|2|7	1	0
SARS-CoV2 E	P99999	CYCS	0.0141223	0.69	0.33	0|0|1	0|1|0|1|1|0|0|0|0|0|0	1.22	0
SARS-CoV2 E	Q00013	MPP1	0.0218371	0.69	0.33	0|0|1	4|0|1|1|0|0|0|0|1|2|2	0.33	0
SARS-CoV2 E	Q00059	TFAM	0.21939	0.59	3	0|4|5	2|6|4|4|3|2|2|4|4|3|2	0.92	0
SARS-CoV2 E	Q00325	SLC25A3	0.330535	0.02	4.33	2|5|6	2|1|1|1|1|0|0|3|1|0|1	4.33	0.68
SARS-CoV2 E	Q00688	FKBP3	0.220442	0.57	6.67	0|9|11	4|7|2|12|7|3|2|3|2|9|7	1.26	0.01
SARS-CoV2 E	Q00839	HNRNPU	0.210967	0.65	4.67	0|5|9	2|22|18|12|3|2|2|0|11|0|0	0.71	0
SARS-CoV2 E	Q01105	SET	0.211163	0.55	1.33	0|2|2	0|3|4|2|4|1|1|3|0|0|1	0.77	0.01
SARS-CoV2 E	Q01130	SRSF2	0.320046	0.59	3.33	1|3|6	3|4|2|5|5|3|2|3|4|4|4	0.94	0
SARS-CoV2 E	Q01813	PFKP	0.00314042	0.69	0.33	0|0|1	1|0|0|0|0|0|0|0|0|0|0	3.33	0
SARS-CoV2 E	Q01844	EWSR1	0.324996	0.39	2.33	2|2|3	2|0|0|0|1|3|1|2|2|0|2	1.97	0.18
SARS-CoV2 E	Q02543	RPL18A	0.335338	0.45	2	1|2|3	1|3|3|4|0|1|1|0|1|0|1	1.47	0.09
SARS-CoV2 E	Q02790	FKBP4	0.0264356	0.69	0.33	0|0|1	0|0|0|0|0|1|0|0|1|2|0	0.92	0
SARS-CoV2 E	Q02878	RPL6	0.206452	0.41	1.67	0|3|2	0|5|2|4|0|0|0|0|3|0|0	1.31	0.15
SARS-CoV2 E	Q02978	SLC25A11	0.295596	0.69	1	1|1|1	0|0|0|1|0|0|0|1|0|0|0	5.5	0
SARS-CoV2 E	Q04323	UBXN1	0.12028	0.69	0.33	0|0|1	0|0|0|0|0|0|0|0|0|1|0	3.33	0
SARS-CoV2 E	Q04837	SSBP1	0.00729458	0.69	0.33	0|1|0	0|0|0|0|0|1|2|0|0|2|2	0.52	0
SARS-CoV2 E	Q05519	SRSF11	0.214998	0.63	3.33	0|4|6	6|5|1|4|4|5|4|3|5|3|8	0.76	0
SARS-CoV2 E	Q06830	PRDX1	0.326522	0.69	4.67	3|6|5	8|5|9|9|6|5|5|4|10|7|5	0.7	0
SARS-CoV2 E	Q07020	RPL18	0.350795	0.17	2.67	1|3|4	1|4|2|2|0|0|1|0|2|0|0	2.44	0.35
SARS-CoV2 E	Q07021	C1QBP	0.185744	0.44	1	0|2|1	0|1|1|2|1|0|2|1|0|0|1	1.22	0.1
SARS-CoV2 E	Q07065	CKAP4	0.012642	0.69	0.33	0|0|1	0|0|0|0|0|0|0|0|0|0|0	3.33	0
SARS-CoV2 E	Q07666	KHDRBS1	0.208607	0.69	0.67	0|1|1	1|2|2|2|1|0|1|1|2|0|0	0.61	0
SARS-CoV2 E	Q07955	SRSF1	0.218986	0.62	2.67	0|4|4	1|4|5|15|3|2|0|1|5|3|1	0.73	0
SARS-CoV2 E	Q08170	SRSF4	0.224422	0.69	0.67	0|1|1	0|1|1|1|0|1|0|1|0|1|0	1.22	0
SARS-CoV2 E	Q08209	PPP3CA	0.213984	0.69	0.67	0|1|1	2|2|0|0|0|3|0|0|1|2|2	0.61	0
SARS-CoV2 E	Q08211	DHX9	0.00284829	0.69	0.33	0|0|1	0|12|10|6|0|0|0|0|2|0|0	0.12	0
SARS-CoV2 E	Q08945	SSRP1	0.350163	0.46	2.67	2|1|5	0|9|5|8|0|0|0|0|2|0|0	1.22	0.08
SARS-CoV2 E	Q08J23	NSUN2	0.187859	0.69	0.33	0|0|1	0|0|0|0|0|0|0|0|0|0|0	3.33	0
SARS-CoV2 E	Q09028	RBBP4	0.231707	0.69	0.67	0|1|1	0|1|2|1|0|0|0|0|1|1|0	1.22	0
SARS-CoV2 E	Q0VDF9	HSPA14	0.0692657	0.69	0.33	0|0|1	0|0|0|1|0|0|0|0|0|0|0	3.33	0
SARS-CoV2 E	Q12834	CDC20	0.351737	0.46	1.33	1|2|1	3|1|2|0|0|1|0|1|1|1|0	1.47	0.08
SARS-CoV2 E	Q12905	ILF2	0.36865	0.15	2	1|3|2	0|3|0|2|0|0|0|0|2|0|0	3.14	0.39
SARS-CoV2 E	Q12906	ILF3	0.00507413	0.69	0.33	0|0|1	0|4|4|4|0|0|0|0|1|0|0	0.28	0
SARS-CoV2 E	Q13085	ACACA	0.332234	0.69	73.33	56|81|83	146|147|50|45|48|92|104|34|143|88|105	0.81	0
SARS-CoV2 E	Q13123	IK	0.274112	0.69	0.33	0|0|1	0|0|0|1|0|0|0|0|0|0|0	3.33	0
SARS-CoV2 E	Q13148	TARDBP	0.205005	0.69	0.67	0|1|1	1|2|1|0|0|0|0|0|0|0|0	1.83	0
SARS-CoV2 E	Q13151	HNRNPA0	0.216677	0.43	1	0|2|1	0|4|1|2|0|0|0|0|2|0|0	1.22	0.12
SARS-CoV2 E	Q13185	CBX3	0.236048	0.69	0.67	0|1|1	0|2|1|7|0|0|0|0|0|0|0	0.73	0
SARS-CoV2 E	Q13200	PSMD2	0.00980061	0.69	0.33	0|0|1	0|0|2|1|1|1|0|0|0|0|0	0.73	0
SARS-CoV2 E	Q13247	SRSF6	0.040121	0.69	0.33	0|0|1	0|1|0|1|0|0|0|0|1|0|0	1.22	0
SARS-CoV2 E	Q13263	TRIM28	0.213308	0.69	0.67	0|1|1	0|1|0|0|0|0|0|0|1|0|0	3.67	0
SARS-CoV2 E	Q13347	EIF3I	0.305028	0.23	1	0|2|1	0|0|0|1|0|0|0|0|0|0|0	10	0.32
SARS-CoV2 E	Q13427	PPIG	0.0163961	0.69	0.33	0|1|0	0|1|1|2|1|1|1|1|1|2|2	0.28	0
SARS-CoV2 E	Q13428	TCOF1	0.36983	0.53	9.33	6|11|11	2|3|4|5|4|5|6|4|9|6|8	1.83	0.02
SARS-CoV2 E	Q13435	SF3B2	0.215554	0.69	0.67	0|1|1	1|1|1|0|1|1|0|0|1|1|1	0.92	0
SARS-CoV2 E	Q13442	PDAP1	0.30388	0.54	6.67	1|10|9	5|6|4|8|6|5|1|2|4|6|4	1.44	0.02
SARS-CoV2 E	Q13492	PICALM	0.68551	0.69	0.33	0|0|1	0|0|0|0|0|0|0|0|0|0|0	3.33	0
SARS-CoV2 E	Q13501	SQSTM1	0.25543	0.69	0.67	0|1|1	0|0|0|0|0|0|0|0|0|0|0	6.67	0
SARS-CoV2 E	Q13523	PRPF4B	0.35425	0.47	1.67	1|2|2	2|1|0|2|0|1|1|1|1|2|2	1.41	0.07
SARS-CoV2 E	Q13526	PIN1	0.344805	0.59	3.33	2|3|5	3|4|4|2|3|3|3|1|4|4|4	1.05	0
SARS-CoV2 E	Q13541	EIF4EBP1	0.344624	0.52	2	1|3|2	3|2|2|3|3|2|1|1|2|0|0	1.16	0.03
SARS-CoV2 E	Q13542	EIF4EBP2	0.0280377	0.69	0.33	0|0|1	0|0|0|0|1|1|0|0|0|1|0	1.22	0
SARS-CoV2 E	Q13547	HDAC1	0.0286972	0.69	0.33	0|0|1	0|0|1|1|1|0|0|0|1|0|1	0.73	0
SARS-CoV2 E	Q13573	SNW1	0.226221	0.36	3	0|5|4	1|3|0|5|3|0|0|1|3|2|1	1.74	0.23
SARS-CoV2 E	Q13637	RAB32	0.363423	0.69	1	1|1|1	1|0|0|1|1|0|1|0|0|0|1	2.2	0
SARS-CoV2 E	Q13642	FHL1	0.00937078	0.69	0.33	0|1|0	0|1|4|4|2|0|0|1|1|0|0	0.28	0
SARS-CoV2 E	Q13685	AAMP	0.079176	0.69	0.33	0|0|1	0|0|0|0|0|0|0|0|0|0|0	3.33	0
SARS-CoV2 E	Q13895	BYSL	0.0230988	0.69	0.33	0|1|0	0|0|0|1|1|0|0|0|0|0|1	1.22	0
SARS-CoV2 E	Q14008	CKAP5	0.25393	0.69	0.33	0|0|1	0|0|0|0|0|0|0|0|0|0|0	3.33	0
SARS-CoV2 E	Q14061	COX17	0.32681	0.62	3	1|4|4	5|2|5|4|5|1|3|3|5|2|3	0.87	0
SARS-CoV2 E	Q14103	HNRNPD	0.222337	0.57	2	0|3|3	1|4|8|7|1|0|1|0|4|0|1	0.81	0.01
SARS-CoV2 E	Q14241	ELOA	0.049203	0.69	0.33	0|1|0	1|0|0|0|1|0|0|0|0|0|0	1.83	0
SARS-CoV2 E	Q14247	CTTN	0.22268	0.55	2	0|3|3	4|3|5|1|0|2|0|0|3|3|3	0.92	0.01
SARS-CoV2 E	Q14257	RCN2	0.00320858	0.69	0.33	0|1|0	0|0|0|0|0|0|0|1|1|0|0	1.83	0
SARS-CoV2 E	Q14320	FAM50A	0.280657	0.12	1.33	0|2|2	0|0|0|3|0|0|0|0|0|0|0	4.89	0.54
SARS-CoV2 E	Q14331	FRG1	0.319592	0.67	7.67	3|12|8	8|12|11|12|14|10|10|10|12|3|5	0.79	0
SARS-CoV2 E	Q14444	CAPRIN1	0.209688	0.69	0.67	0|1|1	1|1|0|1|2|2|0|0|2|0|1	0.73	0
SARS-CoV2 E	Q14498	RBM39	0.333413	0.69	21.67	14|24|27	25|25|23|25|27|23|25|24|24|15|23	0.92	0
SARS-CoV2 E	Q14554	PDIA5	0.219285	0.54	1.33	0|2|2	1|1|2|5|1|1|0|1|2|3|1	0.81	0.01
SARS-CoV2 E	Q14677	CLINT1	0.191752	0.22	1.67	0|1|4	0|1|0|0|0|1|0|1|0|1|0	4.58	0.33
SARS-CoV2 E	Q14696	MESD	0.0186807	0.69	0.33	0|0|1	0|0|0|3|1|0|0|0|0|0|0	0.92	0
SARS-CoV2 E	Q14697	GANAB	0.00951617	0.03	2.33	0|3|4	0|0|0|0|0|0|0|0|0|0|0	23.33	0.66
SARS-CoV2 E	Q14807	KIF22	0.218426	0.61	3	0|3|6	6|4|4|3|4|4|3|3|4|3|4	0.79	0
SARS-CoV2 E	Q14919	DRAP1	0.08741	0.69	0.33	0|0|1	0|0|0|1|0|0|0|0|0|0|0	3.33	0
SARS-CoV2 E	Q14974	KPNB1	0.00950686	0.69	0.67	0|1|1	0|0|0|0|0|0|0|0|0|0|0	6.67	0
SARS-CoV2 E	Q14978	NOLC1	0.31475	0.64	6.67	6|4|10	7|7|8|9|6|5|5|5|7|5|8	1.02	0
SARS-CoV2 E	Q14980	NUMA1	0.0153049	0.69	0.33	0|0|1	0|0|0|0|0|0|0|0|0|0|0	3.33	0
SARS-CoV2 E	Q15004	PCLAF	0.131714	0.69	0.33	0|0|1	0|0|0|0|0|0|0|0|0|0|0	3.33	0
SARS-CoV2 E	Q15005	SPCS2	0.368355	0.23	1.33	1|2|1	0|0|0|0|0|0|0|0|0|0|0	13.33	0.32
SARS-CoV2 E	Q15059	BRD3	0.733424	0.11	1.67	1|2|2	0|0|0|1|0|0|0|0|0|0|1	9.17	0.59
SARS-CoV2 E	Q15084	PDIA6	0.323355	0.69	2.67	2|3|3	7|6|7|6|7|3|4|4|2|4|5	0.53	0
SARS-CoV2 E	Q15181	PPA1	0.219815	0.46	1	0|1|2	1|1|0|1|2|1|2|1|1|0|0	1.1	0.08
SARS-CoV2 E	Q15233	NONO	0.206623	0.69	2.33	0|3|4	4|5|9|7|2|1|2|1|4|5|6	0.56	0
SARS-CoV2 E	Q15262	PTPRK	0.0388444	0.69	0.33	0|0|1	1|0|1|0|0|0|0|1|0|1|0	0.92	0
SARS-CoV2 E	Q15287	RNPS1	0.454129	0.4	1.33	1|1|2	0|1|2|2|0|0|0|0|1|0|0	2.44	0.17
SARS-CoV2 E	Q15365	PCBP1	0.329423	0.69	8.33	5|10|10	13|13|10|12|13|10|11|11|9|9|5	0.79	0
SARS-CoV2 E	Q15366	PCBP2	0.325738	0.65	4.67	2|5|7	6|7|7|7|6|5|6|4|7|3|6	0.8	0
SARS-CoV2 E	Q15370	ELOB	0.249496	0.69	0.67	0|1|1	0|0|0|0|0|0|0|0|0|0|0	6.67	0
SARS-CoV2 E	Q15392	DHCR24	0.0152056	0.69	0.33	0|0|1	0|0|0|0|0|0|0|0|0|0|0	3.33	0
SARS-CoV2 E	Q15393	SF3B3	0.185607	0.53	1.33	0|1|3	2|1|3|2|1|2|1|0|3|0|4	0.77	0.02
SARS-CoV2 E	Q15417	CNN3	0.332785	0.63	3	2|3|4	6|2|4|4|4|3|2|4|5|3|3	0.83	0
SARS-CoV2 E	Q15424	SAFB	0.240017	0.42	1	0|2|1	0|3|3|1|0|0|0|0|1|0|0	1.38	0.14
SARS-CoV2 E	Q15427	SF3B4	0.0411343	0.69	0.33	0|0|1	0|0|0|0|0|0|0|0|0|0|0	3.33	0
SARS-CoV2 E	Q15428	SF3A2	0.047217	0.69	0.33	0|0|1	0|0|0|0|1|0|0|0|0|0|0	3.33	0
SARS-CoV2 E	Q15464	SHB	0.0656715	0.36	0.67	0|0|2	1|0|1|0|0|0|0|0|2|0|0	1.83	0.23
SARS-CoV2 E	Q15629	TRAM1	0.213122	0.69	0.67	1|1|0	0|0|0|0|0|0|0|0|0|0|0	6.67	0
SARS-CoV2 E	Q15637	SF1	0.337861	0.66	10	6|13|11	11|9|6|7|13|8|5|7|15|7|7	1.16	0
SARS-CoV2 E	Q15645	TRIP13	0.00440623	0.69	0.33	0|0|1	0|0|0|0|0|0|0|0|0|0|0	3.33	0
SARS-CoV2 E	Q15717	ELAVL1	0.0114666	0.69	0.33	0|0|1	0|1|4|2|0|0|0|0|2|0|0	0.41	0
SARS-CoV2 E	Q15758	SLC1A5	0.00538907	0.69	0.33	0|0|1	0|0|0|0|0|0|0|0|0|0|0	3.33	0
SARS-CoV2 E	Q15785	TOMM34	0.26361	0.22	1.33	0|1|3	0|0|0|1|0|0|0|0|0|1|0	7.33	0.33
SARS-CoV2 E	Q16527	CSRP2	0.329586	0.67	7.33	5|8|9	9|10|11|11|8|9|5|9|13|2|2	0.91	0
SARS-CoV2 E	Q16531	DDB1	0.313907	0.19	1.33	1|3|0	0|0|0|0|0|0|0|0|0|0|0	13.33	0.33
SARS-CoV2 E	Q16629	SRSF7	0.243884	0.35	1.67	0|2|3	1|3|2|2|1|0|0|0|1|0|0	1.83	0.25
SARS-CoV2 E	Q16630	CPSF6	0.222501	0.4	5.33	0|9|7	5|5|3|6|2|4|0|3|1|4|4	1.59	0.17
SARS-CoV2 E	Q16763	UBE2S	0.377667	0.05	2	0|2|4	0|0|0|0|0|0|0|0|0|0|0	20	0.65
SARS-CoV2 E	Q2NL82	TSR1	0.266795	0.11	1.67	0|3|2	0|0|0|2|0|0|0|0|0|0|0	9.17	0.61
SARS-CoV2 E	Q2TAY7	SMU1	0.0858283	0.33	0.67	0|2|0	0|0|0|2|0|0|0|0|0|0|0	3.67	0.29
SARS-CoV2 E	Q2TBE0	CWF19L2	0.197425	0.69	0.67	1|0|1	0|2|1|3|2|1|0|1|1|4|3	0.41	0
SARS-CoV2 E	Q3B726	TWISTNB	0.193599	0.39	1.33	0|1|3	0|0|1|2|1|1|0|1|2|0|2	1.47	0.18
SARS-CoV2 E	Q3MHD2	LSM12	0.210111	0.43	1	0|1|2	1|0|1|1|1|1|0|1|1|0|1	1.38	0.12
SARS-CoV2 E	Q3ZCM7	TUBB8	0.205274	0.43	1.33	0|2|2	1|1|2|2|3|0|0|0|2|0|0	1.33	0.12
SARS-CoV2 E	Q3ZCQ8	TIMM50	0.306636	0.32	1.33	1|1|2	0|0|0|0|0|0|0|1|0|1|0	7.33	0.3
SARS-CoV2 E	Q4KMP7	TBC1D10B	0.222688	0.14	1.67	0|3|2	1|0|0|1|1|0|1|0|0|1|1	3.06	0.43
SARS-CoV2 E	Q53GQ0	HSD17B12	0.18796	0.23	1	0|2|1	0|0|0|0|0|0|0|0|0|0|0	10	0.32
SARS-CoV2 E	Q53GS9	USP39	0.163467	0.23	0.67	0|0|2	0|0|0|0|0|0|0|0|0|0|0	6.67	0.32
SARS-CoV2 E	Q53H12	AGK	0.00367982	0.69	0.33	0|0|1	0|0|0|0|0|0|0|0|0|0|0	3.33	0
SARS-CoV2 E	Q5BKY9	FAM133B	0.321768	0.69	1.67	1|2|2	1|5|4|5|6|4|6|6|2|0|4	0.43	0
SARS-CoV2 E	Q5HYJ3	FAM76B	0.208986	0.69	0.67	0|1|1	1|1|2|1|2|1|0|2|3|1|0	0.52	0
SARS-CoV2 E	Q5MNZ6	WDR45B	0.272838	0.69	0.67	0|1|1	0|0|1|0|0|0|0|0|1|1|2	1.47	0
SARS-CoV2 E	Q5T3I0	GPATCH4	0.0193085	0.69	0.33	0|0|1	0|0|0|0|0|0|0|0|0|1|0	3.33	0
SARS-CoV2 E	Q5T440	IBA57	0.310234	0.69	3.33	3|3|4	10|7|4|5|4|4|2|3|5|5|6	0.67	0
SARS-CoV2 E	Q5VTL8	PRPF38B	0.321934	0.69	8	6|8|10	10|11|10|12|13|12|11|12|13|4|10	0.75	0
SARS-CoV2 E	Q66PJ3	ARL6IP4	0.328528	0.62	3	1|4|4	2|3|9|5|4|4|2|2|4|2|2	0.85	0
SARS-CoV2 E	Q6DCA0	AMMECR1L	0.209554	0.69	0.67	0|1|1	1|1|2|2|1|1|0|1|2|2|1	0.52	0
SARS-CoV2 E	Q6FI81	CIAPIN1	0.326673	0.54	1.33	1|1|2	2|1|2|3|0|1|1|2|1|2|1	0.92	0.01
SARS-CoV2 E	Q6IQ49	SDE2	0.340474	0.46	1.67	1|1|3	2|1|2|1|0|1|1|0|3|2|1	1.31	0.09
SARS-CoV2 E	Q6NTE8	MRNIP	0.0265678	0.69	0.33	0|1|0	1|0|1|1|0|2|0|1|2|0|1	0.41	0
SARS-CoV2 E	Q6NYC1	JMJD6	0.68551	0.69	0.33	0|0|1	0|0|0|0|0|0|0|0|0|0|0	3.33	0
SARS-CoV2 E	Q6P087	RPUSD3	0.324377	0.69	1.67	1|2|2	2|1|7|4|2|1|2|2|6|3|1	0.59	0
SARS-CoV2 E	Q6P1L8	MRPL14	0.307093	0.66	4.33	4|3|6	5|5|7|5|6|6|6|6|6|7|5	0.74	0
SARS-CoV2 E	Q6P1Q9	METTL2B	0.0485288	0.69	0.33	0|0|1	0|0|1|0|0|0|0|0|0|0|0	3.33	0
SARS-CoV2 E	Q6P1X5	TAF2	0.0128038	0.69	0.33	0|0|1	1|0|0|0|2|1|0|0|0|2|1	0.52	0
SARS-CoV2 E	Q6P4A7	SFXN4	0.00923175	0.69	0.33	0|0|1	0|0|0|0|0|0|0|0|0|0|0	3.33	0
SARS-CoV2 E	Q6P5R6	RPL22L1	0.325851	0.69	1.67	1|2|2	4|3|2|2|4|2|1|3|3|2|2	0.65	0
SARS-CoV2 E	Q6P6C2	ALKBH5	0.02303	0.69	0.33	0|0|1	1|0|0|0|0|0|0|0|0|1|1	1.22	0
SARS-CoV2 E	Q6PK04	CCDC137	0.0219313	0.69	0.33	0|0|1	0|0|1|1|0|1|1|0|1|0|0	0.73	0
SARS-CoV2 E	Q6UN15	FIP1L1	0.291114	0.33	1.33	0|2|2	1|1|1|1|0|1|0|0|0|1|1	2.1	0.29
SARS-CoV2 E	Q6UX04	CWC27	0.893109	0.03	2.67	1|4|3	0|0|0|0|0|0|0|0|0|0|0	26.67	0.66
SARS-CoV2 E	Q6ZUT1	NKAPD1	0.215204	0.57	2	0|2|4	3|4|2|3|1|0|2|3|4|2|4	0.79	0.01
SARS-CoV2 E	Q70Z53	FRA10AC1	0.195977	0.52	2.33	0|2|5	3|1|2|5|4|3|1|2|3|1|2	0.95	0.03
SARS-CoV2 E	Q71UM5	RPS27L	0.210084	0.54	1.33	0|2|2	1|2|3|2|3|2|1|1|3|0|0	0.81	0.02
SARS-CoV2 E	Q7L014	DDX46	0.311045	0.68	15.67	3|21|23	14|16|20|25|21|14|9|20|19|14|13	0.93	0
SARS-CoV2 E	Q7L3T8	PARS2	0.0149161	0.69	0.33	0|1|0	1|1|4|2|0|0|0|2|0|1|1	0.31	0
SARS-CoV2 E	Q7L4I2	RSRC2	0.334223	0.62	4.67	2|7|5	4|4|6|6|5|4|4|4|5|3|6	1.01	0
SARS-CoV2 E	Q7Z417	NUFIP2	0.231534	0.39	1.67	0|2|3	2|1|1|0|1|0|2|1|1|2|1	1.53	0.18
SARS-CoV2 E	Q7Z5L9	IRF2BP2	0.353449	0.55	10.33	5|12|14	7|8|6|4|2|6|7|7|12|6|5	1.62	0.01
SARS-CoV2 E	Q7Z739	YTHDF3	0.19325	0.69	0.33	0|1|0	0|0|0|0|0|0|0|0|1|0|0	3.33	0
SARS-CoV2 E	Q7Z7K0	CMC1	0.32139	0.55	1.33	1|1|2	4|1|1|0|1|3|2|0|2|2|1	0.86	0.01
SARS-CoV2 E	Q86SX6	GLRX5	0.236405	0.69	0.67	0|1|1	1|0|2|2|0|0|0|0|0|0|1	1.22	0
SARS-CoV2 E	Q86U28	ISCA2	0.242049	0.69	0.67	0|1|1	3|0|0|0|0|0|0|0|1|2|1	1.05	0
SARS-CoV2 E	Q86U42	PABPN1	0.0433219	0.69	0.33	0|0|1	0|0|0|0|0|0|0|0|3|0|0	1.22	0
SARS-CoV2 E	Q86U90	YRDC	0.19341	0.69	1	0|1|2	4|3|5|5|3|0|0|1|5|1|1	0.39	0
SARS-CoV2 E	Q86UE4	MTDH	0.293597	0.69	0.67	0|1|1	0|0|0|0|0|1|0|0|0|0|0	6.67	0
SARS-CoV2 E	Q86UK7	ZNF598	0.189116	0.32	1.33	0|1|3	2|0|0|1|0|0|0|0|0|1|0	3.67	0.3
SARS-CoV2 E	Q86UY6	NAA40	0.0301728	0.69	0.33	0|0|1	0|1|0|1|1|1|0|1|1|0|0	0.61	0
SARS-CoV2 E	Q86V81	ALYREF	0.306216	0.56	1.67	1|3|1	1|8|3|3|1|0|2|0|4|1|1	0.76	0.01
SARS-CoV2 E	Q86VM9	ZC3H18	0.796415	0	2.67	2|4|2	0|0|0|0|0|0|0|0|0|0|0	26.67	0.97
SARS-CoV2 E	Q86WW8	COA5	0.0183394	0.69	0.33	0|1|0	1|1|0|2|0|0|0|0|2|0|0	0.61	0
SARS-CoV2 E	Q86WX3	RPS19BP1	0.320747	0.53	1.33	1|1|2	2|0|1|2|0|2|3|2|0|2|1	0.98	0.02
SARS-CoV2 E	Q86X95	CIR1	0.205658	0.69	0.67	0|1|1	2|1|2|0|1|2|3|2|1|2|2	0.41	0
SARS-CoV2 E	Q86Y79	PTRH1	0.207863	0.69	0.67	0|1|1	3|2|0|1|2|0|0|0|0|1|1	0.73	0
SARS-CoV2 E	Q8IUF8	RIOX2	0.0845739	0.69	0.33	0|1|0	0|0|0|0|0|0|0|0|0|0|0	3.33	0
SARS-CoV2 E	Q8IWA5	SLC44A2	0.950343	0	2.67	3|3|2	0|0|0|0|0|0|0|0|0|0|0	26.67	0.98
SARS-CoV2 E	Q8IWP9	CCDC28A	0.145196	0.69	0.33	0|0|1	0|0|0|0|0|0|0|0|0|0|0	3.33	0
SARS-CoV2 E	Q8IWQ3	BRSK2	0.343636	0.69	1.67	1|2|2	1|3|2|1|2|2|3|1|3|2|2	0.83	0
SARS-CoV2 E	Q8IWS0	PHF6	0.332239	0.68	15.33	9|17|20	14|16|20|22|22|16|10|18|14|9|5	1.02	0
SARS-CoV2 E	Q8IWX8	CHERP	0.33546	0.68	13	9|15|15	22|20|10|9|12|8|13|9|20|11|10	0.99	0
SARS-CoV2 E	Q8IXB1	DNAJC10	0.28076	0.69	4.33	5|4|4	13|12|14|19|12|9|8|6|15|10|10	0.37	0
SARS-CoV2 E	Q8IY67	RAVER1	0.323464	0.43	2.67	1|2|5	3|3|2|1|1|3|2|2|4|0|0	1.4	0.12
SARS-CoV2 E	Q8IYB3	SRRM1	0.223016	0.42	2	0|3|3	1|1|2|4|2|1|0|0|1|0|3	1.47	0.13
SARS-CoV2 E	Q8IYB5	SMAP1	0.274722	0.55	1.33	2|1|1	1|1|4|4|1|1|1|1|1|1|1	0.86	0.01
SARS-CoV2 E	Q8IYN2	TCEAL8	0.0487241	0.69	0.33	0|0|1	0|0|0|0|0|0|0|1|1|0|0	1.83	0
SARS-CoV2 E	Q8IZQ5	SELENOH	0.334736	0.6	2	1|3|2	3|2|3|4|4|0|3|1|1|4|2	0.81	0
SARS-CoV2 E	Q8N0T1	RBIS	0.21949	0.69	0.67	0|1|1	0|1|0|1|1|0|0|0|0|0|0	2.44	0
SARS-CoV2 E	Q8N1F7	NUP93	0.00226396	0.69	0.33	0|0|1	0|0|0|1|0|0|0|0|0|0|0	3.33	0
SARS-CoV2 E	Q8N1G4	LRRC47	0.227587	0.54	9.67	0|13|16	10|6|5|12|8|10|0|2|6|8|6	1.46	0.02
SARS-CoV2 E	Q8N488	RYBP	0.518791	0.23	0.67	0|2|0	0|0|0|1|0|0|0|0|0|0|0	6.67	0.32
SARS-CoV2 E	Q8N4V1	MMGT1	0.0167373	0.69	0.33	0|0|1	0|0|0|0|0|0|0|0|0|0|0	3.33	0
SARS-CoV2 E	Q8N5F7	NKAP	0.332655	0.6	3.33	3|3|4	2|3|2|5|3|3|3|4|4|1|3	1.11	0
SARS-CoV2 E	Q8N684	CPSF7	0.232693	0.48	2	0|3|3	2|3|0|3|2|2|0|1|1|2|2	1.22	0.06
SARS-CoV2 E	Q8N6N3	C1orf52	0.0609879	0.69	0.33	0|1|0	1|0|0|0|0|0|0|0|0|1|0	1.83	0
SARS-CoV2 E	Q8N6N6	NATD1	0.340524	0.69	1	1|1|1	1|0|1|0|1|1|1|1|1|0|0	1.57	0
SARS-CoV2 E	Q8N999	C12orf29	0.110301	0.69	0.33	0|0|1	0|0|0|1|0|0|0|0|0|0|0	3.33	0
SARS-CoV2 E	Q8N9Q2	SREK1IP1	0.314577	0.67	9.67	9|10|10	7|11|10|13|9|10|10|11|10|2|4	1.1	0
SARS-CoV2 E	Q8NAV1	PRPF38A	0.298277	0.58	2	1|1|4	3|3|1|4|3|3|3|2|4|1|2	0.76	0
SARS-CoV2 E	Q8NBS9	TXNDC5	0.324824	0.64	4	3|3|6	9|3|8|5|5|5|1|5|7|2|2	0.85	0
SARS-CoV2 E	Q8NC51	SERBP1	0.315493	0.62	8	3|14|7	11|9|11|10|4|5|5|6|5|6|8	1.1	0
SARS-CoV2 E	Q8ND56	LSM14A	0.206439	0.39	2	0|4|2	2|2|3|1|3|1|2|1|0|0|0	1.47	0.18
SARS-CoV2 E	Q8NDC0	MAPK1IP1L	0.0395847	0.69	0.33	0|1|0	1|0|0|0|1|0|0|0|1|0|0	1.22	0
SARS-CoV2 E	Q8NDD1	C1orf131	0.209109	0.58	1.67	0|3|2	2|5|4|4|1|1|2|2|1|2|1	0.73	0
SARS-CoV2 E	Q8NE71	ABCF1	0.30302	0.68	9.67	2|10|17	17|15|13|16|15|14|9|9|14|9|12	0.74	0
SARS-CoV2 E	Q8NEZ5	FBXO22	0.20586	0.62	2	0|2|4	3|3|4|4|4|2|2|3|2|3|6	0.61	0
SARS-CoV2 E	Q8NF37	LPCAT1	0.0432665	0.69	0.33	1|0|0	0|0|0|0|0|0|0|0|0|0|0	3.33	0
SARS-CoV2 E	Q8NFW8	CMAS	0.0208917	0.69	0.33	0|0|1	0|0|1|2|2|0|0|0|1|1|2	0.41	0
SARS-CoV2 E	Q8TA86	RP9	0.329375	0.68	11	6|12|15	14|13|16|15|14|11|13|11|19|8|12	0.83	0
SARS-CoV2 E	Q8TAD8	SNIP1	0.244203	0.69	0.67	0|1|1	0|0|0|0|0|0|0|0|0|0|0	6.67	0
SARS-CoV2 E	Q8TAE8	GADD45GIP1	0.0788266	0.36	0.67	0|0|2	0|0|1|1|0|0|0|0|1|1|0	1.83	0.23
SARS-CoV2 E	Q8TAV0	FAM76A	0.218805	0.16	2.67	0|2|6	3|1|0|0|2|2|0|2|1|1|1	2.26	0.35
SARS-CoV2 E	Q8TBB5	KLHDC4	0.0221521	0.69	0.33	0|0|1	0|1|0|1|1|0|0|0|0|0|0	1.22	0
SARS-CoV2 E	Q8TDD1	DDX54	0.023313	0.69	0.33	0|0|1	0|0|0|1|0|0|0|0|0|0|0	3.33	0
SARS-CoV2 E	Q8TEA8	DTD1	0.256205	0.69	0.67	0|1|1	1|1|0|1|1|1|0|0|0|0|0	1.47	0
SARS-CoV2 E	Q8TET4	GANC	0.20811	0.69	0.67	0|1|1	1|2|1|1|0|1|0|1|1|1|1	0.73	0
SARS-CoV2 E	Q8WU90	ZC3H15	0.231998	0.39	1.67	0|2|3	1|1|2|5|1|1|0|0|0|0|1	1.53	0.19
SARS-CoV2 E	Q8WUA2	PPIL4	0.332107	0.67	5.67	4|6|7	8|10|8|11|8|7|2|3|8|4|7	0.82	0
SARS-CoV2 E	Q8WUD4	CCDC12	0.685511	0.69	0.33	0|0|1	0|0|0|0|0|0|0|0|0|0|0	3.33	0
SARS-CoV2 E	Q8WUR7	C15orf40	0.102876	0.69	0.33	0|0|1	0|0|0|1|0|0|0|0|0|1|0	1.83	0
SARS-CoV2 E	Q8WUY1	THEM6	0.0322598	0.69	0.33	0|1|0	0|0|0|0|0|0|0|0|0|0|0	3.33	0
SARS-CoV2 E	Q8WVD3	RNF138	0.0438579	0.35	1	0|0|3	0|1|0|3|0|0|0|0|1|0|1	1.83	0.25
SARS-CoV2 E	Q8WVK2	SNRNP27	0.323419	0.69	5.33	4|6|6	8|4|9|9|8|6|4|6|6|8|7	0.78	0
SARS-CoV2 E	Q8WVM0	TFB1M	0.361977	0.69	0.67	0|1|1	0|0|0|1|0|0|0|0|0|1|1	2.44	0
SARS-CoV2 E	Q8WVV9	HNRNPLL	0.0437204	0.38	0.67	0|2|0	0|0|1|2|0|0|0|0|2|0|0	1.47	0.2
SARS-CoV2 E	Q8WVX9	FAR1	0.331267	0.08	1.67	1|2|2	0|0|0|0|0|0|0|0|0|0|0	16.67	0.64
SARS-CoV2 E	Q8WWK9	CKAP2	0.22248	0.69	0.67	0|1|1	1|0|0|1|1|0|0|1|1|0|0	1.47	0
SARS-CoV2 E	Q8WWM7	ATXN2L	0.0145314	0.4	0.67	0|0|2	0|1|0|1|0|2|0|0|2|0|0	1.22	0.17
SARS-CoV2 E	Q8WXA9	SREK1	0.00738434	0.69	0.33	0|0|1	0|0|3|0|2|0|0|0|2|1|0	0.46	0
SARS-CoV2 E	Q8WXX5	DNAJC9	0.231261	0.44	2	0|3|3	2|4|3|2|0|0|0|3|1|1|0	1.38	0.11
SARS-CoV2 E	Q92499	DDX1	0.230285	0.15	2.33	0|3|4	1|1|0|2|2|1|0|0|1|3|0	2.33	0.4
SARS-CoV2 E	Q92522	H1-10	0.330943	0.61	2	1|2|3	3|4|3|2|4|1|1|2|5|3|2	0.73	0
SARS-CoV2 E	Q92541	RTF1	0.866718	0.69	1	1|1|1	0|0|0|0|0|0|0|0|0|0|0	10	0
SARS-CoV2 E	Q92841	DDX17	0.340332	0.67	11	7|13|13	10|6|15|15|11|6|5|10|9|10|8	1.15	0
SARS-CoV2 E	Q92945	KHSRP	0.323758	0.69	8	7|8|9	15|8|11|6|9|11|5|7|10|12|10	0.85	0
SARS-CoV2 E	Q92979	EMG1	0.0228229	0.69	0.33	0|0|1	0|0|0|0|0|0|0|0|0|0|0	3.33	0
SARS-CoV2 E	Q969M3	YIPF5	0.0188204	0.69	0.33	0|1|0	0|0|0|0|0|0|0|0|0|0|0	3.33	0
SARS-CoV2 E	Q969Q0	RPL36AL	0.207658	0.69	0.67	0|1|1	2|2|0|1|2|2|1|0|1|0|0	0.67	0
SARS-CoV2 E	Q96A33	CCDC47	0.219044	0.69	0.67	0|1|1	0|0|0|0|0|0|0|0|0|0|0	6.67	0
SARS-CoV2 E	Q96AE4	FUBP1	0.0275423	0.69	0.33	1|0|0	0|1|1|0|0|1|1|1|1|1|1	0.46	0
SARS-CoV2 E	Q96AG4	LRRC59	0.336081	0.42	6.67	2|9|9	5|5|3|5|6|5|1|3|3|3|2	1.79	0.13
SARS-CoV2 E	Q96BH1	RNF25	0.035899	0.39	0.67	0|0|2	1|0|1|0|1|0|1|0|0|0|1	1.47	0.19
SARS-CoV2 E	Q96BK5	PINX1	0.210361	0.69	0.67	0|1|1	1|0|2|2|2|1|1|1|1|1|1	0.56	0
SARS-CoV2 E	Q96C57	C12orf43	0.262271	0.69	0.67	0|1|1	0|0|0|2|0|0|0|0|0|0|0	3.67	0
SARS-CoV2 E	Q96CP2	FLYWCH2	0.0184431	0.69	0.33	0|1|0	1|0|1|1|1|1|0|1|1|1|0	0.46	0
SARS-CoV2 E	Q96CS3	FAF2	0.381957	0	6	5|7|6	0|0|0|0|0|0|0|0|0|0|0	60	1
SARS-CoV2 E	Q96CT7	CCDC124	0.30455	0.68	11.33	2|15|17	12|16|12|18|17|11|6|9|15|9|10	0.92	0
SARS-CoV2 E	Q96E11	MRRF	0.235134	0.14	3.33	0|6|4	2|2|1|5|0|0|0|0|0|4|1	2.44	0.42
SARS-CoV2 E	Q96EI5	TCEAL4	0.0170263	0.69	0.33	0|1|0	0|0|1|1|0|0|0|0|0|0|0	1.83	0
SARS-CoV2 E	Q96EV2	RBM33	0.015187	0.69	0.33	0|0|1	1|1|0|0|1|1|1|0|1|1|1	0.46	0
SARS-CoV2 E	Q96EY1	DNAJA3	0.348889	0.05	2.33	1|3|3	0|0|0|1|0|0|0|1|0|0|0	12.83	0.65
SARS-CoV2 E	Q96EY4	TMA16	0.330862	0.69	6.67	3|8|9	11|8|11|10|9|7|10|9|12|8|10	0.7	0
SARS-CoV2 E	Q96H79	ZC3HAV1L	0.337981	0.63	7.33	4|8|10	6|4|10|8|6|5|3|6|10|3|4	1.24	0
SARS-CoV2 E	Q96HR8	NAF1	0.545272	0.69	0.67	1|0|1	0|0|0|0|0|0|0|0|0|0|0	6.67	0
SARS-CoV2 E	Q96HS1	PGAM5	0.00601836	0.69	0.33	0|0|1	0|0|0|0|0|0|0|0|0|0|0	3.33	0
SARS-CoV2 E	Q96I24	FUBP3	0.338296	0.68	26.67	17|28|35	23|25|26|20|18|24|17|15|21|24|18	1.27	0
SARS-CoV2 E	Q96I25	RBM17	0.304018	0.67	5.67	1|7|9	8|13|6|5|4|8|10|4|13|6|8	0.73	0
SARS-CoV2 E	Q96IX5	ATP5MD	0.19641	0.23	1	0|2|1	0|0|0|0|0|0|0|0|0|0|0	10	0.32
SARS-CoV2 E	Q96IZ7	RSRC1	0.347486	0.57	1.67	1|2|2	2|2|3|0|1|3|2|1|4|1|2	0.87	0.01
SARS-CoV2 E	Q96J01	THOC3	0.0130917	0.52	1.33	0|0|4	2|4|1|0|2|1|3|0|4|3|3	0.64	0.03
SARS-CoV2 E	Q96K37	SLC35E1	0.0259209	0.69	0.33	1|0|0	0|0|0|0|0|0|0|0|0|0|0	3.33	0
SARS-CoV2 E	Q96MN5	TCEANC2	0.207698	0.69	0.67	0|1|1	2|1|2|2|1|1|0|1|3|1|1	0.49	0
SARS-CoV2 E	Q96NC0	ZMAT2	0.231145	0.34	2	0|2|4	0|1|2|0|3|1|1|2|1|0|1	1.83	0.27
SARS-CoV2 E	Q96P16	RPRD1A	0.0502854	0.69	0.33	0|1|0	0|0|0|0|0|0|0|0|0|0|0	3.33	0
SARS-CoV2 E	Q96P70	IPO9	0.198576	0.69	0.67	1|0|1	0|0|0|0|0|0|0|0|0|0|0	6.67	0
SARS-CoV2 E	Q96PK6	RBM14	0.154733	0.4	1.67	0|1|4	0|6|5|3|0|0|0|0|0|1|0	1.22	0.17
SARS-CoV2 E	Q96RQ3	MCCC1	0.342868	0.68	18	8|23|23	34|23|11|8|3|14|15|1|28|20|22	1.11	0
SARS-CoV2 E	Q96T17	MAP7D2	0.217417	0.69	0.67	0|1|1	2|1|0|1|0|1|0|1|2|1|0	0.81	0
SARS-CoV2 E	Q96T37	RBM15	0.0283208	0.69	0.33	0|0|1	0|0|1|1|0|0|0|0|0|0|0	1.83	0
SARS-CoV2 E	Q99459	CDC5L	0.00960222	0.69	0.33	0|0|1	0|1|1|0|0|0|0|0|1|0|0	1.22	0
SARS-CoV2 E	Q99497	PARK7	0.328381	0.69	17	9|19|23	35|20|25|24|17|18|21|17|29|15|18	0.78	0
SARS-CoV2 E	Q99543	DNAJC2	0.325451	0.69	0.67	0|1|1	0|0|0|2|0|0|0|0|0|0|0	3.67	0
SARS-CoV2 E	Q99615	DNAJC7	0.411009	0	6.33	5|5|9	0|0|0|1|0|0|1|0|1|0|1	17.42	1
SARS-CoV2 E	Q99623	PHB2	0.317956	0.66	5.67	5|7|5	7|8|6|9|5|3|4|8|4|6|6	0.94	0
SARS-CoV2 E	Q99643	SDHC	0.879836	0.08	1.33	0|2|2	0|0|0|0|0|0|0|0|0|0|0	13.33	0.64
SARS-CoV2 E	Q99661	KIF2C	0.0369572	0.35	0.67	0|0|2	1|0|0|2|0|0|0|0|0|0|0	2.44	0.26
SARS-CoV2 E	Q99729	HNRNPAB	0.0253214	0.69	0.33	0|0|1	0|2|2|2|0|0|0|0|1|0|0	0.52	0
SARS-CoV2 E	Q99942	RNF5	0.378624	0.69	1	1|1|1	0|0|0|0|0|0|0|0|0|0|0	10	0
SARS-CoV2 E	Q99986	VRK1	0.272892	0.11	2.67	0|4|4	0|1|0|4|0|0|0|0|0|0|0	5.87	0.59
SARS-CoV2 E	Q9BQ61	TRIR	0.325733	0.17	1.67	2|1|2	0|0|2|1|0|0|1|0|1|1|0	3.06	0.34
SARS-CoV2 E	Q9BQ69	MACROD1	0.204701	0.46	1	0|1|2	1|2|0|2|1|1|0|0|1|1|1	1.1	0.08
SARS-CoV2 E	Q9BQB6	VKORC1	0.370303	0.69	1	1|1|1	0|0|0|0|0|0|0|0|0|0|0	10	0
SARS-CoV2 E	Q9BQE4	SELENOS	0.292782	0.69	0.67	1|1|0	0|0|0|0|0|0|0|0|0|0|0	6.67	0
SARS-CoV2 E	Q9BQG0	MYBBP1A	0.202121	0.69	0.67	0|1|1	0|0|0|0|1|0|0|0|0|0|0	6.67	0
SARS-CoV2 E	Q9BRJ7	NUDT16L1	0.339273	0.55	3.33	2|4|4	1|3|4|2|4|2|2|2|2|2|4	1.31	0.01
SARS-CoV2 E	Q9BRP1	PDCD2L	0.203198	0.69	0.67	0|1|1	2|2|2|2|3|2|2|2|1|1|3	0.33	0
SARS-CoV2 E	Q9BRP8	PYM1	0.201606	0.41	1.33	0|1|3	0|1|1|6|1|1|0|0|0|1|1	1.22	0.15
SARS-CoV2 E	Q9BRS2	RIOK1	0.206135	0.37	1.33	0|1|3	0|1|1|2|1|0|0|2|0|0|1	1.83	0.22
SARS-CoV2 E	Q9BRX2	PELO	0.285359	0.64	6	8|5|5	7|4|8|11|5|5|3|5|6|5|5	1.03	0
SARS-CoV2 E	Q9BSD7	NTPCR	0.332564	0.66	7.33	6|7|9	8|6|10|8|7|7|5|8|9|6|5	1.02	0
SARS-CoV2 E	Q9BSH4	TACO1	0.23432	0.36	1	0|2|1	0|0|0|2|0|0|0|0|0|1|1	2.75	0.23
SARS-CoV2 E	Q9BSH5	HDHD3	0.0407394	0.69	0.33	0|1|0	1|0|0|1|1|0|0|0|1|0|0	0.92	0
SARS-CoV2 E	Q9BT17	MTG1	0.0129913	0.69	0.33	0|0|1	1|0|1|1|2|0|0|0|1|1|0	0.52	0
SARS-CoV2 E	Q9BTE3	MCMBP	0.226987	0.69	0.67	0|1|1	1|0|1|0|0|0|0|0|2|0|1	1.47	0
SARS-CoV2 E	Q9BTE7	DCUN1D5	0.202967	0.69	0.67	0|1|1	2|2|2|2|2|1|1|0|2|0|1	0.49	0
SARS-CoV2 E	Q9BU76	C1orf35	0.302221	0.69	7.33	8|6|8	10|9|11|10|8|8|8|8|11|6|8	0.83	0
SARS-CoV2 E	Q9BUF5	TUBB6	0.279343	0.08	1.67	2|1|2	0|0|0|0|0|0|0|0|0|0|0	16.67	0.64
SARS-CoV2 E	Q9BV68	RNF126	0.366042	0.23	1.33	2|1|1	0|0|0|0|0|0|0|0|0|0|0	13.33	0.32
SARS-CoV2 E	Q9BVP2	GNL3	0.232152	0.05	1.67	0|3|2	0|1|0|0|0|0|0|0|0|0|0	16.67	0.65
SARS-CoV2 E	Q9BW19	KIFC1	0.216064	0.69	0.67	0|1|1	1|0|1|0|0|0|0|0|1|2|1	1.22	0
SARS-CoV2 E	Q9BWE0	REPIN1	0.0142884	0.69	0.33	0|0|1	1|1|1|1|1|0|1|0|3|2|1	0.31	0
SARS-CoV2 E	Q9BWS9	CHID1	0.0215361	0.44	1	0|0|3	2|2|1|4|0|0|0|0|1|2|1	0.85	0.11
SARS-CoV2 E	Q9BXP5	SRRT	0.295426	0.69	0.67	0|1|1	0|0|0|1|0|0|0|0|0|0|0	6.67	0
SARS-CoV2 E	Q9BXS6	NUSAP1	0.0281725	0.69	0.33	0|0|1	0|0|0|0|0|0|0|0|0|0|0	3.33	0
SARS-CoV2 E	Q9BY42	RTF2	0.31574	0.69	2	2|2|2	2|3|4|3|3|1|2|1|3|3|2	0.81	0
SARS-CoV2 E	Q9BY44	EIF2A	0.285517	0.12	3	0|4|5	0|0|0|6|1|1|0|0|0|1|0	3.67	0.53
SARS-CoV2 E	Q9BY77	POLDIP3	0.21143	0.17	2.33	0|5|2	2|2|1|3|1|0|0|0|1|1|1	2.14	0.34
SARS-CoV2 E	Q9BYB4	GNB1L	0.322901	0.66	4.67	2|4|8	8|7|5|11|10|10|4|5|7|1|3	0.72	0
SARS-CoV2 E	Q9BYC8	MRPL32	0.317176	0.69	1	1|1|1	1|1|0|2|0|1|2|0|1|0|1	1.22	0
SARS-CoV2 E	Q9BYG3	NIFK	0.0179149	0.69	0.33	0|0|1	0|0|0|0|0|0|0|0|0|0|0	3.33	0
SARS-CoV2 E	Q9BZE4	GTPBP4	0.190564	0.46	2.67	0|2|6	1|4|5|3|5|2|1|3|3|0|0	1.09	0.08
SARS-CoV2 E	Q9BZI7	UPF3B	0.23134	0.44	1.33	0|2|2	0|2|0|2|4|0|0|1|1|1|1	1.22	0.1
SARS-CoV2 E	Q9BZX2	UCK2	0.222648	0.23	1	0|2|1	0|0|0|0|0|0|0|0|0|0|0	10	0.32
SARS-CoV2 E	Q9GZP4	PITHD1	0.205362	0.69	0.67	0|1|1	3|2|2|1|1|1|2|1|2|0|1	0.46	0
SARS-CoV2 E	Q9GZT9	EGLN1	0.0333081	0.69	0.33	0|0|1	0|0|1|0|1|0|0|0|0|0|0	1.83	0
SARS-CoV2 E	Q9H0C8	ILKAP	0.219407	0.42	1	0|1|2	2|2|1|0|0|0|0|0|1|1|0	1.57	0.14
SARS-CoV2 E	Q9H0D6	XRN2	0.00898174	0.69	0.33	0|0|1	0|1|0|0|0|0|0|1|0|0|1	1.22	0
SARS-CoV2 E	Q9H0S4	DDX47	0.335747	0.44	3.33	1|4|5	2|3|2|2|4|1|0|3|2|1|3	1.59	0.1
SARS-CoV2 E	Q9H1B7	IRF2BPL	0.0423146	0.69	0.33	0|0|1	0|0|0|0|0|0|0|0|0|0|0	3.33	0
SARS-CoV2 E	Q9H1E3	NUCKS1	0.217266	0.43	1	0|2|1	1|1|0|3|1|0|0|0|1|1|0	1.38	0.12
SARS-CoV2 E	Q9H1K1	ISCU	0.0129286	0.69	0.33	0|0|1	1|0|2|0|0|0|0|0|1|0|0	0.92	0
SARS-CoV2 E	Q9H257	CARD9	0.017018	0.69	0.33	0|1|0	1|0|0|0|0|0|0|0|0|0|1	1.83	0
SARS-CoV2 E	Q9H2K0	MTIF3	0.21369	0.69	0.67	0|1|1	1|0|0|0|2|1|0|0|2|1|1	0.92	0
SARS-CoV2 E	Q9H2U1	DHX36	0.218837	0.69	0.67	0|1|1	0|0|3|1|0|0|0|0|2|0|3	0.81	0
SARS-CoV2 E	Q9H2W6	MRPL46	0.0498056	0.69	0.33	0|0|1	0|0|0|1|0|0|0|0|0|1|0	1.83	0
SARS-CoV2 E	Q9H307	PNN	0.377957	0.35	2.33	1|5|1	0|2|4|3|0|2|1|0|0|0|1	1.97	0.26
SARS-CoV2 E	Q9H3J6	C12orf65	0.0129211	0.69	0.33	0|1|0	1|1|1|1|0|1|0|1|1|0|2	0.41	0
SARS-CoV2 E	Q9H3K6	BOLA2	0.331885	0.65	4.33	3|5|5	5|5|7|6|5|4|4|5|5|3|4	0.9	0
SARS-CoV2 E	Q9H3N1	TMX1	0.426358	0.69	1	1|1|1	0|0|0|0|0|0|0|0|0|0|0	10	0
SARS-CoV2 E	Q9H5V9	CXorf56	0.0414573	0.41	0.67	0|0|2	0|0|1|0|0|1|0|1|1|2|1	1.05	0.15
SARS-CoV2 E	Q9H773	DCTPP1	0.00504555	0.69	0.33	0|0|1	0|0|0|0|1|0|0|0|1|0|0	1.83	0
SARS-CoV2 E	Q9H7C9	AAMDC	0.204717	0.69	0.67	0|1|1	3|2|2|1|2|3|3|1|3|3|2	0.29	0
SARS-CoV2 E	Q9H7S9	ZNF703	0.0194135	0.69	0.33	0|0|1	0|0|0|0|0|0|0|0|1|0|0	3.33	0
SARS-CoV2 E	Q9H857	NT5DC2	0.0108867	0.59	1	0|0|3	6|0|7|2|4|1|0|2|0|2|3	0.41	0
SARS-CoV2 E	Q9H875	PRKRIP1	0.051917	0.69	0.33	0|0|1	0|0|0|0|0|0|0|0|0|0|0	3.33	0
SARS-CoV2 E	Q9H936	SLC25A22	0.29747	0.69	1	1|1|1	0|0|0|0|0|0|0|0|0|0|0	10	0
SARS-CoV2 E	Q9H9A6	LRRC40	0.0168706	0.54	0.67	0|0|2	3|1|3|1|1|0|0|1|3|2|1	0.46	0.01
SARS-CoV2 E	Q9HA64	FN3KRP	0.335085	0.69	2.33	1|3|3	5|4|5|4|5|3|3|3|4|2|3	0.63	0
SARS-CoV2 E	Q9HB71	CACYBP	0.312621	0.39	9	2|10|15	4|8|4|13|5|4|4|4|5|4|5	1.65	0.18
SARS-CoV2 E	Q9HBI0	PARVG	0.00998978	0.69	0.33	0|0|1	0|0|1|1|1|1|1|1|1|0|1	0.46	0
SARS-CoV2 E	Q9HC38	GLOD4	0.346198	0.57	2.33	1|3|3	2|4|2|1|1|2|2|2|4|3|3	0.99	0.01
SARS-CoV2 E	Q9HCC0	MCCC2	0.346975	0.67	18.67	12|25|19	32|21|9|4|3|14|11|4|24|18|17	1.31	0
SARS-CoV2 E	Q9HCG8	CWC22	0.378836	0.16	4.67	2|8|4	3|3|3|3|0|2|2|0|3|0|2	2.44	0.36
SARS-CoV2 E	Q9HCJ3	RAVER2	0.285699	0.34	1	0|1|2	1|1|0|0|0|0|0|0|1|0|0	3.67	0.26
SARS-CoV2 E	Q9HCU5	PREB	0.510633	0	3.67	2|4|5	0|0|0|0|0|0|0|0|0|0|0	36.67	0.99
SARS-CoV2 E	Q9HD42	CHMP1A	0.199422	0.69	1	0|1|2	2|1|3|2|2|2|1|1|2|3|3	0.5	0
SARS-CoV2 E	Q9HD45	TM9SF3	0.0515024	0.23	0.67	0|2|0	0|0|0|0|0|0|0|0|0|0|0	6.67	0.32
SARS-CoV2 E	Q9NP64	ZCCHC17	0.320877	0.69	6.67	5|8|7	9|15|10|13|9|9|11|12|17|4|7	0.63	0
SARS-CoV2 E	Q9NPA8	ENY2	0.392754	0.16	2	1|2|3	1|0|1|1|0|1|0|0|2|0|1	3.14	0.38
SARS-CoV2 E	Q9NQ29	LUC7L	0.322434	0.69	3.67	3|4|4	5|4|5|4|6|5|4|5|4|5|3	0.81	0
SARS-CoV2 E	Q9NQ50	MRPL40	0.0588107	0.69	0.33	0|0|1	0|0|0|0|0|0|0|0|0|0|1	3.33	0
SARS-CoV2 E	Q9NQZ6	ZC4H2	0.035774	0.69	0.33	0|1|0	3|1|0|0|0|0|1|0|3|1|2	0.33	0
SARS-CoV2 E	Q9NR30	DDX21	0.173798	0.43	1.33	0|1|3	0|5|6|0|0|0|0|0|3|0|0	1.05	0.12
SARS-CoV2 E	Q9NR50	EIF2B3	0.085735	0.69	0.33	0|0|1	0|0|0|0|0|0|0|0|0|0|0	3.33	0
SARS-CoV2 E	Q9NRP0	OSTC	0.0637269	0.69	0.33	1|0|0	0|0|0|0|0|0|0|0|0|0|0	3.33	0
SARS-CoV2 E	Q9NRW3	APOBEC3C	0.0119277	0.69	0.33	0|1|0	2|1|2|3|1|1|1|1|2|0|0	0.26	0
SARS-CoV2 E	Q9NRX1	PNO1	0.229249	0.43	1.33	0|2|2	1|1|1|3|1|0|0|0|1|2|1	1.33	0.12
SARS-CoV2 E	Q9NRZ9	HELLS	0.139413	0.19	1	0|0|3	0|0|0|1|0|0|0|0|0|0|0	10	0.33
SARS-CoV2 E	Q9NS86	LANCL2	0.31684	0.69	1.33	1|1|2	1|2|3|3|3|3|2|3|2|0|2	0.61	0
SARS-CoV2 E	Q9NSD9	FARSB	0.00900242	0.69	0.33	0|1|0	4|1|0|0|1|0|0|0|2|5|2	0.24	0
SARS-CoV2 E	Q9NSV4	DIAPH3	0.205522	0.47	3.33	0|3|7	5|3|4|1|3|3|2|1|3|3|4	1.15	0.07
SARS-CoV2 E	Q9NTJ3	SMC4	0.341478	0.39	1.33	1|1|2	1|0|1|0|1|0|1|0|0|0|1	2.93	0.19
SARS-CoV2 E	Q9NUI1	DECR2	0.0106319	0.69	0.33	0|0|1	2|0|0|2|0|0|0|0|1|1|0	0.61	0
SARS-CoV2 E	Q9NV06	DCAF13	0.344188	0.69	0.67	0|1|1	0|0|0|0|0|0|0|0|0|0|0	6.67	0
SARS-CoV2 E	Q9NVI7	ATAD3A	0.335304	0	3.33	3|4|3	0|0|0|0|0|0|0|0|0|0|0	33.33	1
SARS-CoV2 E	Q9NVN8	GNL3L	0.21993	0.31	2.33	0|2|5	0|1|1|4|4|0|1|0|0|0|1	2.14	0.32
SARS-CoV2 E	Q9NVP1	DDX18	0.00822722	0.69	0.33	0|0|1	0|3|2|2|1|0|0|0|0|0|0	0.46	0
SARS-CoV2 E	Q9NW64	RBM22	0.0345008	0.34	0.67	0|0|2	0|0|1|1|0|0|0|0|1|0|0	2.44	0.26
SARS-CoV2 E	Q9NWB6	ARGLU1	0.308027	0.63	4.67	5|5|4	7|3|3|4|3|5|5|3|6|2|5	1.12	0
SARS-CoV2 E	Q9NWT1	PAK1IP1	0.213112	0.69	0.67	0|1|1	0|2|3|2|2|1|0|1|0|1|0	0.61	0
SARS-CoV2 E	Q9NWW5	CLN6	0.340608	0.23	1.33	1|2|1	0|0|0|0|0|0|0|0|0|0|0	13.33	0.32
SARS-CoV2 E	Q9NX24	NHP2	0.333508	0.69	1	1|1|1	0|1|2|2|1|3|0|1|0|1|0	1	0
SARS-CoV2 E	Q9NX58	LYAR	0.18696	0.63	2	0|4|2	4|6|2|3|4|2|1|4|5|2|5	0.58	0
SARS-CoV2 E	Q9NXE8	CWC25	0.324572	0.69	2	1|3|2	5|3|7|3|3|3|3|2|2|2|2	0.63	0
SARS-CoV2 E	Q9NY12	GAR1	0.0144668	0.69	0.33	0|1|0	0|0|0|1|0|0|0|0|0|0|0	3.33	0
SARS-CoV2 E	Q9NY93	DDX56	0.202543	0.48	1	0|1|2	1|2|1|1|1|1|1|1|1|0|1	1	0.06
SARS-CoV2 E	Q9NYF8	BCLAF1	0.204032	0.69	0.67	0|1|1	0|2|3|8|2|2|1|0|2|0|2	0.33	0
SARS-CoV2 E	Q9NYP9	MIS18A	0.311398	0.69	1.33	1|2|1	3|4|3|1|2|2|2|0|3|1|2	0.64	0
SARS-CoV2 E	Q9NZ01	TECR	0.352709	0	3.67	2|4|5	0|0|0|0|0|0|0|0|0|0|0	36.67	0.99
SARS-CoV2 E	Q9NZI8	IGF2BP1	0.00461165	0.69	0.33	0|0|1	0|5|4|1|0|0|0|0|2|0|0	0.31	0
SARS-CoV2 E	Q9NZW5	MPP6	0.0142106	0.69	0.33	0|0|1	1|0|3|0|0|0|0|1|1|2|2	0.37	0
SARS-CoV2 E	Q9P003	CNIH4	0.350516	0.69	1	1|1|1	0|0|0|0|0|0|0|0|0|0|0	10	0
SARS-CoV2 E	Q9P016	THYN1	0.328611	0.69	4.33	3|5|5	7|4|8|4|5|6|6|7|7|4|4	0.77	0
SARS-CoV2 E	Q9P021	CRIPT	0.202329	0.52	1.67	0|3|2	2|0|4|3|1|0|3|2|2|1|1	0.96	0.03
SARS-CoV2 E	Q9P031	CCDC59	0.0133002	0.69	0.33	0|0|1	0|0|1|2|2|1|0|1|1|0|1	0.41	0
SARS-CoV2 E	Q9P035	HACD3	0.310664	0.19	1.67	1|3|1	0|0|0|0|0|0|0|0|0|0|0	16.67	0.33
SARS-CoV2 E	Q9P258	RCC2	0.328926	0.68	17.67	6|22|25	20|20|19|29|20|15|14|19|17|9|14	0.99	0
SARS-CoV2 E	Q9P2Q2	FRMD4A	0.0160332	0.69	0.33	0|0|1	0|0|1|0|0|0|0|0|0|0|1	1.83	0
SARS-CoV2 E	Q9UBS4	DNAJB11	0.20114	0.69	0.67	0|1|1	0|0|0|0|0|0|0|0|0|0|0	6.67	0
SARS-CoV2 E	Q9UBU8	MORF4L1	0.0505281	0.33	0.67	0|0|2	0|0|0|0|0|0|0|0|0|0|2	3.67	0.29
SARS-CoV2 E	Q9UBV8	PEF1	0.0101404	0.51	0.67	0|0|2	1|0|2|2|1|1|1|3|0|1|1	0.56	0.04
SARS-CoV2 E	Q9UFW8	CGGBP1	0.301512	0.45	4	1|3|8	6|6|4|2|4|5|1|1|3|3|0	1.26	0.09
SARS-CoV2 E	Q9UG56	PISD	0.0741903	0.23	0.67	0|0|2	1|0|0|0|0|0|0|0|0|0|0	6.67	0.32
SARS-CoV2 E	Q9UG63	ABCF2	0.278393	0.11	5	0|6|9	1|1|0|6|0|0|0|0|1|1|0	5.5	0.61
SARS-CoV2 E	Q9UHV9	PFDN2	0.235164	0.39	2.33	0|4|3	2|1|2|1|2|1|0|1|3|2|1	1.6	0.19
SARS-CoV2 E	Q9UHX1	PUF60	0.208464	0.69	3.33	0|4|6	7|8|9|9|8|4|3|3|6|5|4	0.56	0
SARS-CoV2 E	Q9UI30	TRMT112	0.0475227	0.69	0.33	0|0|1	0|0|1|2|0|0|0|0|0|0|0	1.22	0
SARS-CoV2 E	Q9UI43	MRM2	0.327808	0.69	2.33	1|3|3	5|2|11|5|3|2|1|4|6|8|3	0.51	0
SARS-CoV2 E	Q9UII2	ATP5IF1	0.221834	0.45	5.33	0|8|8	1|4|4|4|5|5|1|3|4|3|4	1.54	0.1
SARS-CoV2 E	Q9UJV9	DDX41	0.21708	0.56	3.33	0|4|6	3|5|2|3|3|4|3|3|5|2|3	1.02	0.01
SARS-CoV2 E	Q9UK53	ING1	0.382601	0.69	0.33	0|0|1	0|0|0|0|0|0|0|0|0|0|0	3.33	0
SARS-CoV2 E	Q9UKT4	FBXO5	0.278135	0.12	1.33	0|2|2	0|0|0|0|0|1|1|0|1|0|0	4.89	0.52
SARS-CoV2 E	Q9UKV3	ACIN1	0.290009	0.22	1.33	0|1|3	0|1|1|0|0|0|0|0|0|0|0	7.33	0.33
SARS-CoV2 E	Q9UKV5	AMFR	0.0191136	0.69	0.33	0|1|0	0|0|0|0|0|0|0|0|0|0|0	3.33	0
SARS-CoV2 E	Q9ULC4	MCTS1	0.227756	0.13	1.67	0|3|2	1|1|0|2|0|0|0|0|0|0|1	3.67	0.49
SARS-CoV2 E	Q9UMS4	PRPF19	0.0336343	0.35	1.67	0|0|5	1|2|1|3|1|0|0|0|4|0|2	1.31	0.25
SARS-CoV2 E	Q9UMY1	NOL7	0.0497884	0.69	0.33	0|0|1	0|1|1|0|1|0|0|0|0|0|0	1.22	0
SARS-CoV2 E	Q9UNQ2	DIMT1	0.241627	0.14	1.67	0|3|2	0|0|1|2|1|0|1|0|0|0|1	3.06	0.43
SARS-CoV2 E	Q9UNZ5	C19orf53	0.156003	0.49	1.67	0|4|1	0|2|2|3|2|1|2|3|2|1|2	0.92	0.06
SARS-CoV2 E	Q9UQ35	SRRM2	0.362714	0.52	7.67	3|11|9	6|5|6|6|4|5|5|3|6|4|3	1.59	0.03
SARS-CoV2 E	Q9UQ80	PA2G4	0.262521	0.1	7.67	0|11|12	1|0|0|10|0|0|0|0|0|1|0	7.03	0.64
SARS-CoV2 E	Q9Y224	RTRAF	0.0141961	0.41	0.67	0|0|2	1|1|1|0|0|0|0|0|2|1|1	1.05	0.15
SARS-CoV2 E	Q9Y237	PIN4	0.325027	0.69	2.33	1|3|3	6|3|6|6|4|2|3|2|5|5|2	0.58	0
SARS-CoV2 E	Q9Y241	HIGD1A	0.218486	0.69	0.67	1|0|1	0|0|0|0|1|0|0|1|0|0|0	3.67	0
SARS-CoV2 E	Q9Y262	EIF3L	0.119866	0.69	0.33	0|1|0	0|0|0|0|0|0|0|0|0|0|0	3.33	0
SARS-CoV2 E	Q9Y277	VDAC3	0.32349	0	3	4|3|2	0|0|0|0|0|0|0|0|0|0|0	30	0.98
SARS-CoV2 E	Q9Y285	FARSA	0.34116	0.38	1.67	1|2|2	1|0|1|3|1|1|0|0|1|1|0	2.04	0.2
SARS-CoV2 E	Q9Y295	DRG1	0.254052	0.11	4.33	0|5|8	1|2|0|2|1|2|0|0|0|5|1	3.4	0.56
SARS-CoV2 E	Q9Y2R4	DDX52	0.205011	0.52	2	0|2|4	2|3|1|1|4|2|1|1|2|2|4	0.96	0.03
SARS-CoV2 E	Q9Y2S6	TMA7	0.329621	0.61	5	2|5|8	9|5|5|3|4|5|4|4|5|2|5	1.08	0
SARS-CoV2 E	Q9Y2V2	CARHSP1	0.190422	0.69	1	0|2|1	1|3|4|1|5|1|2|1|2|2|2	0.46	0
SARS-CoV2 E	Q9Y2W1	THRAP3	0.322386	0.5	1.33	1|2|1	0|1|3|6|1|1|0|0|2|0|0	1.05	0.04
SARS-CoV2 E	Q9Y2W2	WBP11	0.0748644	0.23	0.67	0|0|2	0|0|0|0|0|0|0|0|0|0|0	6.67	0.32
SARS-CoV2 E	Q9Y2X3	NOP58	0.310021	0.16	5.67	1|8|8	3|4|3|7|3|2|1|2|3|2|1	2.01	0.38
SARS-CoV2 E	Q9Y314	NOSIP	0.314349	0.63	4.67	1|7|6	6|3|6|10|3|4|3|4|6|4|4	0.97	0
SARS-CoV2 E	Q9Y383	LUC7L2	0.329773	0.69	19	14|21|22	21|21|20|21|21|24|23|15|24|13|11	0.98	0
SARS-CoV2 E	Q9Y388	RBMX2	0.330815	0.62	2	1|2|3	4|3|3|3|3|3|2|3|4|2|2	0.69	0
SARS-CoV2 E	Q9Y3A5	SBDS	0.243072	0.13	5.67	0|9|8	3|3|1|9|1|3|0|0|1|3|2	2.4	0.47
SARS-CoV2 E	Q9Y3B4	SF3B6	0.321251	0.69	1	1|1|1	1|1|1|0|1|1|0|1|1|1|1	1.22	0
SARS-CoV2 E	Q9Y3C1	NOP16	0.218121	0.69	0.67	0|1|1	0|0|0|0|2|0|0|0|2|1|0	1.47	0
SARS-CoV2 E	Q9Y3C6	PPIL1	0.36446	0.43	1.67	1|2|2	0|1|1|2|1|1|1|1|1|1|1	1.67	0.12
SARS-CoV2 E	Q9Y3E2	BOLA1	0.0138411	0.69	0.33	0|1|0	4|2|2|1|2|1|0|1|1|2|1	0.22	0
SARS-CoV2 E	Q9Y3I0	RTCB	0.22465	0.4	2	0|3|3	1|0|3|3|2|0|0|0|3|1|1	1.57	0.17
SARS-CoV2 E	Q9Y3T9	NOC2L	0.264759	0.69	0.67	1|0|1	0|0|0|0|0|0|0|0|0|0|0	6.67	0
SARS-CoV2 E	Q9Y3Y2	CHTOP	0.0222149	0.69	0.33	0|1|0	0|2|1|1|0|0|0|0|1|0|0	0.73	0
SARS-CoV2 E	Q9Y421	FAM32A	0.314165	0.69	2.33	2|2|3	3|4|3|3|3|3|2|3|5|4|5	0.68	0
SARS-CoV2 E	Q9Y450	HBS1L	0.419007	0.69	0.67	0|1|1	0|0|0|1|0|0|0|0|0|0|0	6.67	0
SARS-CoV2 E	Q9Y4P3	TBL2	0.0118623	0.69	0.33	0|1|0	0|0|0|0|0|0|0|0|0|0|0	3.33	0
SARS-CoV2 E	Q9Y4X0	AMMECR1	0.19044	0.69	1	0|2|1	3|2|3|3|3|2|2|1|2|2|3	0.42	0
SARS-CoV2 E	Q9Y508	RNF114	0.0292283	0.69	0.33	0|1|0	0|1|0|2|1|0|0|0|0|0|0	0.92	0
SARS-CoV2 E	Q9Y5B9	SUPT16H	0.42145	0.4	4.67	2|7|5	0|11|4|13|0|0|0|0|1|0|0	1.77	0.16
SARS-CoV2 E	Q9Y5M8	SRPRB	0.369598	0	2.33	2|2|3	0|0|0|0|0|0|0|0|0|0|0	23.33	0.97
SARS-CoV2 E	Q9Y5S9	RBM8A	0.230538	0.4	1	0|1|2	0|0|1|2|1|1|0|0|1|0|0	1.83	0.17
SARS-CoV2 E	Q9Y5V0	ZNF706	0.34295	0.55	1.67	1|2|2	2|2|1|2|2|2|2|2|1|1|2	0.96	0.01
SARS-CoV2 E	Q9Y5Y2	NUBP2	0.213201	0.69	0.67	0|1|1	1|0|0|0|1|0|0|1|1|0|2	1.22	0
SARS-CoV2 E	Q9Y606	PUS1	0.241899	0.51	2.33	0|3|4	3|2|4|2|4|1|0|2|1|1|3	1.12	0.03
SARS-CoV2 E	Q9Y6A4	CFAP20	0.444392	0.69	0.67	0|1|1	0|0|0|1|1|0|0|0|0|0|0	3.67	0
SARS-CoV2 E	Q9Y6V7	DDX49	0.214146	0.4	1.33	0|2|2	0|1|1|0|3|2|1|0|0|1|1	1.47	0.16
SARS-CoV2 M	A0A0U1RRE5	NBDY	0.211642	0.53	1.33	2|0|2	3|0|2|3|2|0|0|3|1|2|1	0.86	0.02
SARS-CoV2 M	A0FGR8	ESYT2	0.332481	0	10	9|11|10	0|0|0|0|0|0|0|0|0|0|0	100	1
SARS-CoV2 M	A0PK00	TMEM120B	0.314639	0.69	0.67	0|1|1	0|0|0|0|0|0|0|0|0|0|0	6.67	0
SARS-CoV2 M	A1L0T0	ILVBL	0.471597	0	2.33	2|2|3	0|0|0|0|0|0|0|0|0|0|0	23.33	0.97
SARS-CoV2 M	A6NDG6	PGP	0.313055	0.69	3	2|4|3	2|3|6|4|5|4|4|5|6|3|3	0.73	0
SARS-CoV2 M	A6NHL2	TUBAL3	0.105832	0.69	0.33	1|0|0	0|0|0|0|0|0|0|0|0|0|0	3.33	0
SARS-CoV2 M	A6NHQ2	FBLL1	0.041382	0.69	0.33	0|1|0	0|0|0|0|0|0|0|0|1|0|0	3.33	0
SARS-CoV2 M	E9PRG8	C11orf98	0.318564	0.44	1.33	1|2|1	1|1|0|1|2|1|1|0|0|0|2	1.63	0.1
SARS-CoV2 M	O00116	AGPS	0.0154347	0.69	0.33	1|0|0	0|0|0|0|0|0|0|0|0|0|0	3.33	0
SARS-CoV2 M	O00139	KIF2A	0.0134766	0.69	0.33	0|0|1	0|0|0|0|0|0|0|1|1|0|0	1.83	0
SARS-CoV2 M	O00165	HAX1	0.520098	0	16.67	17|13|20	0|0|0|0|0|0|0|0|0|0|0	166.67	1
SARS-CoV2 M	O00170	AIP	0.198286	0.69	0.67	1|0|1	6|4|6|5|2|1|3|4|5|4|4	0.17	0
SARS-CoV2 M	O00217	NDUFS8	0.189203	0.69	0.33	1|0|0	0|0|0|0|0|0|0|0|0|0|0	3.33	0
SARS-CoV2 M	O00244	ATOX1	0.324615	0.62	3.67	4|3|4	4|3|4|8|3|4|4|5|3|1|0	1.03	0
SARS-CoV2 M	O00264	PGRMC1	0.413248	0	7.33	10|6|6	0|0|0|0|0|0|0|0|0|0|0	73.33	1
SARS-CoV2 M	O00311	CDC7	0.395739	0.69	1	1|1|1	0|0|0|0|0|0|0|0|0|0|0	10	0
SARS-CoV2 M	O00400	SLC33A1	0.491672	0.69	0.67	1|0|1	0|0|0|0|0|0|0|0|0|0|0	6.67	0
SARS-CoV2 M	O00410	IPO5	0.496568	0	15	15|13|17	0|0|0|0|0|0|0|0|0|0|0	150	1
SARS-CoV2 M	O00458	IFRD1	0.0295595	0.69	0.33	0|0|1	0|0|0|1|0|0|0|0|0|0|0	3.33	0
SARS-CoV2 M	O00479	HMGN4	0.319524	0.44	3	2|3|4	1|2|1|2|2|2|3|1|0|2|3	1.74	0.1
SARS-CoV2 M	O00483	NDUFA4	0.349233	0.01	2.67	2|3|3	0|0|1|0|0|0|0|1|1|0|1	7.33	0.83
SARS-CoV2 M	O00487	PSMD14	0.0669748	0.69	0.33	1|0|0	0|0|0|0|0|0|0|0|0|0|0	3.33	0
SARS-CoV2 M	O00541	PES1	0.00758421	0.69	0.67	0|2|0	1|2|1|6|5|4|0|0|2|1|2	0.31	0
SARS-CoV2 M	O00567	NOP56	0.0030874	0.69	0.33	0|1|0	0|3|1|1|0|0|0|1|2|0|0	0.46	0
SARS-CoV2 M	O00571	DDX3X	0.319078	0.69	2.67	3|2|3	5|4|1|1|3|2|2|5|4|3|3	0.89	0
SARS-CoV2 M	O00743	PPP6C	0.441783	0.04	2.33	1|3|3	0|0|0|0|0|0|0|0|0|0|0	23.33	0.66
SARS-CoV2 M	O00767	SCD	0.0662385	0.69	0.33	1|0|0	0|0|0|0|0|0|0|0|0|0|0	3.33	0
SARS-CoV2 M	O14524	NEMP1	0.373572	0.69	0.33	0|0|1	0|0|0|0|0|0|0|0|0|0|0	3.33	0
SARS-CoV2 M	O14545	TRAFD1	0.408159	0.05	2	3|1|2	0|0|0|0|0|0|0|1|0|0|0	20	0.65
SARS-CoV2 M	O14556	GAPDHS	0.00778454	0.69	0.33	1|0|0	0|1|1|2|1|1|1|0|0|1|1	0.41	0
SARS-CoV2 M	O14561	NDUFAB1	0.0357706	0.69	0.33	1|0|0	0|0|0|0|0|0|0|0|0|0|0	3.33	0
SARS-CoV2 M	O14579	COPE	0.308748	0.23	1	2|1|0	0|0|0|0|0|0|0|0|0|0|0	10	0.32
SARS-CoV2 M	O14654	IRS4	0.336215	0	5	7|5|3	0|0|0|1|0|0|0|0|0|0|0	50	1
SARS-CoV2 M	O14681	EI24	0.477214	0	2.33	2|3|2	0|0|0|0|0|0|0|0|0|0|0	23.33	0.97
SARS-CoV2 M	O14730	RIOK3	0.659146	0.23	1	2|1|0	0|0|0|0|0|0|0|0|0|0|0	10	0.32
SARS-CoV2 M	O14732	IMPA2	0.324066	0.69	0.33	1|0|0	0|0|0|0|0|0|0|0|0|0|0	3.33	0
SARS-CoV2 M	O14734	ACOT8	0.361468	0.69	1	1|1|1	0|0|0|0|0|0|0|0|0|0|0	10	0
SARS-CoV2 M	O14735	CDIPT	0.477328	0	5	4|5|6	0|0|0|0|0|0|0|0|0|0|0	50	1
SARS-CoV2 M	O14757	CHEK1	0.333242	0.69	2	2|2|2	2|2|2|4|3|1|1|4|5|2|2	0.79	0
SARS-CoV2 M	O14773	TPP1	0.357361	0.69	0.67	1|1|0	0|0|0|0|0|0|0|0|0|0|0	6.67	0
SARS-CoV2 M	O14787	TNPO2	0.502685	0.69	0.67	1|0|1	0|0|0|0|0|0|0|0|0|0|0	6.67	0
SARS-CoV2 M	O14828	SCAMP3	0.538374	0.69	1	1|1|1	0|0|0|0|0|0|0|0|0|0|0	10	0
SARS-CoV2 M	O14880	MGST3	0.393448	0	4.67	8|4|2	0|0|0|0|0|0|0|0|0|0|0	46.67	0.99
SARS-CoV2 M	O14929	HAT1	0.296532	0.32	1	2|1|0	0|1|0|0|0|0|0|0|0|1|0	5.5	0.3
SARS-CoV2 M	O14965	AURKA	0.204565	0.69	0.67	1|1|0	0|1|1|2|2|0|3|1|1|0|0	0.67	0
SARS-CoV2 M	O14980	XPO1	0.552725	0	23.67	27|20|24	0|0|0|0|0|0|0|0|0|0|0	236.67	1
SARS-CoV2 M	O14981	BTAF1	0.68551	0.69	0.33	1|0|0	0|0|0|0|0|0|0|0|0|0|0	3.33	0
SARS-CoV2 M	O15042	U2SURP	0.31218	0.69	12.33	11|16|10	25|31|14|16|16|24|23|14|25|17|21	0.6	0
SARS-CoV2 M	O15127	SCAMP2	0.65381	0.01	2	2|2|2	0|0|0|0|0|0|0|0|0|0|0	20	0.96
SARS-CoV2 M	O15145	ARPC3	0.00806483	0.69	0.33	1|0|0	2|1|0|1|0|1|0|1|1|0|1	0.46	0
SARS-CoV2 M	O15162	PLSCR1	0.632119	0.69	1	1|1|1	0|0|0|0|0|0|0|0|0|0|0	10	0
SARS-CoV2 M	O15173	PGRMC2	0.537591	0	2.33	2|3|2	0|0|0|0|0|0|0|0|0|0|0	23.33	0.97
SARS-CoV2 M	O15235	MRPS12	0.314575	0.63	3.33	4|2|4	6|2|6|6|4|3|1|6|3|1|2	0.92	0
SARS-CoV2 M	O15243	LEPROT	0.567897	0.69	0.67	1|1|0	0|0|0|0|0|0|0|0|0|0|0	6.67	0
SARS-CoV2 M	O15258	RER1	0.489002	0	3	3|3|3	0|0|0|0|0|0|0|0|0|0|0	30	0.99
SARS-CoV2 M	O15260	SURF4	0.532503	0	6	5|8|5	0|0|0|0|0|0|0|0|0|0|0	60	1
SARS-CoV2 M	O15269	SPTLC1	0.3885	0	9.67	13|7|9	0|0|0|0|0|0|0|0|0|0|0	96.67	1
SARS-CoV2 M	O15270	SPTLC2	0.348099	0.23	1	0|2|1	0|0|0|0|0|0|0|0|0|0|0	10	0.32
SARS-CoV2 M	O15321	TM9SF1	0.55255	0	3.67	4|3|4	0|0|0|0|0|0|0|0|0|0|0	36.67	1
SARS-CoV2 M	O15347	HMGB3	0.252858	0.69	2	1|1|4	2|6|3|14|9|4|1|0|3|8|5	0.4	0
SARS-CoV2 M	O15371	EIF3D	0.247785	0.69	0.67	1|0|1	0|0|0|1|0|0|0|0|1|0|0	3.67	0
SARS-CoV2 M	O15372	EIF3H	0.358068	0.69	1	1|1|1	0|0|0|1|0|0|0|0|0|0|0	10	0
SARS-CoV2 M	O15397	IPO8	0.582052	0	3	2|3|4	0|0|0|0|0|0|0|0|0|0|0	30	0.98
SARS-CoV2 M	O15431	SLC31A1	0.685511	0.69	0.33	1|0|0	0|0|0|0|0|0|0|0|0|0|0	3.33	0
SARS-CoV2 M	O15439	ABCC4	0.0585272	0.69	0.33	1|0|0	0|0|0|0|0|0|0|0|0|0|0	3.33	0
SARS-CoV2 M	O43175	PHGDH	0.360704	0	19	18|21|18	1|2|5|2|0|1|1|1|2|1|0	13.06	1
SARS-CoV2 M	O43242	PSMD3	0.368615	0	4.67	3|6|5	0|0|0|1|0|0|0|0|0|0|0	46.67	1
SARS-CoV2 M	O43264	ZW10	0.0919067	0	4.67	5|3|6	0|0|0|0|0|0|0|0|0|0|0	46.67	1
SARS-CoV2 M	O43290	SART1	0.222613	0.69	0.67	1|1|0	0|0|0|1|1|0|0|1|1|0|0	1.83	0
SARS-CoV2 M	O43324	EEF1E1	0.101913	0.69	0.33	1|0|0	0|0|0|0|0|0|0|0|0|0|0	3.33	0
SARS-CoV2 M	O43396	TXNL1	0.198401	0.55	1	0|1|2	3|1|3|3|0|0|0|1|3|2|1	0.65	0.01
SARS-CoV2 M	O43505	B4GAT1	0.509951	0.01	2	2|2|2	0|0|0|0|0|0|0|0|0|0|0	20	0.96
SARS-CoV2 M	O43592	XPOT	0.507227	0	20.67	25|19|18	0|0|0|0|0|0|0|0|0|0|0	206.67	1
SARS-CoV2 M	O43615	TIMM44	0.454401	0	10.33	12|10|9	0|0|0|0|0|0|0|0|0|0|0	103.33	1
SARS-CoV2 M	O43670	ZNF207	0.0151291	0.42	0.67	0|2|0	0|1|1|2|3|1|0|0|0|0|0	0.92	0.13
SARS-CoV2 M	O43678	NDUFA2	0.112961	0.69	0.33	1|0|0	1|0|0|0|0|0|0|0|0|0|0	3.33	0
SARS-CoV2 M	O43684	BUB3	0.289205	0.62	3	2|5|2	5|4|3|6|5|2|2|2|5|5|3	0.79	0
SARS-CoV2 M	O43734	TRAF3IP2	0.0311253	0.69	0.33	0|0|1	0|0|0|0|0|0|0|0|3|0|0	1.22	0
SARS-CoV2 M	O43759	SYNGR1	0.483336	0.23	1.33	1|2|1	0|0|0|0|0|0|0|0|0|0|0	13.33	0.32
SARS-CoV2 M	O43761	SYNGR3	0.4568	0.23	1	1|0|2	0|0|0|0|0|0|0|0|0|0|0	10	0.32
SARS-CoV2 M	O43809	NUDT21	0.302398	0.57	1.33	1|2|1	1|2|2|4|2|2|1|1|0|2|2	0.77	0.01
SARS-CoV2 M	O43819	SCO2	0.338797	0.03	3	3|1|5	0|0|0|0|0|0|0|0|0|0|0	30	0.66
SARS-CoV2 M	O43823	AKAP8	0.511599	0	2.33	3|2|2	0|0|0|0|0|0|0|0|0|0|0	23.33	0.97
SARS-CoV2 M	O43826	SLC37A4	0.68551	0.69	0.33	1|0|0	0|0|0|0|0|0|0|0|0|0|0	3.33	0
SARS-CoV2 M	O43837	IDH3B	0.313461	0.69	1.67	1|2|2	2|3|4|3|2|1|1|1|2|4|3	0.71	0
SARS-CoV2 M	O43852	CALU	0.541363	0	12	12|12|12	0|0|0|1|1|0|0|0|1|0|0	44	1
SARS-CoV2 M	O60313	OPA1	0.208331	0.23	0.67	2|0|0	0|0|0|0|0|0|0|0|0|0|0	6.67	0.32
SARS-CoV2 M	O60547	GMDS	0.0162318	0.69	0.33	1|0|0	0|0|2|0|0|0|0|1|2|1|1	0.52	0
SARS-CoV2 M	O60716	CTNND1	0.321942	0.69	1	1|1|1	0|3|3|0|1|0|0|1|1|3|1	0.85	0
SARS-CoV2 M	O60762	DPM1	0.366866	0	8	13|4|7	0|0|0|0|0|0|0|0|0|0|0	80	1
SARS-CoV2 M	O60779	SLC19A2	0.744933	0.23	1.33	1|2|1	0|0|0|0|0|0|0|0|0|0|0	13.33	0.32
SARS-CoV2 M	O60830	TIMM17B	0.103712	0.69	0.33	0|1|0	0|0|0|0|0|0|0|0|0|0|0	3.33	0
SARS-CoV2 M	O60831	PRAF2	0.325165	0.69	0.67	1|1|0	0|0|0|0|0|0|0|0|0|0|0	6.67	0
SARS-CoV2 M	O60832	DKC1	0.323888	0.69	1	1|1|1	1|2|1|1|1|1|0|0|2|0|1	1.1	0
SARS-CoV2 M	O60841	EIF5B	0.201368	0.69	2	0|3|3	8|9|10|13|14|6|2|3|6|5|5	0.27	0
SARS-CoV2 M	O60869	EDF1	0.297778	0.69	1.33	1|2|1	3|4|2|5|2|2|1|1|2|2|3	0.54	0
SARS-CoV2 M	O60884	DNAJA2	0.35333	0	8.33	9|9|7	0|0|0|0|0|0|0|0|0|0|0	83.33	1
SARS-CoV2 M	O60942	RNGTT	0.0297205	0.23	0.67	0|2|0	0|0|0|0|0|0|0|0|0|0|0	6.67	0.32
SARS-CoV2 M	O75027	ABCB7	0.598033	0.05	2.33	2|4|1	0|0|0|0|0|0|0|0|0|0|0	23.33	0.65
SARS-CoV2 M	O75155	CAND2	0.261116	0.23	1	2|0|1	0|0|0|0|0|0|0|0|0|0|0	10	0.32
SARS-CoV2 M	O75190	DNAJB6	0.567827	0	6.67	8|5|7	0|0|0|0|0|0|0|1|0|0|0	66.67	1
SARS-CoV2 M	O75251	NDUFS7	0.342239	0.69	0.33	0|1|0	0|0|0|0|0|0|0|0|0|0|0	3.33	0
SARS-CoV2 M	O75298	RTN2	0.127321	0.69	0.33	1|0|0	1|0|0|0|0|0|0|0|0|0|0	3.33	0
SARS-CoV2 M	O75306	NDUFS2	0.455361	0	6	7|6|5	0|0|0|0|0|0|0|0|0|0|0	60	1
SARS-CoV2 M	O75340	PDCD6	0.321346	0.64	3.67	3|3|5	3|4|8|7|4|4|4|3|5|4|3	0.82	0
SARS-CoV2 M	O75352	MPDU1	0.518617	0.69	1	1|1|1	0|0|0|0|0|0|0|0|0|0|0	10	0
SARS-CoV2 M	O75390	CS	0.0909951	0.69	0.33	0|0|1	0|0|0|0|0|0|0|0|0|1|1	1.83	0
SARS-CoV2 M	O75396	SEC22B	0.334548	0.19	1.67	3|1|1	0|0|0|0|0|0|0|0|0|0|0	16.67	0.33
SARS-CoV2 M	O75400	PRPF40A	0.19798	0.69	1.67	0|3|2	3|3|3|5|3|5|2|2|4|3|5	0.48	0
SARS-CoV2 M	O75419	CDC45	0.418953	0	3.33	3|4|3	0|0|0|0|0|0|0|0|0|0|0	33.33	1
SARS-CoV2 M	O75431	MTX2	0.0283403	0.69	0.33	0|0|1	0|0|0|0|0|0|0|0|0|0|0	3.33	0
SARS-CoV2 M	O75439	PMPCB	0.98512	0	9.67	11|6|12	0|0|0|0|0|0|0|0|0|0|0	96.67	1
SARS-CoV2 M	O75475	PSIP1	0.00809898	0.69	0.33	0|0|1	1|1|2|4|1|0|0|2|0|1|1	0.28	0
SARS-CoV2 M	O75489	NDUFS3	0.405066	0	5.67	7|5|5	0|0|0|0|0|0|0|0|0|0|0	56.67	1
SARS-CoV2 M	O75600	GCAT	0.349212	0.69	1	1|1|1	0|0|0|0|0|0|0|0|0|0|1	10	0
SARS-CoV2 M	O75616	ERAL1	0.571303	0.03	2.67	4|1|3	0|0|0|0|0|0|0|0|0|0|0	26.67	0.66
SARS-CoV2 M	O75694	NUP155	0.363496	0.01	7.67	9|7|7	5|1|2|1|2|2|1|1|4|5|2	3.24	0.8
SARS-CoV2 M	O75746	SLC25A12	0.422204	0.18	2.33	1|5|1	0|0|0|0|0|0|0|0|0|0|0	23.33	0.33
SARS-CoV2 M	O75787	ATP6AP2	0.980944	0.08	1.67	2|2|1	0|0|0|0|0|0|0|0|0|0|0	16.67	0.64
SARS-CoV2 M	O75821	EIF3G	0.30749	0.11	1.33	2|2|0	0|0|0|0|2|0|0|0|0|0|0	7.33	0.59
SARS-CoV2 M	O75880	SCO1	0.245802	0.08	1.33	2|0|2	0|0|0|0|0|0|0|0|0|0|0	13.33	0.64
SARS-CoV2 M	O75891	ALDH1L1	0.0919449	0.69	0.33	0|0|1	0|0|0|0|0|0|0|0|0|0|0	3.33	0
SARS-CoV2 M	O75915	ARL6IP5	0.638143	0.03	3	4|1|4	0|0|0|0|0|0|0|0|0|0|0	30	0.67
SARS-CoV2 M	O75937	DNAJC8	0.294059	0.69	1.33	1|2|1	3|2|1|9|5|3|1|1|2|4|3	0.43	0
SARS-CoV2 M	O75940	SMNDC1	0.330884	0.58	4.33	5|4|4	3|4|3|4|5|5|1|2|3|2|3	1.36	0
SARS-CoV2 M	O75947	ATP5PD	0.416346	0	4.33	4|4|5	0|0|0|0|0|0|0|0|0|0|0	43.33	1
SARS-CoV2 M	O75964	ATP5MG	0.366818	0.23	1.33	1|1|2	0|0|0|0|0|0|0|0|0|0|0	13.33	0.32
SARS-CoV2 M	O76031	CLPX	0.0159979	0.69	0.33	0|1|0	0|1|0|1|1|0|0|0|0|1|0	0.92	0
SARS-CoV2 M	O76071	CIAO1	0.366376	0.23	1	0|1|2	0|0|0|0|0|0|0|0|0|0|0	10	0.32
SARS-CoV2 M	O94766	B3GAT3	0.0246984	0.69	0.33	1|0|0	0|0|0|0|0|0|0|0|0|0|0	3.33	0
SARS-CoV2 M	O94822	LTN1	0.53731	0	5.33	3|5|8	0|0|0|0|0|0|0|0|0|0|0	53.33	1
SARS-CoV2 M	O94829	IPO13	0.586882	0.19	1.67	1|1|3	0|0|0|0|0|0|0|0|0|0|0	16.67	0.33
SARS-CoV2 M	O94874	UFL1	0.980771	0.23	1.33	2|1|1	0|0|0|0|0|0|0|0|0|0|0	13.33	0.32
SARS-CoV2 M	O94903	PLPBP	0.323887	0.69	3.33	3|3|4	7|6|4|4|3|3|4|4|4|5|6	0.73	0
SARS-CoV2 M	O95070	YIF1A	0.856001	0	2.33	2|2|3	0|0|0|0|0|0|0|0|0|0|0	23.33	0.97
SARS-CoV2 M	O95168	NDUFB4	0.0589229	0.69	0.33	0|0|1	0|0|0|0|0|0|0|0|0|0|0	3.33	0
SARS-CoV2 M	O95197	RTN3	0.651711	0	7	7|8|6	0|0|0|0|0|0|0|0|0|0|0	70	1
SARS-CoV2 M	O95232	LUC7L3	0.323257	0.69	16	16|17|15	18|19|18|21|25|18|17|18|21|8|14	0.89	0
SARS-CoV2 M	O95258	SLC25A14	0.306871	0.69	0.33	1|0|0	0|0|0|0|0|0|0|0|0|0|0	3.33	0
SARS-CoV2 M	O95299	NDUFA10	0.531498	0.05	2.33	4|2|1	0|0|0|0|0|0|0|0|0|0|0	23.33	0.65
SARS-CoV2 M	O95336	PGLS	0.330783	0.69	1	1|1|1	1|0|0|0|1|1|0|1|2|2|7	0.73	0
SARS-CoV2 M	O95347	SMC2	0.39782	0.69	0.67	0|1|1	0|0|0|0|0|0|0|0|0|0|0	6.67	0
SARS-CoV2 M	O95372	LYPLA2	0.199103	0.44	1	2|0|1	2|2|3|2|0|0|0|0|0|0|0	1.22	0.11
SARS-CoV2 M	O95373	IPO7	0.503576	0	6	7|6|5	0|0|0|0|0|0|0|0|0|0|0	60	1
SARS-CoV2 M	O95394	PGM3	0.560184	0	3.33	2|3|5	0|0|0|0|0|0|0|0|0|0|0	33.33	0.99
SARS-CoV2 M	O95427	PIGN	0.0782812	0.69	0.33	0|0|1	0|0|0|0|0|0|0|0|0|0|0	3.33	0
SARS-CoV2 M	O95433	AHSA1	0.425252	0.08	1.67	2|1|2	0|0|0|0|0|0|0|0|0|0|0	16.67	0.64
SARS-CoV2 M	O95456	PSMG1	0.0331801	0.69	0.33	1|0|0	0|0|0|0|0|0|0|0|0|0|1	3.33	0
SARS-CoV2 M	O95573	ACSL3	0.0310738	0.69	0.33	1|0|0	0|0|0|0|0|0|0|0|0|0|0	3.33	0
SARS-CoV2 M	O95674	CDS2	0.529236	0	4.33	6|4|3	0|0|0|0|0|0|0|0|0|0|0	43.33	1
SARS-CoV2 M	O95816	BAG2	0.0101729	0.69	0.33	0|1|0	0|0|0|0|0|0|0|0|0|0|0	3.33	0
SARS-CoV2 M	O95831	AIFM1	0.359857	0.02	5.33	8|5|3	0|0|6|4|1|0|0|0|0|0|0	5.33	0.75
SARS-CoV2 M	O95864	FADS2	0.587168	0.05	2	3|1|2	0|0|0|0|0|0|0|0|0|0|0	20	0.65
SARS-CoV2 M	O95881	TXNDC12	0.315833	0.69	2.67	2|3|3	5|5|7|5|5|4|2|6|4|4|3	0.59	0
SARS-CoV2 M	O96000	NDUFB10	0.435471	0	2.67	3|2|3	0|0|0|0|0|0|0|0|0|0|0	26.67	0.98
SARS-CoV2 M	O96005	CLPTM1	0.457088	0.08	1.33	0|2|2	0|0|0|0|0|0|0|0|0|0|0	13.33	0.64
SARS-CoV2 M	P00338	LDHA	0.390647	0.01	3	3|2|4	0|1|2|1|0|0|0|0|0|0|0	8.25	0.86
SARS-CoV2 M	P00367	GLUD1	0.553288	0	3	3|3|3	0|0|0|0|0|0|0|0|0|0|0	30	0.99
SARS-CoV2 M	P00395	MT-CO1	0.68551	0.69	0.33	1|0|0	0|0|0|0|0|0|0|0|0|0|0	3.33	0
SARS-CoV2 M	P00403	MT-CO2	0.406893	0	4	5|3|4	0|0|0|0|0|0|0|0|0|0|0	40	1
SARS-CoV2 M	P00414	MT-CO3	0.122156	0.69	0.33	0|0|1	0|0|0|0|0|0|0|0|0|0|0	3.33	0
SARS-CoV2 M	P00441	SOD1	0.0131232	0.69	0.33	0|0|1	3|1|1|0|0|0|0|0|1|1|0	0.52	0
SARS-CoV2 M	P00492	HPRT1	0.316521	0.46	3.67	4|5|2	2|3|3|2|1|2|1|2|4|2|2	1.68	0.08
SARS-CoV2 M	P00558	PGK1	0.00563023	0.69	0.33	0|1|0	1|2|1|2|3|0|0|0|1|1|2	0.28	0
SARS-CoV2 M	P00846	MT-ATP6	0.401585	0.69	1	1|1|1	0|0|0|0|0|0|0|0|0|0|0	10	0
SARS-CoV2 M	P01889	HLA-B	0.389062	0.19	1.67	1|1|3	0|0|0|0|0|0|0|0|0|0|0	16.67	0.33
SARS-CoV2 M	P02545	LMNA	0.0389316	0.69	0.33	0|0|1	0|0|1|1|0|0|0|0|1|0|0	1.22	0
SARS-CoV2 M	P02786	TFRC	0.478847	0	4	4|4|4	0|0|0|0|0|0|0|0|0|0|0	40	1
SARS-CoV2 M	P03886	MT-ND1	0.478072	0.69	1	1|1|1	0|0|0|0|0|0|0|0|0|0|0	10	0
SARS-CoV2 M	P03897	MT-ND3	0.615942	0.69	1	1|1|1	0|0|0|0|0|0|0|0|0|0|0	10	0
SARS-CoV2 M	P03915	MT-ND5	0.137568	0.69	0.33	0|1|0	0|0|0|0|0|0|0|0|0|0|0	3.33	0
SARS-CoV2 M	P03923	MT-ND6	0.879778	0.69	0.67	1|1|0	0|0|0|0|0|0|0|0|0|0|0	6.67	0
SARS-CoV2 M	P04049	RAF1	0.518794	0.69	0.67	1|1|0	0|0|0|0|0|0|0|0|0|0|0	6.67	0
SARS-CoV2 M	P04075	ALDOA	0.00985061	0.69	0.33	0|0|1	1|1|1|1|2|0|0|1|2|0|1	0.37	0
SARS-CoV2 M	P04080	CSTB	0.315291	0.65	4.67	4|6|4	5|7|6|4|5|5|5|6|8|3|5	0.87	0
SARS-CoV2 M	P04181	OAT	0.35149	0.69	0.67	1|1|0	0|0|0|0|0|0|0|0|0|0|0	6.67	0
SARS-CoV2 M	P04183	TK1	0.0413048	0.69	0.33	0|0|1	0|0|1|0|0|0|0|0|0|0|0	3.33	0
SARS-CoV2 M	P04350	TUBB4A	0.464583	0	2.67	3|2|3	0|0|0|0|0|0|0|0|0|0|0	26.67	0.98
SARS-CoV2 M	P04406	GAPDH	0.298866	0.6	4.67	2|5|7	7|6|3|4|2|3|3|4|7|2|4	1.14	0
SARS-CoV2 M	P04439	HLA-A	0.0110893	0.69	0.33	1|0|0	0|0|0|0|0|0|0|0|0|0|0	3.33	0
SARS-CoV2 M	P04792	HSPB1	0.473053	0	5.33	7|3|6	0|0|0|1|1|0|0|1|0|0|0	19.56	0.98
SARS-CoV2 M	P04843	RPN1	0.413843	0	32	36|28|32	0|0|0|0|0|0|0|0|0|0|0	320	1
SARS-CoV2 M	P04844	RPN2	0.390025	0	11.67	13|9|13	0|0|0|0|0|0|0|0|0|0|0	116.67	1
SARS-CoV2 M	P05023	ATP1A1	0.426322	0	42.33	47|39|41	0|0|0|0|0|0|0|0|1|0|0	423.33	1
SARS-CoV2 M	P05026	ATP1B1	0.817626	0	3.67	3|4|4	0|0|0|0|0|0|0|0|0|0|0	36.67	1
SARS-CoV2 M	P05114	HMGN1	0.259797	0.58	2.67	1|5|2	1|4|4|6|6|0|1|2|3|2|4	0.89	0
SARS-CoV2 M	P05141	SLC25A5	0.334328	0	11.67	11|11|13	3|4|4|5|3|2|4|3|5|0|0	3.89	0.98
SARS-CoV2 M	P05165	PCCA	0.30622	0.69	9	10|5|12	24|29|17|10|11|21|24|7|29|21|21	0.46	0
SARS-CoV2 M	P05166	PCCB	0.302542	0.69	3	2|3|4	18|20|6|5|6|19|18|4|27|16|13	0.22	0
SARS-CoV2 M	P05204	HMGN2	0.320141	0.63	8.33	6|8|11	4|3|7|8|6|5|6|7|9|9|5	1.33	0
SARS-CoV2 M	P05386	RPLP1	0.31519	0.43	1.33	1|1|2	1|2|1|1|0|0|0|0|4|0|0	1.63	0.11
SARS-CoV2 M	P05387	RPLP2	0.202236	0.69	1.33	2|2|0	2|8|5|6|0|1|0|0|6|1|2	0.47	0
SARS-CoV2 M	P05388	RPLP0	0.211876	0.69	0.67	1|1|0	0|2|1|2|0|0|0|0|1|0|0	1.22	0
SARS-CoV2 M	P06280	GLA	0.316252	0.08	1.67	2|1|2	0|0|0|0|0|0|0|0|0|0|0	16.67	0.64
SARS-CoV2 M	P06493	CDK1	0.400354	0	5.67	6|7|4	0|0|0|0|0|0|0|0|2|1|2	12.47	0.97
SARS-CoV2 M	P06576	ATP5F1B	0.379322	0	29.33	29|29|30	4|4|8|5|4|2|2|2|2|2|3	8.49	1
SARS-CoV2 M	P06730	EIF4E	0.0133562	0.69	0.33	1|0|0	1|0|0|1|0|0|1|1|1|0|0	0.73	0
SARS-CoV2 M	P06733	ENO1	0.326685	0.66	6.33	7|5|7	12|7|7|8|7|4|6|4|6|4|5	1	0
SARS-CoV2 M	P06748	NPM1	0.157527	0.69	1.33	1|3|0	4|15|14|15|2|0|0|1|10|3|2	0.22	0
SARS-CoV2 M	P07195	LDHB	0.338045	0.14	2	2|2|2	1|1|1|1|1|0|0|0|2|0|0	3.14	0.44
SARS-CoV2 M	P07305	H1-0	0.335017	0.69	1	1|1|1	1|2|3|1|1|0|0|0|1|0|0	1.22	0
SARS-CoV2 M	P07355	ANXA2	0.00597517	0.69	0.33	0|0|1	2|2|2|2|0|2|1|1|2|2|1	0.22	0
SARS-CoV2 M	P07384	CAPN1	0.463123	0	3	3|3|3	0|0|0|0|0|0|0|0|0|0|0	30	0.99
SARS-CoV2 M	P07437	TUBB	0.335747	0.11	11	12|10|11	5|4|7|3|6|2|2|5|4|2|3	2.81	0.61
SARS-CoV2 M	P07686	HEXB	0.21974	0.69	0.33	1|0|0	0|0|0|0|0|0|0|0|0|0|0	3.33	0
SARS-CoV2 M	P07814	EPRS1	0.208071	0.69	0.67	1|0|1	0|0|1|1|2|1|1|1|0|0|2	0.81	0
SARS-CoV2 M	P07858	CTSB	0.385425	0.69	0.67	0|1|1	0|0|0|0|0|0|0|0|1|0|0	6.67	0
SARS-CoV2 M	P07900	HSP90AA1	0.524542	0	6	6|6|6	0|0|0|1|0|0|0|1|0|0|0	33	1
SARS-CoV2 M	P07910	HNRNPC	0.00433677	0.69	0.33	0|1|0	0|7|7|3|0|0|1|0|6|0|0	0.15	0
SARS-CoV2 M	P08195	SLC3A2	0.404433	0	10.67	12|9|11	0|0|0|0|0|0|0|0|0|0|0	106.67	1
SARS-CoV2 M	P08237	PFKM	0.27366	0	5.33	5|7|4	0|0|0|0|0|0|0|0|0|0|0	53.33	1
SARS-CoV2 M	P08238	HSP90AB1	0.414409	0	8.33	9|8|8	1|1|0|2|1|1|1|0|1|0|0	11.46	1
SARS-CoV2 M	P08559	PDHA1	0.29733	0.05	1.67	0|2|3	0|0|0|0|0|0|0|0|0|0|0	16.67	0.65
SARS-CoV2 M	P08574	CYC1	0.355427	0.69	1	1|1|1	0|0|0|0|0|0|0|0|0|0|0	10	0
SARS-CoV2 M	P08579	SNRPB2	0.00762207	0.69	0.33	0|1|0	0|1|1|1|1|0|1|1|1|0|0	0.52	0
SARS-CoV2 M	P08670	VIM	0.00121096	0.69	0.33	0|1|0	1|12|12|16|0|0|1|0|8|0|0	0.07	0
SARS-CoV2 M	P08708	RPS17	0.318213	0.68	11	8|12|13	15|13|13|16|12|9|7|12|14|8|6	0.97	0
SARS-CoV2 M	P08865	RPSA	0.325665	0.65	5.67	7|5|5	7|3|6|10|3|4|4|7|6|6|4	1.04	0
SARS-CoV2 M	P09429	HMGB1	0.316805	0.69	7	8|5|8	12|10|7|18|12|5|7|4|11|7|7	0.77	0
SARS-CoV2 M	P09543	CNP	0.349068	0.01	2	2|2|2	0|0|0|1|0|0|0|0|0|0|0	20	0.96
SARS-CoV2 M	P09622	DLD	0.0260094	0.69	0.33	0|0|1	1|0|0|0|0|0|0|0|0|0|0	3.33	0
SARS-CoV2 M	P09651	HNRNPA1	0.273877	0.61	1.67	1|3|1	3|7|7|7|0|1|0|1|6|0|0	0.57	0
SARS-CoV2 M	P09874	PARP1	0.313388	0.69	20.67	17|19|26	31|42|33|61|47|31|14|30|32|34|29	0.59	0
SARS-CoV2 M	P10155	RO60	0.451063	0.03	2.67	4|3|1	0|0|0|0|0|0|0|0|0|0|0	26.67	0.66
SARS-CoV2 M	P10321	HLA-C	0.318214	0.23	1.33	2|1|1	0|0|0|0|0|0|0|0|0|0|0	13.33	0.32
SARS-CoV2 M	P10412	H1-4	0.00789574	0.69	0.33	0|0|1	0|1|4|0|0|0|0|0|3|0|0	0.46	0
SARS-CoV2 M	P10599	TXN	0.321618	0.69	7.33	7|7|8	8|7|12|8|10|5|7|8|10|5|9	0.91	0
SARS-CoV2 M	P10606	COX5B	0.371355	0.23	1.33	2|1|1	0|0|0|0|0|0|0|0|0|0|0	13.33	0.32
SARS-CoV2 M	P10809	HSPD1	0.344783	0.02	24.67	26|22|26	12|8|8|3|5|4|6|6|13|12|12	3.05	0.77
SARS-CoV2 M	P11021	HSPA5	0.31855	0.64	18.33	15|19|21	15|11|10|11|12|10|12|7|11|12|10	1.67	0
SARS-CoV2 M	P11142	HSPA8	0.318141	0.69	17	18|17|16	22|15|22|24|23|9|12|19|21|11|14	0.97	0
SARS-CoV2 M	P11166	SLC2A1	0.704269	0.08	1.67	2|2|1	0|0|0|0|0|0|0|0|0|0|0	16.67	0.64
SARS-CoV2 M	P11172	UMPS	0.374488	0.08	1.67	1|2|2	0|0|0|0|0|0|0|0|0|0|0	16.67	0.64
SARS-CoV2 M	P11177	PDHB	0.450456	0	7	7|6|8	0|0|0|1|0|0|0|0|0|0|0	70	1
SARS-CoV2 M	P11310	ACADM	0.724349	0	2.67	4|2|2	0|0|0|0|0|0|0|0|0|0|0	26.67	0.97
SARS-CoV2 M	P11387	TOP1	0.323324	0.68	11	11|13|9	11|12|16|13|12|10|10|7|10|5|8	1.06	0
SARS-CoV2 M	P11498	PC	0.326767	0.69	62	66|54|66	88|80|55|48|44|63|67|42|86|64|68	0.97	0
SARS-CoV2 M	P11586	MTHFD1	0.332868	0.61	7.33	6|8|8	8|3|8|9|2|2|2|2|7|7|5	1.47	0
SARS-CoV2 M	P12004	PCNA	0.387106	0	7	8|7|6	0|0|0|0|0|0|0|0|0|0|0	70	1
SARS-CoV2 M	P12235	SLC25A4	0.408057	0.08	1.67	1|2|2	0|0|0|0|0|0|0|0|0|0|0	16.67	0.64
SARS-CoV2 M	P12236	SLC25A6	0.346816	0.01	7.33	7|7|8	2|2|2|2|2|1|1|2|1|1|2	4.48	0.95
SARS-CoV2 M	P12270	TPR	0.199572	0.46	1	0|2|1	1|1|0|0|2|1|1|1|1|1|1	1.1	0.08
SARS-CoV2 M	P13073	COX4I1	0.211515	0.23	1	2|0|1	0|0|0|0|0|0|0|0|0|0|0	10	0.32
SARS-CoV2 M	P13637	ATP1A3	0.980771	0.23	1.33	2|1|1	0|0|0|0|0|0|0|0|0|0|0	13.33	0.32
SARS-CoV2 M	P13639	EEF2	0.325119	0.67	9	8|10|9	13|14|8|10|8|3|7|9|8|3|6	1.11	0
SARS-CoV2 M	P13674	P4HA1	0.226715	0.23	1	0|2|1	0|0|0|0|0|0|0|0|0|0|0	10	0.32
SARS-CoV2 M	P13797	PLS3	0.310631	0.69	1.67	1|2|2	3|2|3|1|2|2|1|1|3|3|2	0.8	0
SARS-CoV2 M	P13804	ETFA	0.718398	0	2.33	2|2|3	0|0|0|0|0|0|0|0|0|0|0	23.33	0.97
SARS-CoV2 M	P13995	MTHFD2	0.0107981	0.23	0.67	2|0|0	0|0|0|0|1|0|0|0|0|0|0	6.67	0.32
SARS-CoV2 M	P14174	MIF	0.309303	0.69	1.33	2|1|1	3|3|1|2|2|3|4|1|2|1|2	0.61	0
SARS-CoV2 M	P14324	FDPS	0.51993	0.69	1	1|1|1	0|0|0|0|0|0|0|0|0|0|0	10	0
SARS-CoV2 M	P14618	PKM	0.332565	0.49	5	5|5|5	8|3|1|3|0|1|2|2|3|4|2	1.9	0.05
SARS-CoV2 M	P14866	HNRNPL	0.294101	0.69	2	1|2|3	5|13|11|7|1|0|1|1|10|1|1	0.43	0
SARS-CoV2 M	P14868	DARS1	0.0182686	0.69	0.33	0|1|0	0|0|1|1|1|0|1|2|0|0|0	0.61	0
SARS-CoV2 M	P15880	RPS2	0.321603	0.63	8	10|8|6	7|7|6|10|8|4|5|4|8|3|4	1.33	0
SARS-CoV2 M	P16152	CBR1	0.293552	0.69	2.33	3|1|3	7|8|6|6|8|3|5|5|8|5|6	0.38	0
SARS-CoV2 M	P16402	H1-3	0.223996	0.69	0.67	1|1|0	1|2|2|1|0|0|1|0|1|0|0	0.92	0
SARS-CoV2 M	P16403	H1-2	0.330435	0.63	4.33	5|4|4	3|7|6|4|4|5|2|2|5|3|4	1.06	0
SARS-CoV2 M	P16435	POR	0.262796	0.69	0.67	1|1|0	0|0|0|0|0|0|0|0|0|0|0	6.67	0
SARS-CoV2 M	P16615	ATP2A2	0.439746	0	30.67	32|27|33	0|0|0|0|0|0|0|0|0|0|0	306.67	1
SARS-CoV2 M	P17096	HMGA1	0.326736	0.69	2	2|2|2	3|3|1|4|1|2|2|1|5|1|1	0.92	0
SARS-CoV2 M	P17152	TMEM11	0.390161	0.69	0.67	1|0|1	0|0|0|0|0|0|0|0|0|0|0	6.67	0
SARS-CoV2 M	P17655	CAPN2	0.483905	0.69	0.67	1|1|0	0|0|0|0|0|0|0|0|0|0|0	6.67	0
SARS-CoV2 M	P17812	CTPS1	0.354208	0.03	11	15|10|8	3|4|5|5|5|2|1|1|4|5|1	3.36	0.67
SARS-CoV2 M	P17844	DDX5	0.330001	0.66	13	13|11|15	10|10|14|9|12|11|8|10|10|6|7	1.34	0
SARS-CoV2 M	P17858	PFKL	0.430097	0	11.67	13|10|12	0|0|0|0|0|0|0|0|0|0|0	116.67	1
SARS-CoV2 M	P17987	TCP1	0.360611	0	9	11|8|8	0|0|1|2|2|0|0|0|1|2|1	11	1
SARS-CoV2 M	P18031	PTPN1	0.535481	0.08	1.67	2|2|1	0|0|0|0|0|0|0|0|0|0|0	16.67	0.64
SARS-CoV2 M	P18074	ERCC2	0.123838	0.19	1	0|3|0	0|0|0|0|0|0|0|0|0|0|0	10	0.33
SARS-CoV2 M	P18085	ARF4	0.253656	0.08	1.33	2|2|0	0|0|0|0|0|0|0|0|0|0|0	13.33	0.64
SARS-CoV2 M	P18124	RPL7	0.00348801	0.69	0.33	0|1|0	1|2|3|3|0|0|1|0|5|1|1	0.22	0
SARS-CoV2 M	P18621	RPL17	0.277071	0.69	3	1|4|4	6|6|5|6|5|4|2|5|7|7|8	0.54	0
SARS-CoV2 M	P18754	RCC1	0.0110689	0.69	0.33	0|0|1	1|1|2|2|0|1|0|0|1|0|1	0.41	0
SARS-CoV2 M	P18859	ATP5PF	0.358663	0.05	2	3|2|1	0|0|0|0|0|0|0|0|0|0|0	20	0.65
SARS-CoV2 M	P19404	NDUFV2	0.201759	0.69	0.33	0|1|0	0|0|0|0|0|0|0|0|0|0|0	3.33	0
SARS-CoV2 M	P20020	ATP2B1	0.669096	0	7.33	10|5|7	0|0|0|0|0|0|0|0|0|0|0	73.33	1
SARS-CoV2 M	P20340	RAB6A	0.463689	0.23	1	2|1|0	0|0|0|0|0|0|0|0|0|0|0	10	0.32
SARS-CoV2 M	P20674	COX5A	0.225732	0.69	0.67	1|0|1	0|0|0|0|0|0|0|0|0|0|0	6.67	0
SARS-CoV2 M	P20700	LMNB1	0.351432	0.02	11.67	10|13|12	3|9|6|4|1|1|0|0|9|0|0	3.89	0.76
SARS-CoV2 M	P20719	HOXA5	0.0166977	0.69	0.33	0|0|1	1|0|0|0|1|0|0|0|1|1|0	0.92	0
SARS-CoV2 M	P21741	MDK	0.329834	0.49	3.33	4|2|4	4|0|4|3|3|2|2|1|4|0|0	1.59	0.05
SARS-CoV2 M	P21796	VDAC1	0.429993	0	21.67	23|20|22	0|0|0|0|0|0|0|0|0|0|0	216.67	1
SARS-CoV2 M	P21912	SDHB	0.00823238	0.69	0.33	1|0|0	0|0|1|0|0|0|0|0|0|0|0	3.33	0
SARS-CoV2 M	P21953	BCKDHB	0.40906	0.23	1.33	1|1|2	0|0|0|0|0|0|0|0|0|0|0	13.33	0.32
SARS-CoV2 M	P21964	COMT	0.134915	0.23	0.67	2|0|0	0|0|0|0|0|0|0|0|0|0|0	6.67	0.32
SARS-CoV2 M	P22061	PCMT1	0.32631	0.69	15.67	16|14|17	16|14|18|20|22|14|13|17|20|7|16	0.97	0
SARS-CoV2 M	P22087	FBL	0.180253	0.57	1	1|2|0	1|3|4|5|1|1|0|1|2|1|0	0.58	0.01
SARS-CoV2 M	P22102	GART	0.332567	0.52	4.67	5|5|4	4|2|7|4|1|3|2|3|4|0|0	1.71	0.03
SARS-CoV2 M	P22626	HNRNPA2B1	0.192729	0.69	3	1|7|1	9|28|26|26|0|2|4|1|21|2|1	0.28	0
SARS-CoV2 M	P22695	UQCRC2	0.414769	0	6.67	8|7|5	0|0|0|0|0|0|0|0|0|0|0	66.67	1
SARS-CoV2 M	P23193	TCEA1	0.00444487	0.69	0.33	0|1|0	1|1|0|3|1|2|0|0|0|3|0	0.33	0
SARS-CoV2 M	P23246	SFPQ	0.197644	0.69	0.67	0|1|1	1|10|6|8|2|2|2|2|5|4|1	0.17	0
SARS-CoV2 M	P23284	PPIB	0.325064	0.69	20.67	20|21|21	21|25|24|22|20|21|18|18|23|20|21	0.98	0
SARS-CoV2 M	P23396	RPS3	0.330842	0.65	19.33	22|18|18	21|10|15|15|8|5|6|12|12|12|8	1.72	0
SARS-CoV2 M	P23528	CFL1	0.324896	0.61	6.67	8|4|8	6|7|6|6|5|6|2|3|8|2|4	1.33	0
SARS-CoV2 M	P23634	ATP2B4	0.429226	0.23	1	2|0|1	0|0|0|0|0|0|0|0|0|0|0	10	0.32
SARS-CoV2 M	P24390	KDELR1	0.454195	0.08	1.67	2|2|1	0|0|0|0|0|0|0|0|0|0|0	16.67	0.64
SARS-CoV2 M	P24468	NR2F2	0.68551	0.69	0.33	1|0|0	0|0|0|0|0|0|0|0|0|0|0	3.33	0
SARS-CoV2 M	P24539	ATP5PB	0.368934	0	3.67	5|3|3	0|0|0|0|0|0|0|0|0|0|0	36.67	1
SARS-CoV2 M	P24752	ACAT1	0.070589	0.69	0.33	0|0|1	0|0|0|0|0|0|0|0|0|0|0	3.33	0
SARS-CoV2 M	P24941	CDK2	0.123712	0.69	0.33	0|1|0	0|0|0|0|0|0|0|0|0|0|0	3.33	0
SARS-CoV2 M	P25205	MCM3	0.325387	0.5	5.33	7|6|3	6|4|4|3|4|0|0|2|3|2|7	1.68	0.04
SARS-CoV2 M	P25398	RPS12	0.337085	0.56	10	11|10|9	8|7|7|7|5|3|4|4|9|2|3	1.86	0.01
SARS-CoV2 M	P25686	DNAJB2	0.546025	0.23	1	2|0|1	0|0|0|0|0|0|0|0|0|0|0	10	0.32
SARS-CoV2 M	P25705	ATP5F1A	0.365602	0	31.67	31|30|34	4|5|7|4|8|5|3|4|5|6|4	6.33	1
SARS-CoV2 M	P25789	PSMA4	0.308599	0.69	0.67	1|1|0	0|0|0|0|0|0|0|0|0|0|0	6.67	0
SARS-CoV2 M	P26196	DDX6	0.314113	0.54	1.67	1|2|2	1|3|1|1|3|3|0|0|3|1|2	1.02	0.02
SARS-CoV2 M	P26368	U2AF2	0.322515	0.69	13	12|13|14	15|16|16|24|18|16|11|13|16|10|11	0.86	0
SARS-CoV2 M	P26373	RPL13	0.318728	0.6	4.33	5|5|3	3|4|6|4|1|3|3|3|5|4|3	1.22	0
SARS-CoV2 M	P26583	HMGB2	0.313265	0.68	10	7|11|12	9|13|12|20|16|14|4|13|13|7|10	0.84	0
SARS-CoV2 M	P26599	PTBP1	0.311837	0.63	5.67	7|7|3	7|7|6|6|3|3|2|3|8|5|4	1.15	0
SARS-CoV2 M	P26641	EEF1G	0.349642	0.41	9	11|8|8	5|3|6|5|5|3|5|4|4|2|4	2.15	0.15
SARS-CoV2 M	P26885	FKBP2	0.00702029	0.69	0.33	0|1|0	1|2|2|2|1|1|1|0|2|1|1	0.26	0
SARS-CoV2 M	P27105	STOM	0.752972	0	3	4|2|3	0|0|0|0|0|0|0|0|0|0|0	30	0.98
SARS-CoV2 M	P27348	YWHAQ	0.228855	0.23	1	2|0|1	0|0|0|1|0|0|0|0|0|0|0	10	0.32
SARS-CoV2 M	P27544	CERS1	0.64491	0.03	2.67	3|1|4	0|0|0|0|0|0|0|0|0|0|0	26.67	0.66
SARS-CoV2 M	P27635	RPL10	0.279154	0.65	3.33	2|2|6	7|6|6|6|5|5|5|7|6|3|3	0.62	0
SARS-CoV2 M	P27695	APEX1	0.298718	0.69	1.67	1|2|2	6|5|3|15|8|5|2|4|2|2|3	0.33	0
SARS-CoV2 M	P27708	CAD	0.301592	0.4	1.33	1|2|1	0|0|0|1|1|1|0|2|0|0|1	2.44	0.17
SARS-CoV2 M	P27816	MAP4	0.250176	0.62	2	1|4|1	6|2|3|4|2|4|3|2|4|4|3	0.59	0
SARS-CoV2 M	P27824	CANX	0.415684	0	20.33	24|17|20	0|0|0|0|0|0|0|0|0|0|0	203.33	1
SARS-CoV2 M	P28070	PSMB4	0.202497	0.69	0.67	1|0|1	2|2|2|0|1|1|3|0|1|5|3	0.37	0
SARS-CoV2 M	P28331	NDUFS1	0.238259	0.23	1	0|2|1	0|0|0|0|0|0|0|0|0|0|0	10	0.32
SARS-CoV2 M	P29372	MPG	0.319595	0.66	6.67	9|5|6	6|6|8|8|10|4|6|6|7|8|6	0.98	0
SARS-CoV2 M	P29692	EEF1D	0.330908	0.61	3	3|3|3	2|1|4|1|4|3|3|3|6|2|3	1.03	0
SARS-CoV2 M	P29966	MARCKS	0.0566474	0.69	0.33	1|0|0	0|0|0|0|0|0|0|0|0|0|0	3.33	0
SARS-CoV2 M	P30041	PRDX6	0.200063	0.69	0.67	1|1|0	3|6|5|4|3|2|1|1|2|2|1	0.24	0
SARS-CoV2 M	P30048	PRDX3	0.347976	0.39	4	4|4|4	3|1|4|2|2|0|0|1|2|2|3	2.2	0.17
SARS-CoV2 M	P30049	ATP5F1D	0.381038	0.69	1	1|1|1	0|0|0|0|0|0|0|0|0|0|0	10	0
SARS-CoV2 M	P30050	RPL12	0.00313602	0.69	0.33	0|1|0	2|5|5|4|0|0|2|0|5|0|0	0.16	0
SARS-CoV2 M	P30101	PDIA3	0.308385	0.65	5.67	4|8|5	8|7|8|9|6|4|2|4|8|7|6	0.9	0
SARS-CoV2 M	P30153	PPP2R1A	0.343634	0.15	1.67	2|1|2	0|0|1|0|0|0|0|0|2|1|1	3.67	0.39
SARS-CoV2 M	P30154	PPP2R1B	0.711781	0.08	1.67	1|2|2	0|0|0|0|0|0|0|0|0|0|0	16.67	0.64
SARS-CoV2 M	P30405	PPIF	0.0122163	0.69	0.33	0|0|1	1|3|2|1|1|0|1|2|2|0|1	0.26	0
SARS-CoV2 M	P30533	LRPAP1	0.00467246	0.69	0.67	0|2|0	2|7|2|7|4|3|1|1|2|5|3	0.2	0
SARS-CoV2 M	P30536	TSPO	0.258602	0.69	0.67	1|1|0	0|0|0|0|0|0|0|0|0|0|0	6.67	0
SARS-CoV2 M	P30825	SLC7A1	0.550585	0	4	5|3|4	0|0|0|0|0|0|0|0|0|0|0	40	1
SARS-CoV2 M	P30837	ALDH1B1	0.455392	0	16.33	14|18|17	0|0|0|0|0|0|0|0|0|0|0	163.33	1
SARS-CoV2 M	P31040	SDHA	0.331139	0.02	2.67	3|2|3	2|0|2|1|0|0|0|0|1|0|0	4.89	0.7
SARS-CoV2 M	P31153	MAT2A	0.206416	0.69	0.67	1|1|0	1|0|1|1|1|0|1|1|2|0|1	0.81	0
SARS-CoV2 M	P31689	DNAJA1	0.347172	0	17	18|17|16	0|0|2|6|7|0|0|7|1|1|1	7.48	0.98
SARS-CoV2 M	P31930	UQCRC1	0.235469	0.69	0.67	1|0|1	0|0|0|0|0|0|0|0|0|0|0	6.67	0
SARS-CoV2 M	P31943	HNRNPH1	0.353724	0.12	5.67	7|5|5	1|4|3|3|0|1|1|2|2|1|3	2.97	0.53
SARS-CoV2 M	P31946	YWHAB	0.345402	0.69	0.67	1|0|1	0|0|0|0|0|0|0|0|0|0|0	6.67	0
SARS-CoV2 M	P32119	PRDX2	0.251248	0.39	1	2|1|0	1|0|1|0|1|0|0|0|1|0|1	2.2	0.19
SARS-CoV2 M	P32121	ARRB2	0.324096	0.69	9	8|9|10	14|12|17|10|9|8|10|8|15|5|8	0.85	0
SARS-CoV2 M	P32189	GK	0.115767	0.69	0.33	0|0|1	0|0|0|0|0|0|0|0|0|0|0	3.33	0
SARS-CoV2 M	P32322	PYCR1	0.50124	0	3.67	4|3|4	0|0|0|0|0|0|0|0|0|0|0	36.67	1
SARS-CoV2 M	P32969	RPL9	0.319846	0.69	6.33	6|7|6	6|8|10|12|8|6|6|7|5|4|8	0.87	0
SARS-CoV2 M	P33316	DUT	0.327822	0.62	5.67	5|7|5	4|5|5|6|5|5|5|5|6|2|3	1.22	0
SARS-CoV2 M	P33981	TTK	0.196412	0.69	0.33	1|0|0	0|0|0|0|0|0|0|0|0|0|0	3.33	0
SARS-CoV2 M	P33992	MCM5	0.326343	0.56	3.33	4|3|3	4|3|3|3|1|1|1|1|2|7|2	1.31	0.01
SARS-CoV2 M	P33993	MCM7	0.464658	0	3	5|2|2	0|0|0|0|0|0|0|0|0|0|0	30	0.97
SARS-CoV2 M	P34897	SHMT2	0.518776	0.69	1	1|1|1	0|0|0|0|0|0|0|0|0|0|0	10	0
SARS-CoV2 M	P35030	PRSS3	0.326033	0.69	1	1|1|1	1|1|1|1|1|1|1|1|1|1|1	1	0
SARS-CoV2 M	P35080	PFN2	0.329512	0.47	1.67	2|1|2	1|1|0|1|2|2|1|1|2|1|1	1.41	0.07
SARS-CoV2 M	P35232	PHB	0.32633	0.62	7.67	9|5|9	4|4|10|3|6|3|8|4|6|7|6	1.38	0
SARS-CoV2 M	P35268	RPL22	0.318055	0.66	6.33	5|6|8	5|6|5|7|10|7|6|8|7|7|7	0.93	0
SARS-CoV2 M	P35527	KRT9	0.0428016	0.69	0.33	0|0|1	0|0|0|0|1|0|0|0|0|0|0	3.33	0
SARS-CoV2 M	P35606	COPB2	0.39674	0.23	1.33	1|2|1	0|0|0|0|0|0|0|0|0|0|0	13.33	0.32
SARS-CoV2 M	P35610	SOAT1	0.0191922	0.69	0.33	1|0|0	0|0|0|0|0|0|0|0|0|0|0	3.33	0
SARS-CoV2 M	P35613	BSG	0.467178	0	8.67	10|8|8	0|0|0|0|0|0|0|0|0|0|0	86.67	1
SARS-CoV2 M	P35637	FUS	0.00679733	0.69	0.33	1|0|0	1|2|4|2|0|0|0|0|2|2|1	0.26	0
SARS-CoV2 M	P35659	DEK	0.323711	0.69	9	9|8|10	9|11|12|16|13|6|7|10|12|8|8	0.88	0
SARS-CoV2 M	P35998	PSMC2	0.369822	0.69	1	1|1|1	0|0|0|0|0|0|0|0|0|0|0	10	0
SARS-CoV2 M	P36542	ATP5F1C	0.3835	0	9	10|8|9	0|0|0|2|0|0|0|0|0|2|0	24.75	1
SARS-CoV2 M	P36578	RPL4	0.00341046	0.69	0.67	0|2|0	0|5|8|8|0|0|0|0|6|0|0	0.27	0
SARS-CoV2 M	P36897	TGFBR1	0.364827	0.69	0.67	1|1|0	0|0|0|0|0|0|0|0|0|0|0	6.67	0
SARS-CoV2 M	P36969	GPX4	0.190258	0.58	1	2|1|0	2|3|3|4|3|0|0|2|3|0|0	0.55	0
SARS-CoV2 M	P37108	SRP14	0.300275	0.6	2.33	3|1|3	2|3|3|3|5|2|1|3|3|2|3	0.86	0
SARS-CoV2 M	P37268	FDFT1	0.68551	0.69	0.33	1|0|0	0|0|0|0|0|0|0|0|0|0|0	3.33	0
SARS-CoV2 M	P37802	TAGLN2	0.326315	0.69	1	1|1|1	2|1|1|1|0|0|0|0|3|0|1	1.22	0
SARS-CoV2 M	P38435	GGCX	0.789967	0.01	2	2|2|2	0|0|0|0|0|0|0|0|0|0|0	20	0.96
SARS-CoV2 M	P38606	ATP6V1A	0.794938	0.05	2.67	5|1|2	0|0|0|0|0|0|0|0|0|0|0	26.67	0.65
SARS-CoV2 M	P38646	HSPA9	0.319674	0.68	17.33	18|18|16	17|12|18|17|18|15|12|9|13|14|15	1.19	0
SARS-CoV2 M	P39019	RPS19	0.327716	0.67	10	10|9|11	14|12|9|14|6|4|5|7|8|10|8	1.13	0
SARS-CoV2 M	P39656	DDOST	0.319295	0.03	2.67	4|1|3	0|0|0|0|0|0|0|0|0|0|0	26.67	0.66
SARS-CoV2 M	P39748	FEN1	0.303839	0.69	3.33	2|4|4	11|9|3|14|9|4|2|1|1|5|10	0.53	0
SARS-CoV2 M	P40227	CCT6A	0.312184	0.11	1.67	1|2|2	0|0|0|1|0|0|0|0|1|0|0	9.17	0.59
SARS-CoV2 M	P40616	ARL1	0.410563	0	4.67	4|4|6	0|0|0|0|0|0|0|0|0|0|0	46.67	1
SARS-CoV2 M	P40926	MDH2	0.0064487	0.69	0.33	0|1|0	3|1|1|1|1|1|0|0|4|1|2	0.24	0
SARS-CoV2 M	P40937	RFC5	0.425712	0.08	1.67	2|2|1	0|0|0|0|0|0|0|0|0|0|0	16.67	0.64
SARS-CoV2 M	P40938	RFC3	0.429354	0	2.33	3|2|2	0|0|0|0|0|0|0|0|0|0|0	23.33	0.97
SARS-CoV2 M	P40939	HADHA	0.439102	0	13.67	13|12|16	0|0|1|3|0|0|0|0|0|0|0	37.58	1
SARS-CoV2 M	P41223	BUD31	0.300012	0.62	2	2|1|3	3|3|3|4|4|1|2|3|3|3|2	0.71	0
SARS-CoV2 M	P42167	TMPO	0.369608	0.01	2	2|2|2	0|0|0|0|0|0|0|0|0|0|0	20	0.96
SARS-CoV2 M	P42677	RPS27	0.331082	0.56	5.33	5|5|6	4|5|3|5|2|2|4|4|4|2|2	1.59	0.01
SARS-CoV2 M	P42704	LRPPRC	0.528329	0	5	7|4|4	0|0|0|0|0|0|0|0|0|0|0	50	1
SARS-CoV2 M	P42766	RPL35	0.326434	0.61	3.33	4|3|3	5|2|2|3|3|3|3|3|4|2|4	1.08	0
SARS-CoV2 M	P42771	CDKN2A	0.0479165	0.69	0.33	1|0|0	0|0|0|0|0|0|0|0|0|0|0	3.33	0
SARS-CoV2 M	P43003	SLC1A3	0.688209	0	3	3|4|2	0|0|0|0|0|0|0|0|0|0|0	30	0.98
SARS-CoV2 M	P43007	SLC1A4	0.489699	0.19	1.33	1|3|0	0|0|0|0|0|0|0|0|0|0|0	13.33	0.33
SARS-CoV2 M	P43246	MSH2	0.551305	0.18	1.67	5|0|0	0|0|0|0|0|0|0|0|0|0|0	16.67	0.33
SARS-CoV2 M	P43307	SSR1	0.368644	0.08	1.67	2|2|1	0|0|0|0|0|0|0|0|0|0|0	16.67	0.64
SARS-CoV2 M	P43487	RANBP1	0.453013	0	4.67	7|3|4	1|0|0|0|0|0|0|0|0|0|1	25.67	0.99
SARS-CoV2 M	P43490	NAMPT	0.454343	0	3.33	2|5|3	0|0|0|0|0|0|0|0|0|0|0	33.33	0.99
SARS-CoV2 M	P45880	VDAC2	0.395207	0	23	25|21|23	0|0|0|0|0|0|0|0|0|0|0	230	1
SARS-CoV2 M	P45954	ACADSB	0.68551	0.69	0.33	0|1|0	0|0|0|0|0|0|0|0|0|0|0	3.33	0
SARS-CoV2 M	P46109	CRKL	0.315394	0.69	11.33	9|10|15	18|15|15|18|16|12|15|12|18|14|14	0.75	0
SARS-CoV2 M	P46776	RPL27A	0.200146	0.69	0.67	0|1|1	0|3|3|2|2|2|2|1|2|1|1	0.39	0
SARS-CoV2 M	P46778	RPL21	0.327511	0.57	3.67	4|3|4	4|4|3|4|4|3|1|1|2|3|1	1.34	0.01
SARS-CoV2 M	P46779	RPL28	0.299459	0.58	1.33	1|2|1	1|2|2|2|2|2|1|2|3|1|2	0.73	0
SARS-CoV2 M	P46781	RPS9	0.267301	0.69	1.67	1|3|1	1|4|4|4|3|6|2|2|6|6|5	0.43	0
SARS-CoV2 M	P46782	RPS5	0.33821	0.14	11.67	14|11|10	6|7|2|10|4|3|3|2|3|4|2	2.79	0.45
SARS-CoV2 M	P46783	RPS10	0.282232	0.61	3	1|4|4	5|4|2|7|3|1|1|4|2|3|4	0.92	0
SARS-CoV2 M	P46977	STT3A	0.405818	0	7	6|7|8	0|0|0|0|0|0|0|0|0|0|0	70	1
SARS-CoV2 M	P47756	CAPZB	0.00394698	0.69	0.33	1|0|0	2|1|3|4|2|1|0|3|3|0|1	0.18	0
SARS-CoV2 M	P47813	EIF1AX	0.308282	0.51	1.33	1|2|1	1|2|2|1|2|1|2|1|1|0|0	1.13	0.04
SARS-CoV2 M	P47914	RPL29	0.208216	0.69	0.67	1|0|1	1|1|1|1|1|0|0|1|1|0|1	0.92	0
SARS-CoV2 M	P47985	UQCRFS1	0.569525	0.69	1	1|1|1	0|0|0|0|0|0|0|0|0|0|0	10	0
SARS-CoV2 M	P48047	ATP5PO	0.409571	0	9	9|9|9	1|0|1|1|1|0|0|0|1|1|1	14.14	1
SARS-CoV2 M	P48444	ARCN1	0.409482	0	6.67	6|7|7	0|0|0|0|0|0|0|0|0|0|0	66.67	1
SARS-CoV2 M	P48507	GCLM	0.316866	0.55	1.33	2|1|1	2|1|1|1|1|1|1|1|4|2|2	0.86	0.01
SARS-CoV2 M	P48556	PSMD8	0.881425	0.05	2	2|3|1	0|0|0|0|0|0|0|0|0|0|0	20	0.65
SARS-CoV2 M	P48634	PRRC2A	0.0527368	0.69	0.33	1|0|0	0|0|0|0|0|0|0|0|0|0|0	3.33	0
SARS-CoV2 M	P48643	CCT5	0.294038	0.08	3	5|3|1	0|1|0|0|1|0|0|1|0|0|0	11	0.65
SARS-CoV2 M	P48651	PTDSS1	0.62092	0	8.67	7|11|8	0|0|0|0|0|0|0|0|0|0|0	86.67	1
SARS-CoV2 M	P48729	CSNK1A1	0.0135822	0.69	0.33	0|0|1	1|0|1|1|0|0|1|2|0|0|1	0.52	0
SARS-CoV2 M	P48730	CSNK1D	0.312731	0.37	2.67	3|1|4	2|3|3|2|1|0|0|1|0|1|2	1.96	0.23
SARS-CoV2 M	P48735	IDH2	0.868578	0.23	1	2|1|0	0|0|0|0|0|0|0|0|0|0|0	10	0.32
SARS-CoV2 M	P49006	MARCKSL1	0.0289826	0.69	0.33	1|0|0	0|0|0|0|0|0|0|0|0|0|0	3.33	0
SARS-CoV2 M	P49327	FASN	0.0219588	0.23	0.67	2|0|0	0|0|0|1|0|0|0|0|0|0|0	6.67	0.32
SARS-CoV2 M	P49368	CCT3	0.385993	0	13	18|12|9	0|0|1|0|2|0|0|0|1|0|0	35.75	1
SARS-CoV2 M	P49411	TUFM	0.393913	0	19.67	27|17|15	3|0|0|0|0|0|0|0|2|4|1	21.63	1
SARS-CoV2 M	P49458	SRP9	0.317253	0.6	2.67	3|3|2	1|2|4|5|4|2|3|3|4|1|1	0.98	0
SARS-CoV2 M	P49593	PPM1F	0.504833	0.18	2.33	5|1|1	0|0|0|0|0|0|0|0|0|0|0	23.33	0.33
SARS-CoV2 M	P49674	CSNK1E	0.20854	0.49	1.67	3|2|0	1|3|0|3|1|2|1|1|2|2|1	1.08	0.05
SARS-CoV2 M	P49721	PSMB2	0.515787	0.08	1.67	2|1|2	0|0|0|0|0|0|0|0|0|0|0	16.67	0.64
SARS-CoV2 M	P49755	TMED10	0.403126	0	2.33	2|2|3	0|0|0|0|0|0|0|0|0|0|0	23.33	0.97
SARS-CoV2 M	P49756	RBM25	0.317799	0.69	2.33	3|2|2	6|4|4|5|3|3|3|1|4|2|2	0.69	0
SARS-CoV2 M	P49768	PSEN1	0.538074	0.69	1	1|1|1	0|0|0|0|0|0|0|0|0|0|0	10	0
SARS-CoV2 M	P49810	PSEN2	0.0761803	0.69	0.33	1|0|0	0|0|0|0|0|0|0|0|0|0|0	3.33	0
SARS-CoV2 M	P49841	GSK3B	0.37274	0.69	1	1|1|1	1|0|2|1|0|0|0|1|0|1|0	1.83	0
SARS-CoV2 M	P49915	GMPS	0.21384	0.54	1.33	2|2|0	0|3|1|2|1|2|2|2|1|1|3	0.81	0.02
SARS-CoV2 M	P50402	EMD	0.421522	0	17.33	19|17|16	1|0|2|2|0|0|0|0|1|0|0	31.78	1
SARS-CoV2 M	P50416	CPT1A	0.0346874	0.69	0.33	1|0|0	0|0|0|0|0|0|0|0|0|0|0	3.33	0
SARS-CoV2 M	P50454	SERPINH1	0.324132	0.02	5	6|3|6	1|0|3|2|0|0|0|1|1|2|2	4.58	0.77
SARS-CoV2 M	P50750	CDK9	0.22543	0.69	0.67	1|0|1	0|0|0|1|1|0|0|0|0|0|0	3.67	0
SARS-CoV2 M	P50897	PPT1	0.234263	0.69	0.67	1|1|0	0|0|0|0|0|0|0|0|0|0|0	6.67	0
SARS-CoV2 M	P50914	RPL14	0.0076297	0.55	0.67	0|2|0	3|5|4|1|0|0|1|0|3|0|1	0.41	0.01
SARS-CoV2 M	P50990	CCT8	0.315157	0.01	4.33	6|2|5	1|0|0|0|0|1|0|0|0|0|1	15.89	0.93
SARS-CoV2 M	P50991	CCT4	0.371199	0	12	15|10|11	0|0|1|2|5|0|1|2|0|1|1	10.15	1
SARS-CoV2 M	P51148	RAB5C	0.227946	0.69	0.67	1|1|0	0|0|0|0|0|0|0|0|0|0|0	6.67	0
SARS-CoV2 M	P51570	GALK1	0.550915	0	4.67	6|4|4	0|0|0|0|0|0|0|0|0|0|0	46.67	1
SARS-CoV2 M	P51571	SSR4	0.346174	0	6.33	6|8|5	1|1|1|1|0|1|1|1|1|1|0	7.74	0.97
SARS-CoV2 M	P51617	IRAK1	0.362588	0.23	1.33	2|1|1	0|0|0|0|0|0|0|0|0|0|0	13.33	0.32
SARS-CoV2 M	P51648	ALDH3A2	0.425853	0	3.33	4|3|3	0|0|0|0|0|0|0|0|0|0|0	33.33	1
SARS-CoV2 M	P51858	HDGF	0.21434	0.69	0.67	1|1|0	0|2|2|3|0|1|0|1|1|0|1	0.67	0
SARS-CoV2 M	P51970	NDUFA8	0.206714	0.37	1.67	3|0|2	1|3|2|2|1|0|0|0|1|1|0	1.67	0.21
SARS-CoV2 M	P51991	HNRNPA3	0.0078458	0.69	0.67	0|2|0	1|9|10|6|0|0|0|0|4|1|0	0.24	0
SARS-CoV2 M	P52272	HNRNPM	0.30966	0.65	6.33	7|8|4	7|16|12|8|2|1|3|2|12|4|3	1	0
SARS-CoV2 M	P52292	KPNA2	0.3945	0	4.67	6|5|3	0|0|0|1|0|0|0|0|0|0|0	46.67	1
SARS-CoV2 M	P52434	POLR2H	0.0184481	0.69	0.33	0|1|0	0|0|0|0|0|0|0|0|0|0|0	3.33	0
SARS-CoV2 M	P52597	HNRNPF	0.335213	0.36	8.67	11|6|9	4|6|3|12|2|1|0|1|5|1|4	2.44	0.24
SARS-CoV2 M	P52701	MSH6	0.143502	0.69	0.33	0|0|1	0|0|0|0|0|0|0|0|0|0|0	3.33	0
SARS-CoV2 M	P52789	HK2	0.179412	0.69	0.33	0|0|1	0|0|0|0|0|0|0|0|0|0|0	3.33	0
SARS-CoV2 M	P52907	CAPZA1	0.217544	0.38	1.33	2|0|2	1|0|0|1|0|1|0|1|3|1|1	1.63	0.2
SARS-CoV2 M	P52926	HMGA2	0.372519	0.14	2	2|2|2	0|0|0|1|1|1|1|1|2|0|0	3.14	0.44
SARS-CoV2 M	P53007	SLC25A1	0.402167	0	8.33	9|6|10	0|0|0|0|0|0|0|0|0|0|0	83.33	1
SARS-CoV2 M	P53350	PLK1	0.303117	0.69	2	3|1|2	6|8|6|2|2|1|0|3|5|1|3	0.59	0
SARS-CoV2 M	P53396	ACLY	0.321997	0.69	0.33	1|0|0	0|0|0|0|0|0|0|0|0|0|0	3.33	0
SARS-CoV2 M	P53597	SUCLG1	0.350036	0.12	1.67	2|1|2	0|0|1|1|1|0|0|0|0|0|0	6.11	0.52
SARS-CoV2 M	P53618	COPB1	0.418756	0	39.33	41|35|42	0|0|1|1|0|0|0|2|0|0|0	108.17	1
SARS-CoV2 M	P53794	SLC5A3	0.462879	0.19	1.33	3|1|0	0|0|0|0|0|0|0|0|0|0|0	13.33	0.33
SARS-CoV2 M	P53985	SLC16A1	0.423002	0	9.67	10|11|8	0|0|0|0|0|0|0|0|0|0|0	96.67	1
SARS-CoV2 M	P53999	SUB1	0.320432	0.69	9.33	9|9|10	12|13|15|15|13|11|12|10|13|11|11	0.75	0
SARS-CoV2 M	P54136	RARS1	0.246121	0.16	2	4|0|2	2|0|0|0|1|1|1|0|0|2|2	2.44	0.37
SARS-CoV2 M	P54709	ATP1B3	0.482007	0	10.67	14|7|11	0|0|0|0|0|0|0|0|0|0|0	106.67	1
SARS-CoV2 M	P54819	AK2	0.0212498	0.69	0.33	0|0|1	1|0|3|1|0|0|0|0|0|0|0	0.73	0
SARS-CoV2 M	P54886	ALDH18A1	0.322847	0.62	3	3|2|4	6|1|5|3|0|1|2|3|5|5|5	0.92	0
SARS-CoV2 M	P55060	CSE1L	0.450484	0	8.67	9|8|9	0|0|0|0|0|0|0|0|0|0|0	86.67	1
SARS-CoV2 M	P55081	MFAP1	0.0058934	0.69	0.67	0|2|0	4|4|3|3|4|4|4|3|5|1|2	0.2	0
SARS-CoV2 M	P55085	F2RL1	0.0698753	0.69	0.33	0|1|0	0|0|0|0|0|0|0|0|0|0|0	3.33	0
SARS-CoV2 M	P55145	MANF	0.0016763	0.69	0.33	0|1|0	2|5|2|10|5|5|1|1|3|2|3	0.09	0
SARS-CoV2 M	P55209	NAP1L1	0.220635	0.34	1	1|2|0	0|0|0|3|0|0|0|0|0|0|0	3.67	0.27
SARS-CoV2 M	P55769	SNU13	0.310478	0.69	1.67	2|2|1	3|2|2|2|2|2|1|2|4|2|1	0.8	0
SARS-CoV2 M	P55786	NPEPPS	0.600688	0.01	2	2|2|2	0|0|0|0|0|0|0|0|0|0|0	20	0.96
SARS-CoV2 M	P55795	HNRNPH2	0.282933	0.23	1	2|1|0	0|0|1|0|0|0|0|0|0|0|0	10	0.32
SARS-CoV2 M	P56134	ATP5MF	0.38973	0	2.33	2|3|2	0|0|0|0|0|0|0|0|0|0|0	23.33	0.97
SARS-CoV2 M	P56182	RRP1	0.0253597	0.69	0.33	0|1|0	0|1|0|1|0|0|0|0|0|0|0	1.83	0
SARS-CoV2 M	P56192	MARS1	0.551577	0	8.67	12|8|6	0|0|0|0|0|0|0|0|0|0|0	86.67	1
SARS-CoV2 M	P56270	MAZ	0.30477	0.6	6.33	4|5|10	8|5|8|6|7|4|2|5|10|1|3	1.18	0
SARS-CoV2 M	P56385	ATP5ME	0.290517	0.69	0.67	1|0|1	0|0|0|0|0|0|0|0|0|0|0	6.67	0
SARS-CoV2 M	P56962	STX17	0.477559	0.23	1.33	1|1|2	0|0|0|0|0|0|0|0|0|0|0	13.33	0.32
SARS-CoV2 M	P57060	RWDD2B	0.214857	0.69	1.33	2|0|2	2|3|1|3|3|1|2|0|3|2|2	0.67	0
SARS-CoV2 M	P57088	TMEM33	0.424991	0	8.67	9|7|10	0|0|0|0|0|0|0|0|0|0|0	86.67	1
SARS-CoV2 M	P57105	SYNJ2BP	0.283289	0.69	0.67	1|1|0	0|0|0|0|0|0|0|0|0|0|0	6.67	0
SARS-CoV2 M	P57737	CORO7	0.0312072	0.69	0.33	0|1|0	0|0|0|0|0|0|0|0|0|0|0	3.33	0
SARS-CoV2 M	P58546	MTPN	0.00527171	0.69	0.33	0|0|1	3|1|3|2|1|0|1|0|1|1|2	0.24	0
SARS-CoV2 M	P60059	SEC61G	0.456352	0.69	1	1|1|1	0|0|0|0|0|0|0|0|0|0|0	10	0
SARS-CoV2 M	P60228	EIF3E	0.0728019	0.69	0.33	1|0|0	0|0|0|0|0|0|0|0|0|0|0	3.33	0
SARS-CoV2 M	P60468	SEC61B	0.339662	0.11	2.33	2|3|2	1|1|2|1|0|0|0|0|0|0|1	4.28	0.6
SARS-CoV2 M	P60507	ERVFC1	0.0249757	0.69	0.33	0|0|1	0|0|0|0|0|1|0|0|1|1|0	1.22	0
SARS-CoV2 M	P60602	ROMO1	0.446888	0.69	1	1|1|1	0|0|0|0|0|0|0|0|0|0|0	10	0
SARS-CoV2 M	P60604	UBE2G2	0.606231	0	4	4|4|4	0|0|0|0|0|0|0|0|0|0|0	40	1
SARS-CoV2 M	P60709	ACTB	0.32849	0.44	1.33	1|1|2	1|1|1|1|1|1|0|1|2|0|0	1.63	0.1
SARS-CoV2 M	P60842	EIF4A1	0.230446	0.69	0.67	0|1|1	0|0|1|1|0|0|0|0|0|0|0	3.67	0
SARS-CoV2 M	P60866	RPS20	0.32496	0.65	7.33	8|6|8	7|6|8|9|6|5|4|6|6|6|7	1.15	0
SARS-CoV2 M	P60891	PRPS1	0.349738	0.19	1.67	3|1|1	0|0|0|0|0|0|0|0|0|0|0	16.67	0.33
SARS-CoV2 M	P60953	CDC42	0.333588	0.23	1	2|0|1	0|0|0|0|0|0|0|0|0|0|0	10	0.32
SARS-CoV2 M	P60981	DSTN	0.205948	0.69	0.67	1|1|0	1|1|2|2|2|2|0|1|1|0|0	0.61	0
SARS-CoV2 M	P61009	SPCS3	0.0231672	0.69	0.33	1|0|0	0|0|0|0|0|0|0|0|0|0|0	3.33	0
SARS-CoV2 M	P61106	RAB14	0.0310199	0.23	0.67	2|0|0	0|0|0|0|0|0|0|0|0|0|0	6.67	0.32
SARS-CoV2 M	P61160	ACTR2	0.880121	0.08	1.33	2|0|2	0|0|0|0|0|0|0|0|0|0|0	13.33	0.64
SARS-CoV2 M	P61163	ACTR1A	0.529552	0.05	2.33	4|1|2	0|0|0|0|0|0|0|0|0|0|0	23.33	0.65
SARS-CoV2 M	P61165	TMEM258	0.4121	0.69	1	1|1|1	0|0|0|0|0|0|0|0|0|0|0	10	0
SARS-CoV2 M	P61247	RPS3A	0.318682	0.69	7.33	7|6|9	9|15|15|16|15|10|6|8|12|7|7	0.67	0
SARS-CoV2 M	P61289	PSME3	0.383512	0.69	0.67	1|0|1	0|0|0|0|0|0|0|0|0|0|0	6.67	0
SARS-CoV2 M	P61353	RPL27	0.321294	0.69	1	1|1|1	0|3|0|1|0|0|1|0|1|0|1	1.57	0
SARS-CoV2 M	P61513	RPL37A	0.324962	0.55	5	4|5|6	3|5|4|3|5|2|3|3|3|2|2	1.57	0.01
SARS-CoV2 M	P61604	HSPE1	0.374026	0.69	1	1|1|1	0|0|1|1|1|0|0|0|1|0|1	2.2	0
SARS-CoV2 M	P61619	SEC61A1	0.362024	0	4.67	5|4|5	0|0|0|0|0|0|0|0|0|0|0	46.67	1
SARS-CoV2 M	P61803	DAD1	0.544853	0.23	1.33	2|1|1	0|0|0|0|0|0|0|0|0|0|0	13.33	0.32
SARS-CoV2 M	P61923	COPZ1	0.452809	0.69	0.67	1|0|1	0|0|0|0|0|0|0|0|0|0|0	6.67	0
SARS-CoV2 M	P61927	RPL37	0.333492	0.69	1	1|1|1	0|0|1|2|1|1|1|1|1|0|0	1.38	0
SARS-CoV2 M	P61978	HNRNPK	0.31758	0.69	7	8|8|5	13|14|12|15|11|5|7|6|11|4|4	0.75	0
SARS-CoV2 M	P62081	RPS7	0.324851	0.68	13.33	14|13|13	11|19|12|15|19|11|9|14|12|12|11	1.01	0
SARS-CoV2 M	P62195	PSMC5	0.387465	0.05	2.33	4|1|2	0|0|0|1|0|0|0|0|0|0|0	23.33	0.65
SARS-CoV2 M	P62241	RPS8	0.246452	0.6	2	1|4|1	2|5|4|6|3|2|1|0|6|1|3	0.67	0
SARS-CoV2 M	P62244	RPS15A	0.318533	0.58	2.67	3|3|2	2|2|4|4|3|3|1|1|3|1|3	1.09	0
SARS-CoV2 M	P62249	RPS16	0.332056	0.52	15.67	19|15|13	12|8|10|11|7|6|4|6|10|8|6	1.96	0.03
SARS-CoV2 M	P62258	YWHAE	0.323121	0.15	1.67	2|2|1	0|1|1|1|0|0|0|0|2|0|0	3.67	0.39
SARS-CoV2 M	P62263	RPS14	0.328224	0.65	6.67	6|7|7	4|7|6|9|7|3|3|5|7|6|6	1.16	0
SARS-CoV2 M	P62266	RPS23	0.318893	0.67	6.67	6|8|6	9|7|7|8|5|7|6|8|9|6|7	0.93	0
SARS-CoV2 M	P62269	RPS18	0.327648	0.64	9.33	8|9|11	8|6|8|6|4|8|4|6|9|7|8	1.39	0
SARS-CoV2 M	P62273	RPS29	0.330491	0.56	4.33	4|4|5	5|3|5|4|2|1|1|5|4|1|1	1.49	0.01
SARS-CoV2 M	P62277	RPS13	0.314755	0.64	5.33	4|7|5	5|5|5|7|5|5|4|6|7|2|5	1.05	0
SARS-CoV2 M	P62280	RPS11	0.325548	0.64	10.67	13|11|8	8|11|10|9|8|9|6|9|8|2|4	1.4	0
SARS-CoV2 M	P62304	SNRPE	0.345368	0.69	1	1|1|1	0|1|1|2|0|0|0|0|0|0|0	2.75	0
SARS-CoV2 M	P62306	SNRPF	0.320337	0.43	1.33	2|1|1	1|1|1|2|0|0|0|1|1|1|0	1.83	0.12
SARS-CoV2 M	P62318	SNRPD3	0.00948536	0.69	0.33	0|0|1	1|1|1|2|1|1|1|1|1|1|1	0.31	0
SARS-CoV2 M	P62333	PSMC6	0.427311	0.69	0.67	1|1|0	0|0|0|0|0|0|0|0|0|0|0	6.67	0
SARS-CoV2 M	P62424	RPL7A	0.00246552	0.69	0.33	0|1|0	0|7|4|5|0|0|0|0|4|0|0	0.18	0
SARS-CoV2 M	P62633	CNBP	0.319525	0.65	9.67	8|12|9	12|7|15|12|8|7|6|8|10|0|0	1.25	0
SARS-CoV2 M	P62701	RPS4X	0.319843	0.67	10.33	8|10|13	9|11|11|11|14|7|10|13|12|5|7	1.03	0
SARS-CoV2 M	P62750	RPL23A	0.323161	0.67	10	9|8|13	9|7|11|12|13|6|5|10|14|7|6	1.1	0
SARS-CoV2 M	P62753	RPS6	0.198038	0.69	0.67	1|1|0	4|5|4|6|4|2|3|1|3|2|2	0.2	0
SARS-CoV2 M	P62805	H4-16	0.275417	0.67	4	2|7|3	7|16|17|11|1|3|6|0|12|1|2	0.58	0
SARS-CoV2 M	P62826	RAN	0.331779	0.5	4.67	4|6|4	1|5|4|5|2|1|1|1|4|3|3	1.71	0.05
SARS-CoV2 M	P62829	RPL23	0.325626	0.64	11.33	11|9|14	8|10|10|6|11|5|6|11|10|6|6	1.4	0
SARS-CoV2 M	P62841	RPS15	0.205027	0.57	2.33	4|0|3	4|3|4|2|4|2|1|2|2|1|4	0.89	0.01
SARS-CoV2 M	P62847	RPS24	0.323371	0.69	6.33	6|6|7	7|8|8|10|8|6|7|6|7|6|7	0.87	0
SARS-CoV2 M	P62851	RPS25	0.320074	0.62	7.67	6|7|10	9|2|8|8|5|6|2|5|6|7|5	1.34	0
SARS-CoV2 M	P62854	RPS26	0.202512	0.69	0.67	1|0|1	1|2|1|2|2|0|0|2|1|1|3	0.49	0
SARS-CoV2 M	P62857	RPS28	0.324734	0.61	3.67	3|4|4	5|2|3|3|3|3|1|3|5|5|3	1.12	0
SARS-CoV2 M	P62861	FAU	0.325705	0.62	4.33	5|4|4	4|5|4|4|4|3|4|1|3|5|5	1.13	0
SARS-CoV2 M	P62877	RBX1	0.0424292	0.69	0.33	0|0|1	0|0|0|0|0|0|0|0|1|0|0	3.33	0
SARS-CoV2 M	P62888	RPL30	0.322562	0.66	9	11|9|7	10|10|9|9|6|8|7|7|9|4|4	1.19	0
SARS-CoV2 M	P62899	RPL31	0.324199	0.66	5.33	6|5|5	7|5|7|5|7|6|6|5|6|3|5	0.95	0
SARS-CoV2 M	P62906	RPL10A	0.31934	0.69	1	1|1|1	0|2|3|0|0|0|1|0|2|0|0	1.38	0
SARS-CoV2 M	P62910	RPL32	0.00720145	0.56	1	0|0|3	0|4|4|5|1|2|1|1|2|1|1	0.5	0.01
SARS-CoV2 M	P62913	RPL11	0.32694	0.67	9	9|9|9	10|11|12|10|8|4|6|9|9|4|6	1.11	0
SARS-CoV2 M	P62937	PPIA	0.31618	0.68	7	7|5|9	9|11|10|9|10|6|7|9|10|7|8	0.8	0
SARS-CoV2 M	P62942	FKBP1A	0.294709	0.69	1.33	1|2|1	4|6|7|6|5|3|1|3|6|3|3	0.31	0
SARS-CoV2 M	P62979	RPS27A	0.320645	0.61	3.33	3|4|3	6|3|4|4|3|3|2|3|5|0|1	1.08	0
SARS-CoV2 M	P62987	UBA52	0.320633	0.59	3.67	3|4|4	4|3|3|4|4|3|4|4|4|0|0	1.22	0
SARS-CoV2 M	P63098	PPP3R1	0.0265911	0.69	0.33	0|1|0	0|1|0|0|1|0|0|0|0|0|0	1.83	0
SARS-CoV2 M	P63104	YWHAZ	0.352047	0.12	1.67	2|2|1	0|0|1|1|0|0|0|0|1|0|0	6.11	0.52
SARS-CoV2 M	P63151	PPP2R2A	0.0410081	0.69	0.33	1|0|0	0|0|1|0|0|0|0|0|0|0|0	3.33	0
SARS-CoV2 M	P63167	DYNLL1	0.313605	0.44	1.33	1|2|1	1|1|1|1|1|2|1|0|1|0|0	1.63	0.1
SARS-CoV2 M	P63173	RPL38	0.327223	0.69	17.33	16|17|19	19|15|18|19|18|15|12|13|16|16|12	1.1	0
SARS-CoV2 M	P63208	SKP1	0.00716654	0.69	0.33	1|0|0	2|1|1|1|1|0|0|1|0|0|2	0.41	0
SARS-CoV2 M	P63220	RPS21	0.286611	0.48	1.67	3|1|1	2|1|1|3|2|1|0|1|1|2|1	1.22	0.07
SARS-CoV2 M	P63244	RACK1	0.329473	0.33	5.67	8|6|3	6|2|5|7|0|0|0|0|1|4|2	2.31	0.28
SARS-CoV2 M	P63261	ACTG1	0.345256	0.69	1	1|1|1	1|1|0|0|1|0|0|0|1|0|0	2.75	0
SARS-CoV2 M	P68036	UBE2L3	0.0069568	0.69	0.33	1|0|0	1|1|1|1|1|1|1|0|1|1|1	0.37	0
SARS-CoV2 M	P68371	TUBB4B	0.333043	0.69	1	1|1|1	1|0|1|1|1|0|0|1|0|0|0	2.2	0
SARS-CoV2 M	P78346	RPP30	0.290413	0.22	2	1|4|1	0|0|0|1|1|1|1|0|0|0|0	5.5	0.33
SARS-CoV2 M	P78347	GTF2I	0.0121189	0.69	0.33	1|0|0	1|1|3|1|1|0|0|0|1|0|0	0.46	0
SARS-CoV2 M	P78371	CCT2	0.316547	0.02	3.33	4|2|4	0|1|1|2|1|0|0|1|1|0|1	4.58	0.7
SARS-CoV2 M	P78527	PRKDC	0.439099	0	89.33	88|83|97	0|0|3|2|0|0|0|1|0|0|0	163.78	1
SARS-CoV2 M	P78549	NTHL1	0.310141	0.54	2	2|1|3	2|3|3|3|3|1|0|0|3|2|1	1.05	0.02
SARS-CoV2 M	P82094	TMF1	0.0481037	0.69	0.33	0|0|1	0|0|0|0|0|0|0|0|0|0|0	3.33	0
SARS-CoV2 M	P82912	MRPS11	0.336792	0.5	3.33	3|3|4	2|2|3|3|3|3|1|1|2|1|2	1.59	0.04
SARS-CoV2 M	P82921	MRPS21	0.331921	0.44	1.33	2|1|1	1|0|1|1|1|1|0|1|1|0|2	1.63	0.1
SARS-CoV2 M	P83731	RPL24	0.317608	0.69	3.33	3|4|3	3|2|4|7|4|3|4|5|6|4|3	0.81	0
SARS-CoV2 M	P83881	RPL36A	0.327436	0.69	2	2|2|2	2|3|2|2|1|2|3|1|2|2|3	0.96	0
SARS-CoV2 M	P84085	ARF5	0.132434	0.69	0.33	0|1|0	0|0|0|0|0|0|0|0|0|0|0	3.33	0
SARS-CoV2 M	P84090	ERH	0.310562	0.69	1.67	1|2|2	1|2|3|4|3|3|2|2|4|2|1	0.68	0
SARS-CoV2 M	P84098	RPL19	0.182741	0.69	1	0|2|1	1|7|4|5|1|0|2|2|5|3|5	0.31	0
SARS-CoV2 M	P84101	SERF2	0.318835	0.69	1	1|1|1	1|2|1|3|1|3|1|0|1|2|3	0.61	0
SARS-CoV2 M	P84103	SRSF3	0.321958	0.66	6.67	6|6|8	7|7|10|10|6|6|5|9|4|2|7	1	0
SARS-CoV2 M	P98194	ATP2C1	0.437113	0	7.67	9|6|8	0|0|0|0|0|0|0|0|0|0|0	76.67	1
SARS-CoV2 M	Q00059	TFAM	0.295249	0.69	2.33	1|3|3	2|6|4|4|3|2|2|4|4|3|2	0.71	0
SARS-CoV2 M	Q00325	SLC25A3	0.364983	0	17	18|14|19	2|1|1|1|1|0|0|3|1|0|1	17	1
SARS-CoV2 M	Q00587	CDC42EP1	0.0589881	0.23	0.67	2|0|0	0|0|0|0|0|0|0|0|0|0|0	6.67	0.32
SARS-CoV2 M	Q00688	FKBP3	0.314455	0.69	3.33	3|4|3	4|7|2|12|7|3|2|3|2|9|7	0.63	0
SARS-CoV2 M	Q00765	REEP5	0.913089	0	10.67	11|10|11	0|0|0|0|0|0|0|0|0|0|0	106.67	1
SARS-CoV2 M	Q00839	HNRNPU	0.00604295	0.69	1.33	0|4|0	2|22|18|12|3|2|2|0|11|0|0	0.2	0
SARS-CoV2 M	Q01105	SET	0.318423	0.69	1	1|1|1	0|3|4|2|4|1|1|3|0|0|1	0.58	0
SARS-CoV2 M	Q01130	SRSF2	0.306033	0.69	1.67	2|2|1	3|4|2|5|5|3|2|3|4|4|4	0.47	0
SARS-CoV2 M	Q01650	SLC7A5	0.420307	0	3	3|3|3	0|0|0|0|0|0|0|0|0|0|0	30	0.99
SARS-CoV2 M	Q01813	PFKP	0.397399	0	11.33	11|10|13	1|0|0|0|0|0|0|0|0|0|0	113.33	1
SARS-CoV2 M	Q01844	EWSR1	0.320169	0.39	2.33	2|3|2	2|0|0|0|1|3|1|2|2|0|2	1.97	0.18
SARS-CoV2 M	Q02338	BDH1	0.68551	0.69	0.33	1|0|0	0|0|0|0|0|0|0|0|0|0|0	3.33	0
SARS-CoV2 M	Q02543	RPL18A	0.00332677	0.69	0.33	0|1|0	1|3|3|4|0|1|1|0|1|0|1	0.24	0
SARS-CoV2 M	Q02978	SLC25A11	0.380734	0	8.67	10|8|8	0|0|0|1|0|0|0|1|0|0|0	47.67	1
SARS-CoV2 M	Q03252	LMNB2	0.317359	0.36	1.33	1|2|1	0|1|1|1|0|0|0|0|1|0|0	3.67	0.23
SARS-CoV2 M	Q04837	SSBP1	0.325046	0.69	1	1|1|1	0|0|0|0|0|1|2|0|0|2|2	1.57	0
SARS-CoV2 M	Q05519	SRSF11	0.201097	0.69	1.67	3|2|0	6|5|1|4|4|5|4|3|5|3|8	0.38	0
SARS-CoV2 M	Q06830	PRDX1	0.328205	0.55	10.67	15|10|7	8|5|9|9|6|5|5|4|10|7|5	1.61	0.01
SARS-CoV2 M	Q07020	RPL18	0.00840485	0.49	0.67	0|2|0	1|4|2|2|0|0|1|0|2|0|0	0.61	0.05
SARS-CoV2 M	Q07021	C1QBP	0.323775	0.02	4	6|2|4	0|1|1|2|1|0|2|1|0|0|1	4.89	0.7
SARS-CoV2 M	Q07065	CKAP4	0.0101886	0.69	0.33	1|0|0	0|0|0|0|0|0|0|0|0|0|0	3.33	0
SARS-CoV2 M	Q07666	KHDRBS1	0.315509	0.49	1.33	1|1|2	1|2|2|2|1|0|1|1|2|0|0	1.22	0.05
SARS-CoV2 M	Q07889	SOS1	0.0412919	0.69	0.33	1|0|0	0|0|0|0|0|0|0|0|0|0|0	3.33	0
SARS-CoV2 M	Q07955	SRSF1	0.199256	0.69	0.67	1|1|0	1|4|5|15|3|2|0|1|5|3|1	0.18	0
SARS-CoV2 M	Q08170	SRSF4	0.0128253	0.69	0.33	0|1|0	0|1|1|1|0|1|0|1|0|1|0	0.61	0
SARS-CoV2 M	Q08945	SSRP1	0.00671712	0.69	0.33	0|1|0	0|9|5|8|0|0|0|0|2|0|0	0.15	0
SARS-CoV2 M	Q10472	GALNT1	0.309206	0.69	0.67	1|0|1	0|0|0|0|0|0|0|0|0|0|0	6.67	0
SARS-CoV2 M	Q10713	PMPCA	0.99106	0	9.33	11|7|10	0|0|0|0|0|0|0|0|0|0|0	93.33	1
SARS-CoV2 M	Q12797	ASPH	0.281524	0.23	1	2|0|1	0|0|0|0|0|0|0|0|0|0|0	10	0.32
SARS-CoV2 M	Q12834	CDC20	0.00865651	0.69	0.33	1|0|0	3|1|2|0|0|1|0|1|1|1|0	0.37	0
SARS-CoV2 M	Q12893	TMEM115	0.710409	0.23	1	1|2|0	0|0|0|0|0|0|0|0|0|0|0	10	0.32
SARS-CoV2 M	Q12905	ILF2	0.00746656	0.69	0.33	0|1|0	0|3|0|2|0|0|0|0|2|0|0	0.52	0
SARS-CoV2 M	Q12931	TRAP1	0.0465699	0.69	0.33	0|1|0	0|1|0|0|0|0|0|0|0|0|1	1.83	0
SARS-CoV2 M	Q12983	BNIP3	0.49502	0.69	0.67	1|1|0	0|0|0|0|0|0|0|0|0|0|0	6.67	0
SARS-CoV2 M	Q13015	MLLT11	0.685512	0.69	0.33	1|0|0	0|0|0|0|0|0|0|0|0|0|0	3.33	0
SARS-CoV2 M	Q13085	ACACA	0.315351	0.69	40.33	39|32|50	146|147|50|45|48|92|104|34|143|88|105	0.44	0
SARS-CoV2 M	Q13148	TARDBP	0.293132	0.32	1.67	3|1|1	1|2|1|0|0|0|0|0|0|0|0	4.58	0.3
SARS-CoV2 M	Q13200	PSMD2	0.207647	0.38	1	2|1|0	0|0|2|1|1|1|0|0|0|0|0	2.2	0.19
SARS-CoV2 M	Q13232	NME3	0.029192	0.69	0.33	0|1|0	0|0|0|0|0|0|0|0|0|0|0	3.33	0
SARS-CoV2 M	Q13257	MAD2L1	0.241928	0.05	1.67	3|0|2	0|0|0|0|0|0|0|0|0|0|0	16.67	0.65
SARS-CoV2 M	Q13409	DYNC1I2	0.685511	0.19	1	0|3|0	0|0|0|0|0|0|0|0|0|0|0	10	0.33
SARS-CoV2 M	Q13428	TCOF1	0.314552	0.69	2.33	3|2|2	2|3|4|5|4|5|6|4|9|6|8	0.46	0
SARS-CoV2 M	Q13433	SLC39A6	0.886153	0.08	1.67	2|1|2	0|0|0|0|0|0|0|0|0|0|0	16.67	0.64
SARS-CoV2 M	Q13438	OS9	0.0557579	0.69	0.33	1|0|0	0|0|0|0|0|0|0|0|0|0|0	3.33	0
SARS-CoV2 M	Q13442	PDAP1	0.279234	0.69	3	1|4|4	5|6|4|8|6|5|1|2|4|6|4	0.65	0
SARS-CoV2 M	Q13445	TMED1	0.285501	0.69	0.67	1|1|0	0|0|0|0|0|0|0|0|0|0|0	6.67	0
SARS-CoV2 M	Q13505	MTX1	0.750439	0.08	1.67	2|2|1	0|0|0|0|0|0|0|0|0|0|0	16.67	0.64
SARS-CoV2 M	Q13509	TUBB3	0.517297	0.08	1.33	2|0|2	0|0|0|0|0|0|0|0|0|0|0	13.33	0.64
SARS-CoV2 M	Q13523	PRPF4B	0.194339	0.51	1	1|0|2	2|1|0|2|0|1|1|1|1|2|2	0.85	0.04
SARS-CoV2 M	Q13526	PIN1	0.331665	0.69	3	3|3|3	3|4|4|2|3|3|3|1|4|4|4	0.94	0
SARS-CoV2 M	Q13541	EIF4EBP1	0.290223	0.53	1.67	1|1|3	3|2|2|3|3|2|1|1|2|0|0	0.96	0.02
SARS-CoV2 M	Q13542	EIF4EBP2	0.243102	0.69	0.67	0|1|1	0|0|0|0|1|1|0|0|0|1|0	2.44	0
SARS-CoV2 M	Q13547	HDAC1	0.0257181	0.69	0.33	0|1|0	0|0|1|1|1|0|0|0|1|0|1	0.73	0
SARS-CoV2 M	Q13572	ITPK1	0.276806	0.22	1.33	0|1|3	0|0|0|0|0|0|0|0|1|0|1	7.33	0.33
SARS-CoV2 M	Q13573	SNW1	0.1835	0.57	1	1|2|0	1|3|0|5|3|0|0|1|3|2|1	0.58	0.01
SARS-CoV2 M	Q13724	MOGS	0.00390378	0.69	0.33	1|0|0	0|0|0|0|0|0|0|0|0|0|0	3.33	0
SARS-CoV2 M	Q13885	TUBB2A	0.360291	0.69	1	1|1|1	0|0|0|0|0|0|0|0|0|0|0	10	0
SARS-CoV2 M	Q14061	COX17	0.282103	0.61	3	3|1|5	5|2|5|4|5|1|3|3|5|2|3	0.87	0
SARS-CoV2 M	Q14103	HNRNPD	0.169596	0.59	1.33	0|3|1	1|4|8|7|1|0|1|0|4|0|1	0.54	0
SARS-CoV2 M	Q14157	UBAP2L	0.0118522	0.23	0.67	0|2|0	0|0|0|0|1|0|0|0|0|0|0	6.67	0.32
SARS-CoV2 M	Q14165	MLEC	0.491474	0	3.33	4|3|3	0|0|0|0|0|0|0|0|0|0|0	33.33	1
SARS-CoV2 M	Q14204	DYNC1H1	0.567088	0	26.33	25|29|25	0|0|0|0|2|0|0|0|0|0|0	144.83	1
SARS-CoV2 M	Q14247	CTTN	0.201995	0.69	0.67	1|0|1	4|3|5|1|0|2|0|0|3|3|3	0.31	0
SARS-CoV2 M	Q14257	RCN2	0.423542	0	15.67	15|15|17	0|0|0|0|0|0|0|1|1|0|0	86.17	1
SARS-CoV2 M	Q14318	FKBP8	0.279976	0.69	0.67	0|1|1	0|0|0|0|0|0|0|0|0|0|0	6.67	0
SARS-CoV2 M	Q14331	FRG1	0.327102	0.67	11.33	11|10|13	8|12|11|12|14|10|10|10|12|3|5	1.17	0
SARS-CoV2 M	Q14410	GK2	0.993768	0.69	1	1|1|1	0|0|0|0|0|0|0|0|0|0|0	10	0
SARS-CoV2 M	Q14444	CAPRIN1	0.326809	0.69	1	1|1|1	1|1|0|1|2|2|0|0|2|0|1	1.1	0
SARS-CoV2 M	Q14498	RBM39	0.32748	0.69	26	24|24|30	25|25|23|25|27|23|25|24|24|15|23	1.1	0
SARS-CoV2 M	Q14554	PDIA5	0.0106365	0.56	0.67	0|2|0	1|1|2|5|1|1|0|1|2|3|1	0.41	0.01
SARS-CoV2 M	Q14657	LAGE3	0.45915	0.69	0.67	1|0|1	0|0|0|0|0|0|0|0|0|0|0	6.67	0
SARS-CoV2 M	Q14677	CLINT1	0.196889	0.36	1	1|2|0	0|1|0|0|0|1|0|1|0|1|0	2.75	0.23
SARS-CoV2 M	Q14697	GANAB	0.373458	0	11	11|12|10	0|0|0|0|0|0|0|0|0|0|0	110	1
SARS-CoV2 M	Q14739	LBR	0.230823	0.23	1	2|1|0	0|0|0|0|0|0|0|0|0|0|0	10	0.32
SARS-CoV2 M	Q14807	KIF22	0.201138	0.69	0.67	0|1|1	6|4|4|3|4|4|3|3|4|3|4	0.17	0
SARS-CoV2 M	Q14964	RAB39A	0.685511	0.23	0.67	2|0|0	0|0|0|0|0|0|0|0|0|0|0	6.67	0.32
SARS-CoV2 M	Q14974	KPNB1	0.401855	0	11	15|11|7	0|0|0|0|0|0|0|0|0|0|0	110	1
SARS-CoV2 M	Q14978	NOLC1	0.298739	0.69	4	2|5|5	7|7|8|9|6|5|5|5|7|5|8	0.61	0
SARS-CoV2 M	Q14CZ7	FASTKD3	0.303183	0.69	0.67	1|0|1	0|0|0|0|0|0|0|0|0|0|0	6.67	0
SARS-CoV2 M	Q15004	PCLAF	0.411047	0.69	0.67	1|0|1	0|0|0|0|0|0|0|0|0|0|0	6.67	0
SARS-CoV2 M	Q15041	ARL6IP1	0.704988	0.08	1.67	2|1|2	0|0|0|0|0|0|0|0|0|0|0	16.67	0.64
SARS-CoV2 M	Q15043	SLC39A14	0.537571	0	5	7|4|4	0|0|0|0|0|0|0|0|0|0|0	50	1
SARS-CoV2 M	Q15054	POLD3	0.322051	0.69	0.67	0|1|1	0|0|0|0|0|0|0|0|0|0|0	6.67	0
SARS-CoV2 M	Q15070	OXA1L	0.3044	0.19	1.33	3|1|0	0|0|0|0|0|0|0|0|0|0|0	13.33	0.33
SARS-CoV2 M	Q15084	PDIA6	0.312752	0.69	3.33	4|4|2	7|6|7|6|7|3|4|4|2|4|5	0.67	0
SARS-CoV2 M	Q15120	PDK3	0.620506	0.23	1.33	2|1|1	0|0|0|0|0|0|0|0|0|0|0	13.33	0.32
SARS-CoV2 M	Q15125	EBP	0.56783	0	3.67	4|4|3	0|0|0|0|0|0|0|0|0|0|0	36.67	1
SARS-CoV2 M	Q15165	PON2	0.327594	0.23	1.33	1|1|2	0|0|0|0|0|0|0|0|0|0|0	13.33	0.32
SARS-CoV2 M	Q15181	PPA1	0.214226	0.69	0.67	1|0|1	1|1|0|1|2|1|2|1|1|0|0	0.73	0
SARS-CoV2 M	Q15233	NONO	0.271864	0.63	3	1|5|3	4|5|9|7|2|1|2|1|4|5|6	0.72	0
SARS-CoV2 M	Q15293	RCN1	0.567228	0	11.67	14|10|11	0|0|0|0|0|0|0|0|0|0|0	116.67	1
SARS-CoV2 M	Q15363	TMED2	0.381149	0.08	1.67	2|2|1	0|0|0|0|0|0|0|0|0|0|0	16.67	0.64
SARS-CoV2 M	Q15365	PCBP1	0.313601	0.68	8.67	7|7|12	13|13|10|12|13|10|11|11|9|9|5	0.82	0
SARS-CoV2 M	Q15366	PCBP2	0.325098	0.64	7	7|8|6	6|7|7|7|6|5|6|4|7|3|6	1.2	0
SARS-CoV2 M	Q15386	UBE3C	0.265923	0.08	1.33	2|2|0	0|0|0|0|0|0|0|0|0|0|0	13.33	0.64
SARS-CoV2 M	Q15392	DHCR24	0.424422	0	3.33	4|4|2	0|0|0|0|0|0|0|0|0|0|0	33.33	0.99
SARS-CoV2 M	Q15417	CNN3	0.294945	0.69	2	1|2|3	6|2|4|4|4|3|2|4|5|3|3	0.55	0
SARS-CoV2 M	Q15629	TRAM1	0.07613	0	6	5|5|8	0|0|0|0|0|0|0|0|0|0|0	60	1
SARS-CoV2 M	Q15637	SF1	0.323181	0.67	9.33	9|11|8	11|9|6|7|13|8|5|7|15|7|7	1.08	0
SARS-CoV2 M	Q15645	TRIP13	0.441248	0	12	14|11|11	0|0|0|0|0|0|0|0|0|0|0	120	1
SARS-CoV2 M	Q15651	HMGN3	0.0226671	0.69	0.33	0|0|1	0|0|0|0|0|1|0|0|0|0|0	3.33	0
SARS-CoV2 M	Q15758	SLC1A5	0.439976	0	9.67	9|10|10	0|0|0|0|0|0|0|0|0|0|0	96.67	1
SARS-CoV2 M	Q15773	MLF2	0.663123	0	3	3|3|3	0|0|0|0|0|0|0|0|0|0|0	30	0.99
SARS-CoV2 M	Q15800	MSMO1	0.980772	0.23	1.33	2|1|1	0|0|0|0|0|0|0|0|0|0|0	13.33	0.32
SARS-CoV2 M	Q16186	ADRM1	0.320588	0.69	0.67	0|1|1	0|0|0|0|0|0|0|0|0|0|0	6.67	0
SARS-CoV2 M	Q16527	CSRP2	0.326916	0.67	9	9|8|10	9|10|11|11|8|9|5|9|13|2|2	1.11	0
SARS-CoV2 M	Q16531	DDB1	0.234302	0.23	1	0|1|2	0|0|0|0|0|0|0|0|0|0|0	10	0.32
SARS-CoV2 M	Q16576	RBBP7	0.0432483	0.69	0.33	0|1|0	0|0|0|0|0|0|0|0|0|0|0	3.33	0
SARS-CoV2 M	Q16630	CPSF6	0.292214	0.53	4.33	2|7|4	5|5|3|6|2|4|0|3|1|4|4	1.29	0.02
SARS-CoV2 M	Q16698	DECR1	0.265146	0.69	0.33	0|1|0	0|0|0|0|0|0|0|0|0|0|0	3.33	0
SARS-CoV2 M	Q16718	NDUFA5	0.372669	0.01	2	2|2|2	0|0|0|0|0|0|0|0|0|0|0	20	0.96
SARS-CoV2 M	Q16795	NDUFA9	0.0660532	0.23	0.67	2|0|0	0|0|0|0|0|0|0|0|0|0|0	6.67	0.32
SARS-CoV2 M	Q16891	IMMT	0.352045	0	10.33	8|12|11	0|0|0|0|0|0|0|0|0|0|0	103.33	1
SARS-CoV2 M	Q2TAA5	ALG11	0.230317	0.69	0.67	1|1|0	0|0|0|0|0|0|0|0|0|0|0	6.67	0
SARS-CoV2 M	Q3B726	TWISTNB	0.195006	0.46	1	0|2|1	0|0|1|2|1|1|0|1|2|0|2	1.1	0.08
SARS-CoV2 M	Q3MHD2	LSM12	0.209772	0.69	0.67	0|1|1	1|0|1|1|1|1|0|1|1|0|1	0.92	0
SARS-CoV2 M	Q3SXY8	ARL13B	0.113512	0.69	0.33	0|0|1	0|0|0|0|0|0|0|0|0|0|0	3.33	0
SARS-CoV2 M	Q3SY69	ALDH1L2	0.394831	0.08	1.67	1|2|2	0|0|0|0|0|0|0|0|0|0|0	16.67	0.64
SARS-CoV2 M	Q3ZCM7	TUBB8	0.331408	0.08	3.67	4|3|4	1|1|2|2|3|0|0|0|2|0|0	3.67	0.65
SARS-CoV2 M	Q3ZCQ8	TIMM50	0.371121	0	11	13|8|12	0|0|0|0|0|0|0|1|0|1|0	60.5	1
SARS-CoV2 M	Q4KMP7	TBC1D10B	0.00578113	0.69	0.33	0|0|1	1|0|0|1|1|0|1|0|0|1|1	0.61	0
SARS-CoV2 M	Q4KMQ2	ANO6	0.993904	0	9.33	10|9|9	0|0|0|0|0|0|0|0|0|0|0	93.33	1
SARS-CoV2 M	Q53GQ0	HSD17B12	0.446056	0	13	16|12|11	0|0|0|0|0|0|0|0|0|0|0	130	1
SARS-CoV2 M	Q53H12	AGK	0.343176	0	6	9|3|6	0|0|0|0|0|0|0|0|0|0|0	60	1
SARS-CoV2 M	Q53HI1	UNC50	0.664013	0.01	2	2|2|2	0|0|0|0|0|0|0|0|0|0|0	20	0.96
SARS-CoV2 M	Q53R41	FASTKD1	0.622958	0	7.33	9|4|9	0|0|0|0|0|0|0|0|0|0|0	73.33	1
SARS-CoV2 M	Q58FF8	HSP90AB2P	0.615083	0.69	1	1|1|1	0|0|0|0|0|0|0|0|0|0|0	10	0
SARS-CoV2 M	Q5BJD5	TMEM41B	0.528822	0.01	2	2|2|2	0|0|0|0|0|0|0|0|0|0|0	20	0.96
SARS-CoV2 M	Q5BJH7	YIF1B	0.59795	0	3.33	4|3|3	0|0|0|0|0|0|0|0|0|0|0	33.33	1
SARS-CoV2 M	Q5BKY9	FAM133B	0.304729	0.69	1.67	2|2|1	1|5|4|5|6|4|6|6|2|0|4	0.43	0
SARS-CoV2 M	Q5C9Z4	NOM1	0.0954455	0.23	0.67	2|0|0	0|0|0|0|0|0|0|0|0|0|0	6.67	0.32
SARS-CoV2 M	Q5H8A4	PIGG	0.558367	0	2.33	3|2|2	0|0|0|0|0|0|0|0|0|0|0	23.33	0.97
SARS-CoV2 M	Q5H9R7	PPP6R3	0.709868	0.23	1	2|0|1	0|0|0|0|0|0|0|0|0|0|0	10	0.32
SARS-CoV2 M	Q5HYJ1	TECRL	0.0151273	0.69	0.33	0|0|1	0|2|0|0|0|1|1|0|0|0|1	0.73	0
SARS-CoV2 M	Q5HYJ3	FAM76B	0.311431	0.52	1.33	1|2|1	1|1|2|1|2|1|0|2|3|1|0	1.05	0.03
SARS-CoV2 M	Q5HYK3	COQ5	0.877063	0.05	1.67	3|2|0	0|0|0|0|0|0|0|0|0|0|0	16.67	0.65
SARS-CoV2 M	Q5JPH6	EARS2	0.490723	0	5.67	7|4|6	0|0|0|0|0|0|0|0|0|0|0	56.67	1
SARS-CoV2 M	Q5JRX3	PITRM1	0.952308	0	7	8|4|9	0|0|0|0|0|0|0|0|0|0|0	70	1
SARS-CoV2 M	Q5JTJ3	COA6	0.101126	0.69	0.33	0|1|0	0|0|0|0|0|1|0|0|0|0|1	1.83	0
SARS-CoV2 M	Q5JVF3	PCID2	0.18934	0.69	0.33	0|1|0	0|0|0|0|0|0|0|0|0|0|0	3.33	0
SARS-CoV2 M	Q5SQN1	SNAP47	0.211697	0.69	0.33	1|0|0	0|0|0|0|0|0|0|0|0|0|0	3.33	0
SARS-CoV2 M	Q5SRE5	NUP188	0.619102	0	4.67	5|4|5	0|0|0|0|0|0|0|0|0|0|0	46.67	1
SARS-CoV2 M	Q5SWX8	ODR4	0.570612	0.69	0.67	0|1|1	0|0|0|0|0|0|0|0|0|0|0	6.67	0
SARS-CoV2 M	Q5T160	RARS2	0.56974	0	7	8|9|4	0|0|0|0|0|0|0|0|0|0|0	70	1
SARS-CoV2 M	Q5T440	IBA57	0.315616	0.69	4	4|5|3	10|7|4|5|4|4|2|3|5|5|6	0.8	0
SARS-CoV2 M	Q5T8P6	RBM26	0.197291	0.69	0.33	0|1|0	0|0|0|0|0|0|0|0|0|0|0	3.33	0
SARS-CoV2 M	Q5T9A4	ATAD3B	0.0069855	0.19	1	0|0|3	0|0|0|0|0|0|0|0|0|0|0	10	0.33
SARS-CoV2 M	Q5T9L3	WLS	0.626983	0	4	7|3|2	0|0|0|0|0|0|0|0|0|0|0	40	0.99
SARS-CoV2 M	Q5TGZ0	MICOS10	0.0929012	0.69	0.33	1|0|0	0|0|0|0|0|0|0|0|0|0|0	3.33	0
SARS-CoV2 M	Q5VTL8	PRPF38B	0.325383	0.68	11	10|11|12	10|11|10|12|13|12|11|12|13|4|10	1.03	0
SARS-CoV2 M	Q5VV42	CDKAL1	0.598869	0	3.33	3|4|3	0|0|0|0|0|0|0|0|0|0|0	33.33	1
SARS-CoV2 M	Q5VW38	GPR107	0.397396	0.69	0.67	1|1|0	0|0|0|0|0|0|0|0|0|0|0	6.67	0
SARS-CoV2 M	Q5VWZ2	LYPLAL1	0.346228	0.23	1.33	1|1|2	0|0|0|0|0|0|0|0|0|0|0	13.33	0.32
SARS-CoV2 M	Q5XKP0	MICOS13	0.581748	0.19	1.67	1|1|3	0|0|0|0|0|0|0|0|0|0|0	16.67	0.33
SARS-CoV2 M	Q66PJ3	ARL6IP4	0.304103	0.69	1.67	1|2|2	2|3|9|5|4|4|2|2|4|2|2	0.47	0
SARS-CoV2 M	Q68DH5	LMBRD2	0.244943	0.69	0.33	1|0|0	0|0|0|0|0|0|0|0|0|0|0	3.33	0
SARS-CoV2 M	Q6FI81	CIAPIN1	0.00494441	0.69	0.33	0|0|1	2|1|2|3|0|1|1|2|1|2|1	0.23	0
SARS-CoV2 M	Q6IAN0	DHRS7B	0.0351385	0	4.33	4|4|5	0|0|0|0|0|0|0|0|0|0|0	43.33	1
SARS-CoV2 M	Q6IQ49	SDE2	0.208165	0.69	0.67	0|1|1	2|1|2|1|0|1|1|0|3|2|1	0.52	0
SARS-CoV2 M	Q6L8Q7	PDE12	0.0297397	0.69	0.33	0|0|1	0|0|1|0|0|0|0|0|0|0|0	3.33	0
SARS-CoV2 M	Q6NS38	ALKBH2	0.0809352	0.34	0.67	2|0|0	0|0|1|0|0|1|0|0|0|0|1	2.44	0.26
SARS-CoV2 M	Q6NTE8	MRNIP	0.0215801	0.69	0.33	0|1|0	1|0|1|1|0|2|0|1|2|0|1	0.41	0
SARS-CoV2 M	Q6NTF9	RHBDD2	0.36619	0.19	1.67	3|1|1	0|0|0|0|0|0|0|0|0|0|0	16.67	0.33
SARS-CoV2 M	Q6NUQ1	RINT1	0.68551	0.69	0.33	1|0|0	0|0|0|0|0|0|0|0|0|0|0	3.33	0
SARS-CoV2 M	Q6NXE6	ARMC6	0.674159	0.08	1.67	2|1|2	0|0|0|0|0|0|0|0|0|0|0	16.67	0.64
SARS-CoV2 M	Q6NXT4	SLC30A6	0.107781	0.69	0.33	1|0|0	0|0|0|0|0|0|0|0|0|0|0	3.33	0
SARS-CoV2 M	Q6NZ67	MZT2B	0.685511	0.69	0.33	1|0|0	0|0|0|0|0|0|0|0|0|0|0	3.33	0
SARS-CoV2 M	Q6P087	RPUSD3	0.32351	0.46	4.67	7|4|3	2|1|7|4|2|1|2|2|6|3|1	1.66	0.08
SARS-CoV2 M	Q6P1L8	MRPL14	0.324664	0.65	6	5|7|6	5|5|7|5|6|6|6|6|6|7|5	1.03	0
SARS-CoV2 M	Q6P1M0	SLC27A4	0.0542698	0.69	0.33	1|0|0	0|0|0|0|0|0|0|0|0|0|0	3.33	0
SARS-CoV2 M	Q6P1Q0	LETMD1	0.54973	0	3.67	5|3|3	0|0|0|0|0|0|0|0|0|0|0	36.67	1
SARS-CoV2 M	Q6P1Q9	METTL2B	0.0406338	0.69	0.33	0|0|1	0|0|1|0|0|0|0|0|0|0|0	3.33	0
SARS-CoV2 M	Q6P3X3	TTC27	0.362292	0.19	1.67	1|1|3	0|0|0|0|0|0|0|0|0|0|0	16.67	0.33
SARS-CoV2 M	Q6P4A7	SFXN4	0.431608	0	5.33	5|6|5	0|0|0|0|0|0|0|0|0|0|0	53.33	1
SARS-CoV2 M	Q6P5R6	RPL22L1	0.319752	0.6	2.33	2|2|3	4|3|2|2|4|2|1|3|3|2|2	0.92	0
SARS-CoV2 M	Q6PI48	DARS2	0.483414	0.23	1.33	1|1|2	0|0|0|0|0|0|0|0|0|0|0	13.33	0.32
SARS-CoV2 M	Q6PML9	SLC30A9	0.886323	0.05	2	3|1|2	0|0|0|0|0|0|0|0|0|0|0	20	0.65
SARS-CoV2 M	Q6UB35	MTHFD1L	0.215987	0.69	0.67	1|0|1	2|0|1|0|0|0|0|1|1|0|0	1.47	0
SARS-CoV2 M	Q6UN15	FIP1L1	0.0192662	0.69	0.33	0|0|1	1|1|1|1|0|1|0|0|0|1|1	0.52	0
SARS-CoV2 M	Q6UW68	TMEM205	0.297974	0.69	0.67	1|0|1	0|0|0|0|0|0|0|0|0|0|0	6.67	0
SARS-CoV2 M	Q6UX65	DRAM2	0.497267	0.69	0.67	1|1|0	0|0|0|0|0|0|0|0|0|0|0	6.67	0
SARS-CoV2 M	Q6Y1H2	HACD2	0.53396	0.08	1.67	1|2|2	0|0|0|0|0|0|0|0|0|0|0	16.67	0.64
SARS-CoV2 M	Q6ZUT1	NKAPD1	0.321528	0.69	1	1|1|1	3|4|2|3|1|0|2|3|4|2|4	0.39	0
SARS-CoV2 M	Q70Z53	FRA10AC1	0.205552	0.69	1.33	0|2|2	3|1|2|5|4|3|1|2|3|1|2	0.54	0
SARS-CoV2 M	Q71UM5	RPS27L	0.336802	0.45	3	3|3|3	1|2|3|2|3|2|1|1|3|0|0	1.83	0.09
SARS-CoV2 M	Q7L014	DDX46	0.27209	0.69	6.33	2|7|10	14|16|20|25|21|14|9|20|19|14|13	0.38	0
SARS-CoV2 M	Q7L1Q6	BZW1	0.107593	0.69	0.33	0|1|0	0|0|0|0|0|0|0|0|0|0|0	3.33	0
SARS-CoV2 M	Q7L3T8	PARS2	0.213484	0.49	1	2|0|1	1|1|4|2|0|0|0|2|0|1|1	0.92	0.05
SARS-CoV2 M	Q7L4I2	RSRC2	0.288484	0.69	2	1|3|2	4|4|6|6|5|4|4|4|5|3|6	0.43	0
SARS-CoV2 M	Q7L5N7	LPCAT2	0.11116	0.69	0.33	0|0|1	0|0|0|0|0|0|0|0|0|0|0	3.33	0
SARS-CoV2 M	Q7L8L6	FASTKD5	0.758366	0	7.33	9|7|6	0|0|0|0|0|0|0|0|0|0|0	73.33	1
SARS-CoV2 M	Q7LGA3	HS2ST1	0.269566	0.08	1.33	2|2|0	0|0|0|0|0|0|0|0|0|0|0	13.33	0.64
SARS-CoV2 M	Q7Z3U7	MON2	0.68551	0.23	0.67	0|0|2	0|0|0|0|0|0|0|0|0|0|0	6.67	0.32
SARS-CoV2 M	Q7Z417	NUFIP2	0.207865	0.69	0.67	0|1|1	2|1|1|0|1|0|2|1|1|2|1	0.61	0
SARS-CoV2 M	Q7Z4Q2	HEATR3	0.278594	0.23	1	0|2|1	0|0|0|0|0|0|0|0|0|0|0	10	0.32
SARS-CoV2 M	Q7Z4R8	C6orf120	0.662186	0.23	1.33	1|2|1	0|0|0|0|0|0|0|0|0|0|0	13.33	0.32
SARS-CoV2 M	Q7Z5L9	IRF2BP2	0.323671	0.66	6	6|5|7	7|8|6|4|2|6|7|7|12|6|5	0.94	0
SARS-CoV2 M	Q7Z769	SLC35E3	0.497267	0.69	0.67	1|1|0	0|0|0|0|0|0|0|0|0|0|0	6.67	0
SARS-CoV2 M	Q7Z7B1	PIGW	0.261894	0.69	0.33	0|1|0	0|0|0|0|0|0|0|0|0|0|0	3.33	0
SARS-CoV2 M	Q7Z7K0	CMC1	0.202741	0.69	0.67	1|1|0	4|1|1|0|1|3|2|0|2|2|1	0.43	0
SARS-CoV2 M	Q86SX6	GLRX5	0.227488	0.69	0.67	1|0|1	1|0|2|2|0|0|0|0|0|0|1	1.22	0
SARS-CoV2 M	Q86TW2	ADCK1	0.84943	0.19	1.33	3|1|0	0|0|0|0|0|0|0|0|0|0|0	13.33	0.33
SARS-CoV2 M	Q86U28	ISCA2	0.0189999	0.69	0.33	0|0|1	3|0|0|0|0|0|0|0|1|2|1	0.52	0
SARS-CoV2 M	Q86U90	YRDC	0.304154	0.69	1.33	1|1|2	4|3|5|5|3|0|0|1|5|1|1	0.52	0
SARS-CoV2 M	Q86UE4	MTDH	0.0422994	0.69	0.33	0|1|0	0|0|0|0|0|1|0|0|0|0|0	3.33	0
SARS-CoV2 M	Q86UK7	ZNF598	0.00522959	0.69	0.33	0|0|1	2|0|0|1|0|0|0|0|0|1|0	0.92	0
SARS-CoV2 M	Q86UL3	GPAT4	0.48499	0.01	2	2|2|2	0|0|0|0|0|0|0|0|0|0|0	20	0.96
SARS-CoV2 M	Q86UP2	KTN1	0.0102125	0.69	0.33	1|0|0	0|0|1|0|0|0|1|0|0|0|0	1.83	0
SARS-CoV2 M	Q86V81	ALYREF	0.298367	0.56	2	1|3|2	1|8|3|3|1|0|2|0|4|1|1	0.92	0.01
SARS-CoV2 M	Q86VI4	LAPTM4B	0.68551	0.69	0.33	1|0|0	0|0|0|0|0|0|0|0|0|0|0	3.33	0
SARS-CoV2 M	Q86VP6	CAND1	0.559284	0	16	12|19|17	0|0|0|0|0|0|0|0|0|0|0	160	1
SARS-CoV2 M	Q86VR2	RETREG3	0.0693407	0.69	0.33	1|0|0	0|0|0|0|0|0|0|0|0|0|0	3.33	0
SARS-CoV2 M	Q86WX3	RPS19BP1	0.33627	0.41	2.67	3|3|2	2|0|1|2|0|2|3|2|0|2|1	1.96	0.15
SARS-CoV2 M	Q86X95	CIR1	0.00434373	0.69	0.33	1|0|0	2|1|2|0|1|2|3|2|1|2|2	0.2	0
SARS-CoV2 M	Q86Y07	VRK2	0.66877	0.23	1.33	1|2|1	0|0|0|0|0|0|0|0|0|0|0	13.33	0.32
SARS-CoV2 M	Q86Y39	NDUFA11	0.499654	0.05	2	3|1|2	0|0|0|0|0|0|0|0|0|0|0	20	0.65
SARS-CoV2 M	Q86Y56	DNAAF5	0.529973	0	4.33	5|4|4	0|0|0|0|0|0|0|0|0|0|0	43.33	1
SARS-CoV2 M	Q86Y79	PTRH1	0.314315	0.47	1.33	1|1|2	3|2|0|1|2|0|0|0|0|1|1	1.47	0.08
SARS-CoV2 M	Q8IUX1	TMEM126B	0.185571	0.69	0.33	1|0|0	0|0|0|0|0|0|0|0|0|0|0	3.33	0
SARS-CoV2 M	Q8IWQ3	BRSK2	0.203865	0.69	0.67	0|1|1	1|3|2|1|2|2|3|1|3|2|2	0.33	0
SARS-CoV2 M	Q8IWS0	PHF6	0.321412	0.68	16.33	18|12|19	14|16|20|22|22|16|10|18|14|9|5	1.08	0
SARS-CoV2 M	Q8IWX8	CHERP	0.321709	0.69	9	9|9|9	22|20|10|9|12|8|13|9|20|11|10	0.69	0
SARS-CoV2 M	Q8IXB1	DNAJC10	0.248764	0.69	2	1|1|4	13|12|14|19|12|9|8|6|15|10|10	0.17	0
SARS-CoV2 M	Q8IXI1	RHOT2	0.689955	0	3.67	4|3|4	0|0|0|0|0|0|0|0|0|0|0	36.67	1
SARS-CoV2 M	Q8IXI2	RHOT1	0.290427	0.23	0.67	2|0|0	0|0|0|0|0|0|0|0|0|0|0	6.67	0.32
SARS-CoV2 M	Q8IXU6	SLC35F2	0.094844	0.69	0.33	1|0|0	0|0|0|0|0|0|0|0|0|0|0	3.33	0
SARS-CoV2 M	Q8IY67	RAVER1	0.205585	0.54	1.67	0|2|3	3|3|2|1|1|3|2|2|4|0|0	0.87	0.02
SARS-CoV2 M	Q8IYB3	SRRM1	0.00366499	0.69	0.33	1|0|0	1|1|2|4|2|1|0|0|1|0|3	0.24	0
SARS-CoV2 M	Q8IYB5	SMAP1	0.0057581	0.69	0.33	0|0|1	1|1|4|4|1|1|1|1|1|1|1	0.22	0
SARS-CoV2 M	Q8IYN2	TCEAL8	0.0436658	0.69	0.33	0|1|0	0|0|0|0|0|0|0|1|1|0|0	1.83	0
SARS-CoV2 M	Q8IZQ5	SELENOH	0.00338739	0.69	0.33	0|0|1	3|2|3|4|4|0|3|1|1|4|2	0.14	0
SARS-CoV2 M	Q8IZV5	RDH10	0.170605	0.23	0.67	0|0|2	0|0|0|0|0|0|0|0|0|0|0	6.67	0.32
SARS-CoV2 M	Q8N0T1	RBIS	0.0200387	0.34	0.67	0|0|2	0|1|0|1|1|0|0|0|0|0|0	2.44	0.26
SARS-CoV2 M	Q8N0U8	VKORC1L1	0.615215	0	4	5|3|4	0|0|0|0|0|0|0|0|0|0|0	40	1
SARS-CoV2 M	Q8N1F7	NUP93	0.422138	0	20	18|20|22	0|0|0|1|0|0|0|0|0|0|0	200	1
SARS-CoV2 M	Q8N1G4	LRRC47	0.293934	0.69	3.33	2|5|3	10|6|5|12|8|10|0|2|6|8|6	0.5	0
SARS-CoV2 M	Q8N4V1	MMGT1	0.365923	0.05	2	1|3|2	0|0|0|0|0|0|0|0|0|0|0	20	0.65
SARS-CoV2 M	Q8N5F7	NKAP	0.323251	0.69	2	2|2|2	2|3|2|5|3|3|3|4|4|1|3	0.67	0
SARS-CoV2 M	Q8N5K1	CISD2	0.240981	0.69	0.67	1|1|0	0|0|0|0|0|0|0|0|0|0|0	6.67	0
SARS-CoV2 M	Q8N5M9	JAGN1	0.0757334	0.69	0.33	1|0|0	0|0|0|0|0|0|0|0|0|0|0	3.33	0
SARS-CoV2 M	Q8N684	CPSF7	0.215582	0.54	1.33	0|2|2	2|3|0|3|2|2|0|1|1|2|2	0.81	0.02
SARS-CoV2 M	Q8N6L1	KRTCAP2	0.481205	0.23	1.33	2|1|1	0|0|0|0|0|0|0|0|0|0|0	13.33	0.32
SARS-CoV2 M	Q8N6M3	FITM2	0.129403	0.69	0.33	0|0|1	0|0|0|0|0|0|0|0|0|0|0	3.33	0
SARS-CoV2 M	Q8N6N3	C1orf52	0.0495384	0.69	0.33	0|1|0	1|0|0|0|0|0|0|0|0|1|0	1.83	0
SARS-CoV2 M	Q8N6S5	ARL6IP6	0.0330237	0.69	0.33	0|0|1	0|0|0|0|0|0|0|0|0|0|0	3.33	0
SARS-CoV2 M	Q8N726	CDKN2A	0.265891	0.69	0.67	1|1|0	0|0|0|0|0|0|0|1|0|0|0	6.67	0
SARS-CoV2 M	Q8N8R3	SLC25A29	0.499541	0.69	1	1|1|1	0|0|0|0|0|0|0|0|0|0|0	10	0
SARS-CoV2 M	Q8N9Q2	SREK1IP1	0.326939	0.66	12	13|10|13	7|11|10|13|9|10|10|11|10|2|4	1.36	0
SARS-CoV2 M	Q8NAV1	PRPF38A	0.297353	0.61	2	1|2|3	3|3|1|4|3|3|3|2|4|1|2	0.76	0
SARS-CoV2 M	Q8NB90	SPATA5	0.68551	0.23	0.67	2|0|0	0|0|0|0|0|0|0|0|0|0|0	6.67	0.32
SARS-CoV2 M	Q8NBM4	UBAC2	0.39554	0	2.67	3|3|2	0|0|0|0|0|0|0|0|0|0|0	26.67	0.98
SARS-CoV2 M	Q8NBN7	RDH13	0.612103	0.69	0.67	0|1|1	0|0|0|0|0|0|0|0|0|0|0	6.67	0
SARS-CoV2 M	Q8NBQ5	HSD17B11	0.279459	0.69	0.67	1|1|0	0|0|0|0|0|0|0|0|0|0|0	6.67	0
SARS-CoV2 M	Q8NBS9	TXNDC5	0.301019	0.65	3.33	3|5|2	9|3|8|5|5|5|1|5|7|2|2	0.71	0
SARS-CoV2 M	Q8NBU5	ATAD1	0.247734	0.19	1.33	3|1|0	0|0|0|0|0|0|0|0|0|0|0	13.33	0.33
SARS-CoV2 M	Q8NC51	SERBP1	0.320682	0.63	9.33	13|7|8	11|9|11|10|4|5|5|6|5|6|8	1.28	0
SARS-CoV2 M	Q8ND56	LSM14A	0.308668	0.46	2	1|2|3	2|2|3|1|3|1|2|1|0|0|0	1.47	0.09
SARS-CoV2 M	Q8NDC0	MAPK1IP1L	0.0321533	0.69	0.33	0|1|0	1|0|0|0|1|0|0|0|1|0|0	1.22	0
SARS-CoV2 M	Q8NDD1	C1orf131	0.324345	0.55	2.67	4|2|2	2|5|4|4|1|1|2|2|1|2|1	1.17	0.01
SARS-CoV2 M	Q8NE71	ABCF1	0.285261	0.69	7.33	3|11|8	17|15|13|16|15|14|9|9|14|9|12	0.56	0
SARS-CoV2 M	Q8NEW0	SLC30A7	0.766972	0	4.67	5|4|5	0|0|0|0|0|0|0|0|0|0|0	46.67	1
SARS-CoV2 M	Q8NEZ5	FBXO22	0.200598	0.69	0.67	1|1|0	3|3|4|4|4|2|2|3|2|3|6	0.2	0
SARS-CoV2 M	Q8NF37	LPCAT1	0.41268	0.03	3.67	6|1|4	0|0|0|0|0|0|0|0|0|0|0	36.67	0.67
SARS-CoV2 M	Q8NFQ8	TOR1AIP2	0.402179	0.69	1	1|1|1	0|0|0|0|0|0|0|0|0|0|0	10	0
SARS-CoV2 M	Q8NFW8	CMAS	0.0168373	0.69	0.33	1|0|0	0|0|1|2|2|0|0|0|1|1|2	0.41	0
SARS-CoV2 M	Q8NHH1	TTLL11	0.02238	0.69	0.33	1|0|0	0|0|0|0|0|0|0|0|0|0|0	3.33	0
SARS-CoV2 M	Q8NI27	THOC2	0.202935	0.69	0.67	1|0|1	1|1|1|4|2|0|0|3|1|1|1	0.49	0
SARS-CoV2 M	Q8NI60	COQ8A	0.512649	0	12.67	14|10|14	0|0|0|0|0|0|0|0|0|0|0	126.67	1
SARS-CoV2 M	Q8TA86	RP9	0.321243	0.68	14	11|15|16	14|13|16|15|14|11|13|11|19|8|12	1.05	0
SARS-CoV2 M	Q8TAV0	FAM76A	0.0120816	0.51	0.67	0|2|0	3|1|0|0|2|2|0|2|1|1|1	0.56	0.04
SARS-CoV2 M	Q8TB61	SLC35B2	0.162136	0.69	0.33	0|1|0	0|0|0|0|0|0|0|0|0|0|0	3.33	0
SARS-CoV2 M	Q8TBF5	PIGX	0.427323	0.19	1.33	0|1|3	0|0|0|0|0|0|0|0|0|0|0	13.33	0.33
SARS-CoV2 M	Q8TBP6	SLC25A40	0.0608679	0.69	0.33	0|0|1	0|0|1|0|0|0|0|0|0|0|0	3.33	0
SARS-CoV2 M	Q8TBR7	TLCD3A	0.545524	0.23	1	2|0|1	0|0|0|0|0|0|0|0|0|0|0	10	0.32
SARS-CoV2 M	Q8TCG1	CIP2A	0.10109	0.69	0.33	0|1|0	0|0|0|0|0|0|0|0|0|0|0	3.33	0
SARS-CoV2 M	Q8TCJ2	STT3B	0.0177904	0.69	0.33	0|1|0	0|0|0|0|0|0|0|0|0|0|0	3.33	0
SARS-CoV2 M	Q8TCT9	HM13	0.423839	0.01	2	2|2|2	0|0|0|0|0|0|0|0|0|0|0	20	0.96
SARS-CoV2 M	Q8TDB4	MGARP	0.489448	0.69	1	1|1|1	0|0|0|0|0|0|0|0|0|0|0	10	0
SARS-CoV2 M	Q8TDX7	NEK7	0.36467	0.69	0.33	1|0|0	0|0|0|0|0|0|0|0|0|0|1	3.33	0
SARS-CoV2 M	Q8TEQ8	PIGO	0.0334022	0.69	0.33	1|0|0	0|0|0|0|0|0|0|0|0|0|0	3.33	0
SARS-CoV2 M	Q8TET4	GANC	0.341551	0.36	2	2|2|2	1|2|1|1|0|1|0|1|1|1|1	2.2	0.24
SARS-CoV2 M	Q8TEX9	IPO4	0.0630361	0	12	10|12|14	0|0|0|0|0|0|0|0|0|0|0	120	1
SARS-CoV2 M	Q8WU90	ZC3H15	0.00628599	0.69	0.33	1|0|0	1|1|2|5|1|1|0|0|0|0|1	0.31	0
SARS-CoV2 M	Q8WUA2	PPIL4	0.32048	0.69	4.33	4|4|5	8|10|8|11|8|7|2|3|8|4|7	0.63	0
SARS-CoV2 M	Q8WUD6	CHPT1	0.635974	0.05	2	2|1|3	0|0|0|0|0|0|0|0|0|0|0	20	0.65
SARS-CoV2 M	Q8WUM0	NUP133	0.865883	0.23	1	2|0|1	0|0|0|0|0|0|0|0|0|0|0	10	0.32
SARS-CoV2 M	Q8WUY1	THEM6	0.394731	0.18	2	4|1|1	0|0|0|0|0|0|0|0|0|0|0	20	0.33
SARS-CoV2 M	Q8WVD3	RNF138	0.218633	0.69	0.67	1|0|1	0|1|0|3|0|0|0|0|1|0|1	1.22	0
SARS-CoV2 M	Q8WVK2	SNRNP27	0.321246	0.69	5.33	5|5|6	8|4|9|9|8|6|4|6|6|8|7	0.78	0
SARS-CoV2 M	Q8WVM8	SCFD1	0.385748	0.08	1.67	2|1|2	0|0|0|0|0|0|0|0|0|0|0	16.67	0.64
SARS-CoV2 M	Q8WVP7	LMBR1	0.487659	0.08	1.67	2|2|1	0|0|0|0|0|0|0|0|0|0|0	16.67	0.64
SARS-CoV2 M	Q8WVV9	HNRNPLL	0.0177563	0.69	0.33	0|1|0	0|0|1|2|0|0|0|0|2|0|0	0.73	0
SARS-CoV2 M	Q8WVX9	FAR1	0.438891	0	14.67	12|16|16	0|0|0|0|0|0|0|0|0|0|0	146.67	1
SARS-CoV2 M	Q8WWC4	MAIP1	0.446051	0	2.67	3|2|3	0|0|0|0|0|0|0|0|0|0|0	26.67	0.98
SARS-CoV2 M	Q8WWK9	CKAP2	0.217706	0.69	0.67	0|1|1	1|0|0|1|1|0|0|1|1|0|0	1.47	0
SARS-CoV2 M	Q8WWM7	ATXN2L	0.195092	0.4	1	1|0|2	0|1|0|1|0|2|0|0|2|0|0	1.83	0.17
SARS-CoV2 M	Q8WXX5	DNAJC9	0.20423	0.69	0.67	1|1|0	2|4|3|2|0|0|0|3|1|1|0	0.46	0
SARS-CoV2 M	Q8WY22	BRI3BP	0.574147	0	4.67	6|3|5	0|0|0|0|0|0|0|0|0|0|0	46.67	1
SARS-CoV2 M	Q92499	DDX1	0.00452116	0.69	0.33	0|1|0	1|1|0|2|2|1|0|0|1|3|0	0.33	0
SARS-CoV2 M	Q92504	SLC39A7	0.543375	0	2.33	2|3|2	0|0|0|0|0|0|0|0|0|0|0	23.33	0.97
SARS-CoV2 M	Q92522	H1-10	0.323295	0.61	2.33	3|2|2	3|4|3|2|4|1|1|2|5|3|2	0.86	0
SARS-CoV2 M	Q92526	CCT6B	0.255738	0.69	0.67	0|1|1	1|0|0|0|0|0|0|0|0|0|0	6.67	0
SARS-CoV2 M	Q92536	SLC7A6	0.446578	0.23	1	1|0|2	0|0|0|0|0|0|0|0|0|0|0	10	0.32
SARS-CoV2 M	Q92576	PHF3	0.218344	0.69	0.67	1|0|1	2|1|1|1|2|1|0|0|1|0|0	0.81	0
SARS-CoV2 M	Q92604	LPGAT1	0.652521	0.04	2.33	3|3|1	0|0|0|0|0|0|0|0|0|0|0	23.33	0.66
SARS-CoV2 M	Q92621	NUP205	0.0628597	0	20.67	27|14|21	0|0|0|0|0|0|0|0|0|0|0	206.67	1
SARS-CoV2 M	Q92643	PIGK	0.224723	0.69	0.67	1|1|0	0|0|0|0|0|0|0|0|0|0|0	6.67	0
SARS-CoV2 M	Q92685	ALG3	0.279978	0.69	0.67	1|1|0	0|0|0|0|0|0|0|0|0|0|0	6.67	0
SARS-CoV2 M	Q92841	DDX17	0.331481	0.67	12	12|12|12	10|6|15|15|11|6|5|10|9|10|8	1.26	0
SARS-CoV2 M	Q92945	KHSRP	0.319292	0.68	7.67	6|7|10	15|8|11|6|9|11|5|7|10|12|10	0.81	0
SARS-CoV2 M	Q92947	GCDH	0.542076	0	5.67	6|5|6	0|0|0|0|0|0|0|0|0|0|0	56.67	1
SARS-CoV2 M	Q92973	TNPO1	0.492703	0	7	10|7|4	0|0|0|0|0|0|0|0|0|0|0	70	1
SARS-CoV2 M	Q92990	GLMN	0.865884	0.23	1	2|0|1	0|0|0|0|0|0|0|0|0|0|0	10	0.32
SARS-CoV2 M	Q969M3	YIPF5	0.404155	0	2.33	2|2|3	0|0|0|0|0|0|0|0|0|0|0	23.33	0.97
SARS-CoV2 M	Q969N2	PIGT	0.256138	0.08	1.33	2|2|0	0|0|0|0|0|0|0|0|0|0|0	13.33	0.64
SARS-CoV2 M	Q969Q0	RPL36AL	0.00511007	0.69	0.33	1|0|0	2|2|0|1|2|2|1|0|1|0|0	0.33	0
SARS-CoV2 M	Q969V3	NCLN	0.464252	0.23	1.33	2|1|1	0|0|0|0|0|0|0|0|0|0|0	13.33	0.32
SARS-CoV2 M	Q969X5	ERGIC1	0.31271	0.23	1.33	1|2|1	0|0|0|0|0|0|0|0|0|0|0	13.33	0.32
SARS-CoV2 M	Q969Z0	TBRG4	0.306162	0.23	1	2|1|0	0|0|0|0|0|0|0|0|0|0|0	10	0.32
SARS-CoV2 M	Q96A26	FAM162A	0.00897417	0.69	0.33	1|0|0	0|0|0|0|0|0|0|0|0|0|0	3.33	0
SARS-CoV2 M	Q96A33	CCDC47	0.506761	0	6.67	7|6|7	0|0|0|0|0|0|0|0|0|0|0	66.67	1
SARS-CoV2 M	Q96AA3	RFT1	0.551265	0	2.67	3|3|2	0|0|0|0|0|0|0|0|0|0|0	26.67	0.98
SARS-CoV2 M	Q96AB3	ISOC2	0.0932729	0.69	0.33	0|0|1	1|0|0|0|0|0|0|0|0|0|0	3.33	0
SARS-CoV2 M	Q96AE4	FUBP1	0.335127	0.69	1	1|1|1	0|1|1|0|0|1|1|1|1|1|1	1.38	0
SARS-CoV2 M	Q96AG4	LRRC59	0.327094	0.59	5.33	5|6|5	5|5|3|5|6|5|1|3|3|3|2	1.43	0
SARS-CoV2 M	Q96BI3	APH1A	0.264428	0.69	0.33	0|1|0	0|0|0|0|0|0|0|0|0|0|0	3.33	0
SARS-CoV2 M	Q96BK5	PINX1	0.318325	0.51	1.33	1|1|2	1|0|2|2|2|1|1|1|1|1|1	1.13	0.04
SARS-CoV2 M	Q96BQ5	CCDC127	0.425411	0.23	1.33	1|1|2	0|0|0|0|0|0|0|0|0|0|0	13.33	0.32
SARS-CoV2 M	Q96C36	PYCR2	0.484281	0	3.67	3|4|4	0|0|0|0|0|0|0|0|0|0|0	36.67	1
SARS-CoV2 M	Q96CP2	FLYWCH2	0.222719	0.69	0.67	1|1|0	1|0|1|1|1|1|0|1|1|1|0	0.92	0
SARS-CoV2 M	Q96CS3	FAF2	0.375662	0	9	12|6|9	0|0|0|0|0|0|0|0|0|0|0	90	1
SARS-CoV2 M	Q96CT7	CCDC124	0.319994	0.69	9.67	8|9|12	12|16|12|18|17|11|6|9|15|9|10	0.79	0
SARS-CoV2 M	Q96CW5	TUBGCP3	0.753607	0	7.67	9|8|6	0|0|0|0|0|0|0|0|0|0|0	76.67	1
SARS-CoV2 M	Q96D05	FAM241B	0.466368	0.69	1	1|1|1	0|0|0|0|0|0|0|0|0|0|0	10	0
SARS-CoV2 M	Q96D53	COQ8B	0.80074	0	3.33	2|3|5	0|0|0|0|0|0|0|0|0|0|0	33.33	0.99
SARS-CoV2 M	Q96DZ1	ERLEC1	0.3573	0.69	1	1|1|1	0|0|0|0|0|0|0|0|0|0|0	10	0
SARS-CoV2 M	Q96EC8	YIPF6	0.677288	0.08	1.33	2|2|0	0|0|0|0|0|0|0|0|0|0|0	13.33	0.64
SARS-CoV2 M	Q96EI5	TCEAL4	0.0129213	0.69	0.33	0|0|1	0|0|1|1|0|0|0|0|0|0|0	1.83	0
SARS-CoV2 M	Q96ER3	SAAL1	0.769473	0	3.33	3|4|3	0|0|0|0|0|0|0|0|0|0|0	33.33	1
SARS-CoV2 M	Q96EV2	RBM33	0.215646	0.43	1	0|2|1	1|1|0|0|1|1|1|0|1|1|1	1.38	0.12
SARS-CoV2 M	Q96EY1	DNAJA3	0.378597	0	7.33	10|8|4	0|0|0|1|0|0|0|1|0|0|0	40.33	1
SARS-CoV2 M	Q96EY4	TMA16	0.317639	0.68	8	9|5|10	11|8|11|10|9|7|10|9|12|8|10	0.84	0
SARS-CoV2 M	Q96F45	ZNF503	0.00318967	0.69	0.33	0|1|0	0|0|0|0|1|0|1|0|1|0|1	0.92	0
SARS-CoV2 M	Q96F86	EDC3	0.0899178	0.69	0.33	0|0|1	0|0|0|0|0|0|0|0|0|0|0	3.33	0
SARS-CoV2 M	Q96G23	CERS2	0.414874	0.05	2	3|1|2	0|0|0|0|0|0|0|0|0|0|0	20	0.65
SARS-CoV2 M	Q96GC9	VMP1	0.558826	0.69	0.67	1|0|1	0|0|0|0|0|0|0|0|0|0|0	6.67	0
SARS-CoV2 M	Q96GE9	DMAC1	0.378262	0.69	0.33	0|1|0	0|0|0|0|0|0|0|0|0|0|0	3.33	0
SARS-CoV2 M	Q96GQ5	RUSF1	0.247409	0.69	0.33	1|0|0	0|0|0|0|0|0|0|0|0|0|0	3.33	0
SARS-CoV2 M	Q96H79	ZC3HAV1L	0.311151	0.65	6	6|8|4	6|4|10|8|6|5|3|6|10|3|4	1.02	0
SARS-CoV2 M	Q96HR9	REEP6	0.955657	0.05	2.33	2|1|4	0|0|0|0|0|0|0|0|0|0|0	23.33	0.65
SARS-CoV2 M	Q96HS1	PGAM5	0.346486	0	3.33	4|4|2	0|0|0|0|0|0|0|0|0|0|0	33.33	0.99
SARS-CoV2 M	Q96HW7	INTS4	0.943305	0.05	2.67	5|2|1	0|0|0|0|0|0|0|0|0|0|0	26.67	0.65
SARS-CoV2 M	Q96I24	FUBP3	0.331877	0.68	31.67	32|33|30	23|25|26|20|18|24|17|15|21|24|18	1.51	0
SARS-CoV2 M	Q96I25	RBM17	0.301416	0.69	2.67	2|2|4	8|13|6|5|4|8|10|4|13|6|8	0.35	0
SARS-CoV2 M	Q96I59	NARS2	0.0473872	0.69	0.33	0|0|1	0|0|0|0|0|0|0|0|0|0|0	3.33	0
SARS-CoV2 M	Q96IU4	ABHD14B	0.310273	0.69	0.33	0|0|1	0|0|0|0|0|0|0|0|0|0|0	3.33	0
SARS-CoV2 M	Q96IX5	ATP5MD	0.345374	0	2.33	3|2|2	0|0|0|0|0|0|0|0|0|0|0	23.33	0.97
SARS-CoV2 M	Q96IZ7	RSRC1	0.204425	0.69	0.67	1|1|0	2|2|3|0|1|3|2|1|4|1|2	0.35	0
SARS-CoV2 M	Q96J01	THOC3	0.188389	0.69	1	2|0|1	2|4|1|0|2|1|3|0|4|3|3	0.48	0
SARS-CoV2 M	Q96JJ7	TMX3	0.18557	0.69	0.33	1|0|0	0|0|0|0|0|0|0|0|0|0|0	3.33	0
SARS-CoV2 M	Q96K19	RNF170	0.562247	0.69	0.67	1|0|1	0|0|0|0|0|0|0|0|0|0|0	6.67	0
SARS-CoV2 M	Q96K37	SLC35E1	0.0481535	0.18	2.67	6|1|1	0|0|0|0|0|0|0|0|0|0|0	26.67	0.33
SARS-CoV2 M	Q96KC2	ARL5B	0.88001	0.69	0.67	0|1|1	0|0|0|0|0|0|0|0|0|0|0	6.67	0
SARS-CoV2 M	Q96MH6	TMEM68	0.68551	0.69	0.33	1|0|0	0|0|0|0|0|0|0|0|0|0|0	3.33	0
SARS-CoV2 M	Q96MN5	TCEANC2	0.324407	0.69	1	1|1|1	2|1|2|2|1|1|0|1|3|1|1	0.73	0
SARS-CoV2 M	Q96MV1	TLCD4	0.719138	0.23	1	2|1|0	0|0|0|0|0|0|0|0|0|0|0	10	0.32
SARS-CoV2 M	Q96N66	MBOAT7	0.0843083	0.69	0.33	1|0|0	0|0|0|0|0|0|0|0|0|0|0	3.33	0
SARS-CoV2 M	Q96NB2	SFXN2	0.0225508	0.69	0.33	1|0|0	0|0|0|0|0|0|0|0|0|0|0	3.33	0
SARS-CoV2 M	Q96NT5	SLC46A1	0.880009	0.69	0.67	0|1|1	0|0|0|0|0|0|0|0|0|0|0	6.67	0
SARS-CoV2 M	Q96P11	NSUN5	0.278655	0.69	0.67	0|1|1	1|0|1|0|0|0|0|0|0|0|0	3.67	0
SARS-CoV2 M	Q96P70	IPO9	0.489099	0	8	10|7|7	0|0|0|0|0|0|0|0|0|0|0	80	1
SARS-CoV2 M	Q96PK6	RBM14	0.00285264	0.51	0.67	0|2|0	0|6|5|3|0|0|0|0|0|1|0	0.49	0.04
SARS-CoV2 M	Q96QD8	SLC38A2	0.185179	0.69	0.33	1|0|0	0|0|0|0|0|0|0|0|0|0|0	3.33	0
SARS-CoV2 M	Q96QU8	XPO6	0.367962	0.69	0.67	1|0|1	0|0|0|0|0|0|0|0|0|0|0	6.67	0
SARS-CoV2 M	Q96RQ3	MCCC1	0.328617	0.69	16.67	15|17|18	34|23|11|8|3|14|15|1|28|20|22	1.02	0
SARS-CoV2 M	Q96SK2	TMEM209	0.362878	0.19	1.67	1|3|1	0|0|0|0|0|0|0|0|0|0|0	16.67	0.33
SARS-CoV2 M	Q96T17	MAP7D2	0.336141	0.69	1	1|1|1	2|1|0|1|0|1|0|1|2|1|0	1.22	0
SARS-CoV2 M	Q96T37	RBM15	0.242471	0.69	0.67	1|1|0	0|0|1|1|0|0|0|0|0|0|0	3.67	0
SARS-CoV2 M	Q96T76	MMS19	0.556863	0	6.67	9|6|5	0|0|0|0|0|0|0|0|0|0|0	66.67	1
SARS-CoV2 M	Q99460	PSMD1	0.279274	0.23	1	2|1|0	0|0|0|0|0|0|0|0|0|0|0	10	0.32
SARS-CoV2 M	Q99497	PARK7	0.325933	0.69	23.33	24|21|25	35|20|25|24|17|18|21|17|29|15|18	1.07	0
SARS-CoV2 M	Q99570	PIK3R4	0.434656	0.69	0.67	0|1|1	0|0|0|0|0|0|0|0|0|0|0	6.67	0
SARS-CoV2 M	Q99615	DNAJC7	0.178175	0.32	1.33	3|1|0	0|0|0|1|0|0|1|0|1|0|1	3.67	0.3
SARS-CoV2 M	Q99623	PHB2	0.325992	0.64	7.33	6|7|9	7|8|6|9|5|3|4|8|4|6|6	1.22	0
SARS-CoV2 M	Q99653	CHP1	0.408158	0	8	8|7|9	0|0|0|0|0|0|0|0|0|0|0	80	1
SARS-CoV2 M	Q99661	KIF2C	0.0154724	0.69	0.33	0|0|1	1|0|0|2|0|0|0|0|0|0|0	1.22	0
SARS-CoV2 M	Q99714	HSD17B10	0.325085	0.49	1.33	2|1|1	4|1|2|1|1|0|0|0|1|2|0	1.22	0.05
SARS-CoV2 M	Q99720	SIGMAR1	0.0347513	0.69	0.33	0|1|0	0|0|0|0|0|0|0|0|0|0|0	3.33	0
SARS-CoV2 M	Q99805	TM9SF2	0.410099	0.19	1.67	3|1|1	0|0|0|0|0|0|0|0|0|0|0	16.67	0.33
SARS-CoV2 M	Q99808	SLC29A1	0.744657	0.69	1	1|1|1	0|0|0|0|0|0|0|0|0|0|0	10	0
SARS-CoV2 M	Q99832	CCT7	0.298549	0.12	2.33	4|2|1	0|1|1|1|0|0|0|0|1|0|0	6.42	0.55
SARS-CoV2 M	Q99942	RNF5	0.350855	0.18	2	1|1|4	0|0|0|0|0|0|0|0|0|0|0	20	0.33
SARS-CoV2 M	Q9BPW8	NIPSNAP1	0.291073	0.23	1	2|0|1	0|0|0|0|0|0|0|0|0|0|0	10	0.32
SARS-CoV2 M	Q9BPX3	NCAPG	0.367068	0.69	0.33	1|0|0	0|0|0|0|0|0|0|0|0|0|0	3.33	0
SARS-CoV2 M	Q9BQ61	TRIR	0.208995	0.69	0.67	1|1|0	0|0|2|1|0|0|1|0|1|1|0	1.22	0
SARS-CoV2 M	Q9BQ69	MACROD1	0.0118351	0.46	0.67	0|0|2	1|2|0|2|1|1|0|0|1|1|1	0.73	0.08
SARS-CoV2 M	Q9BQ70	TCF25	0.108373	0.69	0.33	0|0|1	0|0|0|0|0|0|0|0|0|0|0	3.33	0
SARS-CoV2 M	Q9BQB6	VKORC1	0.376889	0.08	1.67	2|2|1	0|0|0|0|0|0|0|0|0|0|0	16.67	0.64
SARS-CoV2 M	Q9BQE3	TUBA1C	0.359421	0	4.67	6|4|4	0|0|1|0|0|0|0|0|0|0|0	46.67	1
SARS-CoV2 M	Q9BQG0	MYBBP1A	0.359202	0	6	8|5|5	0|0|0|0|1|0|0|0|0|0|0	60	1
SARS-CoV2 M	Q9BQT8	SLC25A21	0.88078	0.05	2	2|3|1	0|0|0|0|0|0|0|0|0|0|0	20	0.65
SARS-CoV2 M	Q9BRJ7	NUDT16L1	0.32396	0.53	3.67	5|3|3	1|3|4|2|4|2|2|2|2|2|4	1.44	0.02
SARS-CoV2 M	Q9BRK5	SDF4	0.533857	0	7.33	7|8|7	0|0|0|0|0|0|0|0|0|0|0	73.33	1
SARS-CoV2 M	Q9BRP1	PDCD2L	0.208479	0.69	1.33	2|0|2	2|2|2|2|3|2|2|2|1|1|3	0.67	0
SARS-CoV2 M	Q9BRP8	PYM1	0.210602	0.69	0.67	0|1|1	0|1|1|6|1|1|0|0|0|1|1	0.61	0
SARS-CoV2 M	Q9BRR3	PGAP4	0.527182	0.08	1.67	2|1|2	0|0|0|0|0|0|0|0|0|0|0	16.67	0.64
SARS-CoV2 M	Q9BRR6	ADPGK	0.368178	0.69	0.67	0|1|1	0|0|0|0|0|0|0|0|0|0|0	6.67	0
SARS-CoV2 M	Q9BRX2	PELO	0.327023	0.63	7.33	9|5|8	7|4|8|11|5|5|3|5|6|5|5	1.26	0
SARS-CoV2 M	Q9BRY0	SLC39A3	0.68551	0.69	0.33	0|0|1	0|0|0|0|0|0|0|0|0|0|0	3.33	0
SARS-CoV2 M	Q9BSD7	NTPCR	0.329401	0.66	8	10|7|7	8|6|10|8|7|7|5|8|9|6|5	1.11	0
SARS-CoV2 M	Q9BSH5	HDHD3	0.0297587	0.69	0.33	1|0|0	1|0|0|1|1|0|0|0|1|0|0	0.92	0
SARS-CoV2 M	Q9BSJ2	TUBGCP2	0.839581	0	13	16|13|10	0|0|0|0|0|0|0|0|0|0|0	130	1
SARS-CoV2 M	Q9BT17	MTG1	0.0104701	0.69	0.33	1|0|0	1|0|1|1|2|0|0|0|1|1|0	0.52	0
SARS-CoV2 M	Q9BT22	ALG1	0.394912	0.08	1.67	2|2|1	0|0|0|0|0|0|0|0|0|0|0	16.67	0.64
SARS-CoV2 M	Q9BTE7	DCUN1D5	0.20841	0.46	1.67	0|2|3	2|2|2|2|2|1|1|0|2|0|1	1.22	0.09
SARS-CoV2 M	Q9BTV4	TMEM43	0.528233	0	12.67	17|10|11	0|0|0|0|0|0|0|0|0|0|0	126.67	1
SARS-CoV2 M	Q9BTY2	FUCA2	0.440518	0.23	1.33	2|1|1	0|0|0|0|0|0|0|0|0|0|0	13.33	0.32
SARS-CoV2 M	Q9BU76	C1orf35	0.316002	0.69	5.67	6|4|7	10|9|11|10|8|8|8|8|11|6|8	0.64	0
SARS-CoV2 M	Q9BUB7	TMEM70	0.488237	0.69	1	1|1|1	0|0|0|0|0|0|0|0|0|0|0	10	0
SARS-CoV2 M	Q9BUF5	TUBB6	0.416118	0	14.67	18|10|16	0|0|0|0|0|0|0|0|0|0|0	146.67	1
SARS-CoV2 M	Q9BUN8	DERL1	0.645421	0.05	1.67	3|2|0	0|0|0|0|0|0|0|0|0|0|0	16.67	0.65
SARS-CoV2 M	Q9BUV8	RAB5IF	0.497268	0.69	0.67	1|1|0	0|0|0|0|0|0|0|0|0|0|0	6.67	0
SARS-CoV2 M	Q9BV68	RNF126	0.480774	0	3.67	5|3|3	0|0|0|0|0|0|0|0|0|0|0	36.67	1
SARS-CoV2 M	Q9BVA1	TUBB2B	0.410834	0.11	1.67	2|1|2	0|0|0|0|0|0|0|0|0|2|0	9.17	0.59
SARS-CoV2 M	Q9BVC6	TMEM109	0.241538	0.69	0.67	1|1|0	0|0|0|0|0|0|0|0|0|0|0	6.67	0
SARS-CoV2 M	Q9BVG9	PTDSS2	0.539871	0.19	1.67	1|1|3	0|0|0|0|0|0|0|0|0|0|0	16.67	0.33
SARS-CoV2 M	Q9BVP2	GNL3	0.209051	0.69	0.67	1|1|0	0|1|0|0|0|0|0|0|0|0|0	6.67	0
SARS-CoV2 M	Q9BVV7	TIMM21	0.42532	0.03	2.67	4|1|3	0|0|0|0|0|0|0|0|0|0|0	26.67	0.66
SARS-CoV2 M	Q9BW19	KIFC1	0.327481	0.4	1.33	1|1|2	1|0|1|0|0|0|0|0|1|2|1	2.44	0.17
SARS-CoV2 M	Q9BW92	TARS2	0.758111	0	2.67	4|2|2	0|0|0|0|0|0|0|0|0|0|0	26.67	0.97
SARS-CoV2 M	Q9BX73	TM2D2	0.984334	0.08	1.67	2|1|2	0|0|0|0|0|0|0|0|0|0|0	16.67	0.64
SARS-CoV2 M	Q9BXJ8	TMEM120A	0.371067	0.69	0.67	0|1|1	0|0|0|0|0|0|0|0|0|0|0	6.67	0
SARS-CoV2 M	Q9BXW7	HDHD5	0.671715	0.05	2.67	5|2|1	0|0|0|0|0|0|0|0|0|0|0	26.67	0.65
SARS-CoV2 M	Q9BXW9	FANCD2	0.637303	0	11	12|10|11	0|0|0|0|0|0|0|0|0|0|0	110	1
SARS-CoV2 M	Q9BY42	RTF2	0.327156	0.6	2.33	3|2|2	2|3|4|3|3|1|2|1|3|3|2	0.95	0
SARS-CoV2 M	Q9BY77	POLDIP3	0.324722	0.69	1	1|1|1	2|2|1|3|1|0|0|0|1|1|1	0.92	0
SARS-CoV2 M	Q9BYB4	GNB1L	0.325897	0.69	5.67	5|6|6	8|7|5|11|10|10|4|5|7|1|3	0.88	0
SARS-CoV2 M	Q9BYC8	MRPL32	0.32836	0.69	1	1|1|1	1|1|0|2|0|1|2|0|1|0|1	1.22	0
SARS-CoV2 M	Q9BZE1	MRPL37	0.532284	0.23	1	2|1|0	0|0|0|0|0|0|0|0|0|0|0	10	0.32
SARS-CoV2 M	Q9BZI7	UPF3B	0.00736841	0.69	0.33	0|0|1	0|2|0|2|4|0|0|1|1|1|1	0.31	0
SARS-CoV2 M	Q9BZQ6	EDEM3	0.470388	0.69	1	1|1|1	0|0|0|0|0|0|0|0|0|0|0	10	0
SARS-CoV2 M	Q9BZX2	UCK2	0.472056	0	4.33	4|5|4	0|0|0|0|0|0|0|0|0|0|0	43.33	1
SARS-CoV2 M	Q9C0D9	SELENOI	0.879777	0.69	0.67	1|1|0	0|0|0|0|0|0|0|0|0|0|0	6.67	0
SARS-CoV2 M	Q9C0E2	XPO4	0.879776	0.69	0.67	1|1|0	0|0|0|0|0|0|0|0|0|0|0	6.67	0
SARS-CoV2 M	Q9GZM5	YIPF3	0.483341	0.05	2	2|1|3	0|0|0|0|0|0|0|0|0|0|0	20	0.65
SARS-CoV2 M	Q9GZP4	PITHD1	0.179686	0.49	1.33	0|1|3	3|2|2|1|1|1|2|1|2|0|1	0.92	0.05
SARS-CoV2 M	Q9GZP9	DERL2	0.374662	0.69	0.67	1|1|0	0|0|0|0|0|0|0|0|0|0|0	6.67	0
SARS-CoV2 M	Q9GZT3	SLIRP	0.207973	0.69	0.33	1|0|0	0|0|0|0|0|0|0|0|0|0|0	3.33	0
SARS-CoV2 M	Q9H078	CLPB	0.464001	0	8.33	6|7|12	0|0|0|0|0|0|0|0|0|0|0	83.33	1
SARS-CoV2 M	Q9H0C8	ILKAP	0.00988558	0.69	0.33	0|0|1	2|2|1|0|0|0|0|0|1|1|0	0.52	0
SARS-CoV2 M	Q9H0D6	XRN2	0.0080493	0.69	0.33	0|1|0	0|1|0|0|0|0|0|1|0|0|1	1.22	0
SARS-CoV2 M	Q9H0G5	NSRP1	0.0432054	0.69	0.33	0|0|1	1|0|0|0|0|0|0|0|0|0|0	3.33	0
SARS-CoV2 M	Q9H0S4	DDX47	0.315816	0.52	2.67	4|2|2	2|3|2|2|4|1|0|3|2|1|3	1.28	0.03
SARS-CoV2 M	Q9H158	PCDHAC1	0.0253784	0.69	0.33	0|0|1	0|0|0|0|0|0|0|0|0|0|0	3.33	0
SARS-CoV2 M	Q9H1E3	NUCKS1	0.024027	0.43	0.67	0|2|0	1|1|0|3|1|0|0|0|1|1|0	0.92	0.12
SARS-CoV2 M	Q9H2C2	ARV1	0.065836	0.69	0.33	0|1|0	0|0|0|0|0|0|0|0|0|0|0	3.33	0
SARS-CoV2 M	Q9H2H9	SLC38A1	0.0679206	0.69	0.33	0|1|0	0|0|0|0|0|0|0|0|0|0|0	3.33	0
SARS-CoV2 M	Q9H2J7	SLC6A15	0.246797	0.69	0.67	1|0|1	0|0|0|0|0|0|0|0|0|0|0	6.67	0
SARS-CoV2 M	Q9H2K0	MTIF3	0.210462	0.69	0.67	0|1|1	1|0|0|0|2|1|0|0|2|1|1	0.92	0
SARS-CoV2 M	Q9H2V7	SPNS1	0.478408	0	3.33	5|2|3	0|0|0|0|0|0|0|0|0|0|0	33.33	0.99
SARS-CoV2 M	Q9H300	PARL	0.386419	0.69	0.67	1|1|0	0|0|0|0|0|0|0|0|0|0|0	6.67	0
SARS-CoV2 M	Q9H330	TMEM245	0.772771	0.05	1.67	2|3|0	0|0|0|0|0|0|0|0|0|0|0	16.67	0.65
SARS-CoV2 M	Q9H3G5	CPVL	0.0665129	0.69	0.33	0|1|0	0|0|0|0|0|0|0|0|0|0|0	3.33	0
SARS-CoV2 M	Q9H3J6	C12orf65	0.337997	0.69	1	1|1|1	1|1|1|1|0|1|0|1|1|0|2	1.22	0
SARS-CoV2 M	Q9H3K2	GHITM	0.0307869	0.69	0.33	1|0|0	0|0|0|0|0|0|0|0|0|0|0	3.33	0
SARS-CoV2 M	Q9H3K6	BOLA2	0.308757	0.69	3.33	4|4|2	5|5|7|6|5|4|4|5|5|3|4	0.69	0
SARS-CoV2 M	Q9H3N1	TMX1	0.296869	0.08	1.33	2|0|2	0|0|0|0|0|0|0|0|0|0|0	13.33	0.64
SARS-CoV2 M	Q9H3U1	UNC45A	0.0161317	0.08	1.67	2|2|1	0|0|0|0|0|0|0|0|0|0|0	16.67	0.64
SARS-CoV2 M	Q9H3U5	MFSD1	0.879776	0.69	0.67	1|1|0	0|0|0|0|0|0|0|0|0|0|0	6.67	0
SARS-CoV2 M	Q9H490	PIGU	0.53858	0.04	2.33	3|3|1	0|0|0|0|0|0|0|0|0|0|0	23.33	0.66
SARS-CoV2 M	Q9H5Q4	TFB2M	0.399188	0.19	1.67	1|1|3	0|0|0|0|0|0|0|0|0|0|0	16.67	0.33
SARS-CoV2 M	Q9H5V9	CXorf56	0.0185767	0.69	0.33	0|1|0	0|0|1|0|0|1|0|1|1|2|1	0.52	0
SARS-CoV2 M	Q9H649	NSUN3	0.0495691	0.69	0.33	1|0|0	0|0|1|0|0|0|0|0|0|0|0	3.33	0
SARS-CoV2 M	Q9H773	DCTPP1	0.292992	0.22	1.67	3|1|1	0|0|0|0|1|0|0|0|1|0|0	9.17	0.33
SARS-CoV2 M	Q9H7C9	AAMDC	0.192477	0.69	1	2|0|1	3|2|2|1|2|3|3|1|3|3|2	0.44	0
SARS-CoV2 M	Q9H7F0	ATP13A3	0.487612	0	2.33	2|3|2	0|0|0|0|0|0|0|0|0|0|0	23.33	0.97
SARS-CoV2 M	Q9H857	NT5DC2	0.314414	0.47	3.67	3|2|6	6|0|7|2|4|1|0|2|0|2|3	1.49	0.08
SARS-CoV2 M	Q9H910	JPT2	0.00620013	0.69	0.33	1|0|0	4|1|2|2|2|0|0|0|2|2|1	0.23	0
SARS-CoV2 M	Q9H936	SLC25A22	0.37379	0	8.67	6|7|13	0|0|0|0|0|0|0|0|0|0|0	86.67	1
SARS-CoV2 M	Q9H974	QTRT2	0.280722	0.23	1	1|2|0	0|0|0|0|0|0|0|0|0|0|0	10	0.32
SARS-CoV2 M	Q9H9A6	LRRC40	0.00706299	0.69	0.33	0|0|1	3|1|3|1|1|0|0|1|3|2|1	0.23	0
SARS-CoV2 M	Q9H9B4	SFXN1	0.357172	0.23	1	1|2|0	0|0|0|0|0|0|0|0|0|0|0	10	0.32
SARS-CoV2 M	Q9H9S3	SEC61A2	0.583721	0.05	2	1|3|2	0|0|0|0|0|0|0|0|0|0|0	20	0.65
SARS-CoV2 M	Q9HA64	FN3KRP	0.30717	0.69	1.67	1|2|2	5|4|5|4|5|3|3|3|4|2|3	0.45	0
SARS-CoV2 M	Q9HAV4	XPO5	0.337819	0	7.67	10|6|7	0|0|0|0|0|0|0|0|0|0|0	76.67	1
SARS-CoV2 M	Q9HB71	CACYBP	0.310419	0.69	1	1|1|1	4|8|4|13|5|4|4|4|5|4|5	0.18	0
SARS-CoV2 M	Q9HBI0	PARVG	0.333625	0.69	1	1|1|1	0|0|1|1|1|1|1|1|1|0|1	1.38	0
SARS-CoV2 M	Q9HC07	TMEM165	0.455485	0	5	5|4|6	0|0|0|0|0|0|0|0|0|0|0	50	1
SARS-CoV2 M	Q9HC21	SLC25A19	0.433947	0.69	1	1|1|1	0|0|0|0|0|0|0|0|0|0|0	10	0
SARS-CoV2 M	Q9HC38	GLOD4	0.176713	0.59	1.33	0|1|3	2|4|2|1|1|2|2|2|4|3|3	0.56	0
SARS-CoV2 M	Q9HC62	SENP2	0.0148941	0.69	0.33	1|0|0	0|0|0|0|0|0|0|0|2|0|0	1.83	0
SARS-CoV2 M	Q9HCC0	MCCC2	0.330213	0.68	16.33	18|13|18	32|21|9|4|3|14|11|4|24|18|17	1.14	0
SARS-CoV2 M	Q9HCG8	CWC22	0.00384776	0.69	0.33	1|0|0	3|3|3|3|0|2|2|0|3|0|2	0.17	0
SARS-CoV2 M	Q9HCN8	SDF2L1	0.315481	0.23	1.33	1|1|2	0|0|0|0|0|0|0|0|0|0|0	13.33	0.32
SARS-CoV2 M	Q9HCU5	PREB	0.385298	0	2.33	2|2|3	0|0|0|0|0|0|0|0|0|0|0	23.33	0.97
SARS-CoV2 M	Q9HD42	CHMP1A	0.203428	0.69	0.67	1|0|1	2|1|3|2|2|2|1|1|2|3|3	0.33	0
SARS-CoV2 M	Q9HDC9	APMAP	0.0361283	0.69	0.33	0|1|0	0|0|0|0|0|0|0|0|0|0|0	3.33	0
SARS-CoV2 M	Q9NP64	ZCCHC17	0.3244	0.68	9.67	12|8|9	9|15|10|13|9|9|11|12|17|4|7	0.92	0
SARS-CoV2 M	Q9NP72	RAB18	0.386513	0.19	1.33	3|1|0	0|0|0|0|0|0|0|0|0|0|0	13.33	0.33
SARS-CoV2 M	Q9NPA8	ENY2	0.368694	0.12	2.33	2|2|3	1|0|1|1|0|1|0|0|2|0|1	3.67	0.53
SARS-CoV2 M	Q9NPL8	TIMMDC1	0.370214	0.23	1	1|2|0	0|0|0|0|0|0|0|0|0|0|0	10	0.32
SARS-CoV2 M	Q9NQ29	LUC7L	0.320391	0.69	3.67	3|4|4	5|4|5|4|6|5|4|5|4|5|3	0.81	0
SARS-CoV2 M	Q9NQC3	RTN4	0.873826	0	10.67	11|11|10	0|0|0|0|0|0|0|0|0|0|0	106.67	1
SARS-CoV2 M	Q9NR50	EIF2B3	0.071787	0.69	0.33	0|0|1	0|0|0|0|0|0|0|0|0|0|0	3.33	0
SARS-CoV2 M	Q9NRC1	ST7	0.68551	0.69	0.33	1|0|0	0|0|0|0|0|0|0|0|0|0|0	3.33	0
SARS-CoV2 M	Q9NRP0	OSTC	0.375245	0.23	1.33	1|1|2	0|0|0|0|0|0|0|0|0|0|0	13.33	0.32
SARS-CoV2 M	Q9NRW3	APOBEC3C	0.33571	0.69	1	1|1|1	2|1|2|3|1|1|1|1|2|0|0	0.79	0
SARS-CoV2 M	Q9NRX1	PNO1	0.320612	0.48	1.33	1|1|2	1|1|1|3|1|0|0|0|1|2|1	1.33	0.06
SARS-CoV2 M	Q9NRX5	SERINC1	0.651685	0	3	4|2|3	0|0|0|0|0|0|0|0|0|0|0	30	0.98
SARS-CoV2 M	Q9NRZ5	AGPAT4	0.424924	0.05	2	2|1|3	0|0|0|0|0|0|0|0|0|0|0	20	0.65
SARS-CoV2 M	Q9NS69	TOMM22	0.387809	0	3.33	6|2|2	0|0|0|0|0|0|0|0|0|0|0	33.33	0.97
SARS-CoV2 M	Q9NS86	LANCL2	0.187443	0.69	1	1|0|2	1|2|3|3|3|3|2|3|2|0|2	0.46	0
SARS-CoV2 M	Q9NSD9	FARSB	0.349698	0.46	2	2|2|2	4|1|0|0|1|0|0|0|2|5|2	1.47	0.08
SARS-CoV2 M	Q9NSI2	FAM207A	0.028232	0.69	0.33	0|0|1	0|0|0|0|0|0|0|0|0|0|0	3.33	0
SARS-CoV2 M	Q9NSV4	DIAPH3	0.199417	0.69	0.67	0|1|1	5|3|4|1|3|3|2|1|3|3|4	0.23	0
SARS-CoV2 M	Q9NTJ3	SMC4	0.323695	0.39	1.33	2|1|1	1|0|1|0|1|0|1|0|0|0|1	2.93	0.19
SARS-CoV2 M	Q9NTX5	ECHDC1	0.980772	0.23	1.33	2|1|1	0|0|0|0|0|0|0|0|0|0|0	13.33	0.32
SARS-CoV2 M	Q9NUI1	DECR2	0.337374	0.14	2	1|2|3	2|0|0|2|0|0|0|0|1|1|0	3.67	0.43
SARS-CoV2 M	Q9NUM3	SLC39A9	0.681364	0.69	1	1|1|1	0|0|0|0|0|0|0|0|0|0|0	10	0
SARS-CoV2 M	Q9NUQ2	AGPAT5	0.666942	0	2.33	2|3|2	0|0|0|0|0|0|0|0|0|0|0	23.33	0.97
SARS-CoV2 M	Q9NVA4	TMEM184C	0.564484	0.69	0.67	1|1|0	0|0|0|0|0|0|0|0|0|0|0	6.67	0
SARS-CoV2 M	Q9NVH1	DNAJC11	0.348153	0.08	1.67	1|2|2	0|0|0|0|0|0|0|0|0|0|0	16.67	0.64
SARS-CoV2 M	Q9NVH2	INTS7	0.808245	0.08	1.67	1|2|2	0|0|0|0|0|0|0|0|0|0|0	16.67	0.64
SARS-CoV2 M	Q9NVI1	FANCI	0.557294	0	27	27|25|29	0|0|0|0|0|0|0|0|0|0|0	270	1
SARS-CoV2 M	Q9NVI7	ATAD3A	0.338746	0	5.67	4|8|5	0|0|0|0|0|0|0|0|0|0|0	56.67	1
SARS-CoV2 M	Q9NVN8	GNL3L	0.20535	0.69	0.67	1|1|0	0|1|1|4|4|0|1|0|0|0|1	0.61	0
SARS-CoV2 M	Q9NVV5	AIG1	0.680181	0.69	0.67	1|1|0	0|0|0|0|0|0|0|0|0|0|0	6.67	0
SARS-CoV2 M	Q9NW81	DMAC2	0.543792	0.69	1	1|1|1	0|0|0|0|0|0|0|0|0|0|0	10	0
SARS-CoV2 M	Q9NWB6	ARGLU1	0.309415	0.6	4.67	3|4|7	7|3|3|4|3|5|5|3|6|2|5	1.12	0
SARS-CoV2 M	Q9NWS8	RMND1	0.447103	0.23	1	2|1|0	0|0|0|0|0|0|0|0|0|0|0	10	0.32
SARS-CoV2 M	Q9NWT1	PAK1IP1	0.00748006	0.69	0.33	0|0|1	0|2|3|2|2|1|0|1|0|1|0	0.31	0
SARS-CoV2 M	Q9NWW5	CLN6	0.421774	0	5.33	7|4|5	0|0|0|0|0|0|0|0|0|0|0	53.33	1
SARS-CoV2 M	Q9NX07	TRNAU1AP	0.880121	0.69	0.67	1|0|1	0|0|0|0|0|0|0|0|0|0|0	6.67	0
SARS-CoV2 M	Q9NX20	MRPL16	0.35267	0.23	1	2|1|0	0|0|0|0|0|0|0|0|0|0|0	10	0.32
SARS-CoV2 M	Q9NX24	NHP2	0.0102044	0.69	0.33	0|1|0	0|1|2|2|1|3|0|1|0|1|0	0.33	0
SARS-CoV2 M	Q9NX58	LYAR	0.302244	0.69	1.67	1|2|2	4|6|2|3|4|2|1|4|5|2|5	0.48	0
SARS-CoV2 M	Q9NX61	TMEM161A	0.546884	0	4	4|5|3	0|0|0|0|0|0|0|0|0|0|0	40	1
SARS-CoV2 M	Q9NX63	CHCHD3	0.337222	0	3	2|3|4	0|0|0|0|0|0|0|0|0|0|0	30	0.98
SARS-CoV2 M	Q9NX76	CMTM6	0.7802	0.18	2	4|1|1	0|0|0|0|0|0|0|0|0|0|0	20	0.33
SARS-CoV2 M	Q9NXE4	SMPD4	0.540148	0	12.33	14|12|11	0|0|0|0|0|0|0|0|0|0|0	123.33	1
SARS-CoV2 M	Q9NXE8	CWC25	0.32159	0.61	3	4|2|3	5|3|7|3|3|3|3|2|2|2|2	0.94	0
SARS-CoV2 M	Q9NXS2	QPCTL	0.25412	0.05	1.67	3|2|0	0|0|0|0|0|0|0|0|0|0|0	16.67	0.65
SARS-CoV2 M	Q9NXW2	DNAJB12	0.467893	0	7.67	8|7|8	0|0|0|0|0|0|0|0|0|0|0	76.67	1
SARS-CoV2 M	Q9NY12	GAR1	0.341554	0.69	1	1|1|1	0|0|0|1|0|0|0|0|0|0|0	10	0
SARS-CoV2 M	Q9NY26	SLC39A1	0.519122	0.08	1.67	2|2|1	0|0|0|0|0|0|0|0|0|0|0	16.67	0.64
SARS-CoV2 M	Q9NY93	DDX56	0.309369	0.48	1.33	1|2|1	1|2|1|1|1|1|1|1|1|0|1	1.33	0.06
SARS-CoV2 M	Q9NYF8	BCLAF1	0.0041374	0.69	0.33	0|1|0	0|2|3|8|2|2|1|0|2|0|2	0.17	0
SARS-CoV2 M	Q9NYP9	MIS18A	0.168297	0.57	1.33	1|0|3	3|4|3|1|2|2|2|0|3|1|2	0.64	0.01
SARS-CoV2 M	Q9NYY8	FASTKD2	0.68551	0.69	0.33	1|0|0	0|0|0|0|0|0|0|0|0|0|0	3.33	0
SARS-CoV2 M	Q9NZ01	TECR	0.394616	0	12	15|8|13	0|0|0|0|0|0|0|0|0|0|0	120	1
SARS-CoV2 M	Q9NZ45	CISD1	0.0322945	0.69	0.33	0|1|0	0|0|0|0|0|0|0|0|0|0|0	3.33	0
SARS-CoV2 M	Q9NZW5	MPP6	0.0118987	0.69	0.33	0|0|1	1|0|3|0|0|0|0|1|1|2|2	0.37	0
SARS-CoV2 M	Q9P003	CNIH4	0.370229	0.04	2.33	3|3|1	0|0|0|0|0|0|0|0|0|0|0	23.33	0.66
SARS-CoV2 M	Q9P016	THYN1	0.326233	0.66	5.33	5|5|6	7|4|8|4|5|6|6|7|7|4|4	0.95	0
SARS-CoV2 M	Q9P021	CRIPT	0.301536	0.52	2	2|1|3	2|0|4|3|1|0|3|2|2|1|1	1.16	0.03
SARS-CoV2 M	Q9P031	CCDC59	0.0214381	0.44	0.67	2|0|0	0|0|1|2|2|1|0|1|1|0|1	0.81	0.1
SARS-CoV2 M	Q9P032	NDUFAF4	0.0339014	0.69	0.33	1|0|0	0|0|0|0|0|0|0|0|0|0|0	3.33	0
[truncated: 20,154 more rows]
